# Supplementary material for: Periodontal and peri-implant microbiome dysbiosis is associated with alterations in the microbial community structure and local stability
Source: Research Square preprint supplement (doi:10.21203/rs.3.rs-694037/v2), 2021-10-15
Supplement: Supplementary file 1 [file d4df03867281a602b4b73da5.xlsx]

## Sheet: Sheet1
#mpa_v30_CHOCOPhlAn_201901
clade_name	IIU_82.profile	IIU_42.profile	IIU_31.profile	IID_84.profile	IID_44.profile	IID_33.profile	IID_264.profile	IID_194.profile	H_O_up.profile	H_O_dw.profile	H_N_up.profile	H_N_dw.profile	H_K_up.profile	H_K_dw.profile	H_I_up.profile	HIU_B1.profile	HIU_A2.profile	HIU_256.profile	HIU_252.profile	HIU_242.profile	HIU_232.profile	HIU_222.profile	HIU_186.profile	HIU_182.profile	H_I_dw.profile	HID_B3.profile	HID_B2.profile	HID_258.profile	HID_254.profile	HID_244.profile	HID_234.profile	HID_224.profile	HID_188.profile	HID_184.profile	H_H_up.profile	H_H_dw.profile	H_G_up.profile	H_G_dw.profile	E3.profile	E2.profile	D2.profile	CP_t_up.profile	CP_t_dw.profile	CP_q_up.profile	CP_q_dw.profile	CP_o_up.profile	CP_o_dw.profile	CP_m_up.profile	CP_m_dw.profile
k__Bacteria	100	100	100	100	100	100	100	100	100	100	100	100	100	100	100	99.9287	99.8527	100	100	100	100	100	100	100	100	100	99.6356	100	100	100	100	100	100	100	100	100	100	100	100	100	100	99.9436	99.8586	100	100	100	100	99.9938	100
k__Bacteria|p__Actinobacteria	29.0797	21.9262	33.761	23.8221	18.1689	17.8209	0.57676	24.9896	57.1131	53.9706	38.9388	52.9806	22.8683	26.5555	47.0507	23.8722	12.1698	29.4417	14.1303	28.4269	17.4436	56.5866	48.5969	74.2744	43.146	47.4773	8.12558	4.86318	6.3452	7.39192	27.2526	30.6995	16.7564	39.4697	17.5502	23.59	46.2286	27.9028	20.854	16.5254	17.895	19.5766	3.27089	24.9725	24.206	47.3578	23.1108	19.06	17.9024
k__Bacteria|p__Actinobacteria|c__Actinobacteria	29.0797	21.878	32.6626	23.8221	14.9299	15.4249	0.47953	24.9896	57.1131	53.9637	38.7622	52.8517	22.752	26.4974	47.0507	23.8683	12.0003	26.3186	13.0797	28.2897	17.2346	56.5866	48.4066	73.9375	43.146	47.4773	7.87065	3.84324	3.28484	6.98187	26.4964	26.6642	15.9144	35.5251	17.5502	23.562	46.2286	27.8925	20.8259	16.4728	17.6405	19.3222	2.78442	24.8743	24.1091	47.3047	22.724	18.876	17.8366
k__Bacteria|p__Actinobacteria|c__Actinobacteria|o__Actinomycetales	17.7556	13.2528	12.3254	14.225	13.3743	4.50642	0.47953	0.30147	15.3371	24.7887	11.221	14.0134	10.3342	10.2933	22.3126	7.25906	5.89743	15.3263	4.85074	12.9514	7.92257	37.8267	31.1259	59.0404	22.4559	27.7543	3.25963	2.62867	1.53074	2.09695	11.5586	19.084	13.6796	27.7884	7.62902	10.4385	24.372	15.5742	11.3379	6.12998	9.43026	6.12011	1.37025	13.1262	10.9491	35.2593	19.9122	5.90043	3.6928
k__Bacteria|p__Actinobacteria|c__Actinobacteria|o__Actinomycetales|f__Actinomycetaceae	17.7556	13.2528	12.3254	14.225	13.3743	4.50642	0.47953	0.30147	15.3371	24.7887	11.221	14.0134	10.3342	10.2933	22.3126	7.25906	5.89743	15.3263	4.85074	12.9514	7.92257	37.8267	31.1259	59.0404	22.4559	27.7543	3.25963	2.62867	1.53074	2.09695	11.5586	19.084	13.6796	27.7884	7.62902	10.4385	24.372	15.5742	11.3379	6.12998	9.43026	6.12011	1.37025	13.1262	10.9491	35.2593	19.9122	5.90043	3.6928
k__Bacteria|p__Actinobacteria|c__Actinobacteria|o__Actinomycetales|f__Actinomycetaceae|g__Actinobaculum	2.42606	0.01104	2.94099	0	0.0162	0	0	0	4.289	7.15986	2.90566	0.90961	1.31513	1.03555	4.63951	0.2684	0.16906	7.66404	0.24506	3.08843	3.25658	0	3.00492	0.05692	1.74751	0	0.08221	0.50907	0.02493	0.0501	0.92963	0.2988	1.42437	0.21659	0.41296	1.33303	3.33162	2.58073	3.41755	1.37418	5.89282	0.01379	0.12849	1.17233	2.04583	0.38072	0.02692	0.64409	0.94191
k__Bacteria|p__Actinobacteria|c__Actinobacteria|o__Actinomycetales|f__Actinomycetaceae|g__Actinobaculum|s__Actinobaculum_sp_oral_taxon_183	2.42606	0.01104	2.94099	0	0.0162	0	0	0	4.289	7.15986	2.90566	0.90961	1.31513	1.03555	4.63951	0.2684	0.16906	7.66404	0.24506	3.08843	3.25658	0	3.00492	0.05692	1.74751	0	0.08221	0.50907	0.02493	0.0501	0.92963	0.2988	1.42437	0.21659	0.41296	1.33303	3.33162	2.58073	3.41755	1.37418	5.89282	0.01379	0.12849	1.17233	2.04583	0.38072	0.02692	0.64409	0.94191
k__Bacteria|p__Actinobacteria|c__Actinobacteria|o__Actinomycetales|f__Actinomycetaceae|g__Actinomyces	15.3296	13.2418	9.3844	14.225	13.3581	4.50642	0.47953	0.30147	11.0481	17.6288	8.31536	13.1038	9.01908	9.25771	17.6731	6.99067	5.72837	7.66224	4.60568	9.86299	4.66598	37.8267	28.121	58.9835	20.7083	27.7543	3.17742	2.1196	1.5058	2.04685	10.6289	18.7852	12.2553	27.5718	7.21606	9.10547	21.0403	12.9935	7.92035	4.7558	3.53744	6.10633	1.24176	11.9539	8.90327	34.8786	19.8852	5.25634	2.75089
k__Bacteria|p__Actinobacteria|c__Actinobacteria|o__Actinomycetales|f__Actinomycetaceae|g__Actinomyces|s__Actinomyces_cardiffensis	0	0.22988	0.08237	0	10.7603	0	0	0	0	0	0	0	0.24599	0.01704	0	0.00224	0.01266	0.23844	0.10468	0.00934	0	0	0	0	0	0	0.00069	0.0697	0.21444	0	0	0	0.02598	0.10613	0.26312	1.36947	0	0	0	0	0	0.07994	0.20619	0.00188	0.00071	0	0	0	0.00389
k__Bacteria|p__Actinobacteria|c__Actinobacteria|o__Actinomycetales|f__Actinomycetaceae|g__Actinomyces|s__Actinomyces_georgiae	0	0.06048	0.1985	0	0	0	0	0	0.24511	0.28901	0.12448	0.1513	0.04185	0.05623	0.07787	0	0	0.03661	0.02663	0.05664	0.01202	0	0.00209	0.00428	0.15942	0	0	0.02522	0.02702	0	0	0	0	0.06817	0	0.01014	0.14013	0.18204	0.00867	0.02631	0.0391	0.13405	0.01448	0.1463	0.21363	0.00295	0	0.08382	0.04932
k__Bacteria|p__Actinobacteria|c__Actinobacteria|o__Actinomycetales|f__Actinomycetaceae|g__Actinomyces|s__Actinomyces_graevenitzii	0	0	0	0	0	0	0	0	0	0	0	0	0	0	0	0.05414	0.00524	0.00154	0.0032	0	0.01314	0	0	0	0	0	0.19077	0	0	0	0	0	0	0	0	0	0	0	0	0	0	0	0	0	0	0	0	0.01987	0.00378
k__Bacteria|p__Actinobacteria|c__Actinobacteria|o__Actinomycetales|f__Actinomycetaceae|g__Actinomyces|s__Actinomyces_hongkongensis	0	0.13354	0.13684	0	0.00748	0	0	0	0.10891	0.15763	0.10872	0.05246	0.13157	0.14901	0.10194	0	0.00108	0.06363	0.06308	0.10948	0.02107	0	0	0.00611	0.08479	0	0	0.00756	0.00309	0	0	0	0	0.05627	0.01528	0.03359	0.14401	0.23424	0.0713	0	0.00957	0.34771	0.02292	0.27859	0.27102	0.00488	0	0.17544	0.11113
k__Bacteria|p__Actinobacteria|c__Actinobacteria|o__Actinomycetales|f__Actinomycetaceae|g__Actinomyces|s__Actinomyces_johnsonii	0.16314	0.56862	0	0	0.03986	0.16066	0	0	0.96147	1.04342	0.08701	0.07248	0.87186	1.96766	2.09247	0	0.0004	0.67181	0.12477	1.96051	0.52831	0	0.03986	0.10671	8.91434	0	0	0.39454	0.01837	0.05439	0.43737	0.08185	0.00385	0.20964	2.67075	0.9209	3.13493	2.53741	0.48942	1.06326	0.80897	0.1006	0.01486	0.12861	0.54415	21.8026	9.13856	0.05564	0.04014
k__Bacteria|p__Actinobacteria|c__Actinobacteria|o__Actinomycetales|f__Actinomycetaceae|g__Actinomyces|s__Actinomyces_massiliensis	0.44569	0.08058	1.46673	0.55443	0.05079	0.49532	0	0	1.34375	2.98521	1.32588	1.84022	0.10217	0.5975	0.71609	0.0642	0.02513	0.21787	0.11929	0.56381	0.36106	14.0581	3.44661	6.38813	1.18108	11.8085	0.02014	0.04299	0.01725	0.22341	1.61451	0.2046	0.56523	1.96079	0.89092	0.34466	6.12754	1.71466	1.04104	1.60257	0.19725	0.04098	0.01171	0.75072	0.95854	0.04246	0.00109	0.00909	0.0272
k__Bacteria|p__Actinobacteria|c__Actinobacteria|o__Actinomycetales|f__Actinomycetaceae|g__Actinomyces|s__Actinomyces_meyeri	0	0	0	0	0	0	0	0	0	0	0.2488	0.09024	0	0	0.02542	0	0	0.00051	0	0	0	0	0	0	0.10061	0	0	0	0	0	0	0	0	0	0.06487	0.02248	0	0	0.00813	0.22737	0.1625	0.01677	0.01868	0.00036	0.00325	0.00155	0	0.00511	0.00484
k__Bacteria|p__Actinobacteria|c__Actinobacteria|o__Actinomycetales|f__Actinomycetaceae|g__Actinomyces|s__Actinomyces_naeslundii	4.65458	2.98285	0.86092	8.78945	0.17304	0.99435	0	0.30147	3.41023	3.33865	1.28047	2.9711	4.59537	2.66947	5.90732	0.5419	0.53209	1.42958	0.4842	0.5927	0.5256	0	6.71518	5.89179	3.65373	2.32365	0.08656	0.30717	0.16863	0.54843	0	0	1.55667	2.19021	0.28101	1.54564	8.04059	3.52197	1.17667	0.85672	1.08189	0.79372	0.11416	6.3284	2.31186	0.59696	0.18427	0.09118	0.11058
k__Bacteria|p__Actinobacteria|c__Actinobacteria|o__Actinomycetales|f__Actinomycetaceae|g__Actinomyces|s__Actinomyces_odontolyticus	5.42039	3.52041	0.07524	1.03672	0.09096	0	0	0	0.00967	0.02837	0.10658	0.0287	0	0.00238	0.2046	5.59722	3.82166	0.42319	1.08347	1.91594	0.05052	0	0.08665	0.12354	0.10878	0	2.25534	0.05989	0.03409	0.10204	0	0.14792	0.11617	0.1438	0.0955	0.05389	0.15309	0.10178	0.01479	0	0	0.57991	0.08617	0.55467	0.20666	0.00615	0.00821	0.82506	0.65469
k__Bacteria|p__Actinobacteria|c__Actinobacteria|o__Actinomycetales|f__Actinomycetaceae|g__Actinomyces|s__Actinomyces_oris	4.318	3.93916	2.28527	3.84438	1.26572	2.65332	0.47953	0	0.61433	2.07524	0.79688	4.02109	0.43172	0.90932	3.46385	0.28031	0.17345	1.07975	0.62284	0.98145	1.17878	23.7686	9.28718	9.0387	2.78408	13.6221	0.09619	0.60954	0.63281	0.85233	6.92726	11.2777	0.73465	5.07305	0.43634	0.44221	1.84552	1.48362	0.78942	0.61684	0.61353	0.87858	0.15101	1.02831	0.79949	8.1125	7.51337	0.89521	0.79374
k__Bacteria|p__Actinobacteria|c__Actinobacteria|o__Actinomycetales|f__Actinomycetaceae|g__Actinomyces|s__Actinomyces_sp_HMSC035G02	0	0.0109	0	0	0.00773	0	0	0	0	0	0	0	0	0	0	0.09313	0.06962	0.02349	0.05851	0.02599	0.00227	0	0	0.00462	0	0	0.13208	0	0.00098	0	0	0	0	0	0	0	0	0	0	0	0	0.01819	0.00085	0.00146	0	0	0	0.05498	0.02412
k__Bacteria|p__Actinobacteria|c__Actinobacteria|o__Actinomycetales|f__Actinomycetaceae|g__Actinomyces|s__Actinomyces_sp_HPA0247	0	0.00228	0	0	0.01252	0	0	0	0	0	0	0	0	0	0	0.00064	0	0.01635	0.02565	0.02018	0	0	0	0	0	0	0.0047	0	0	0	0	0	0	0	0	0	0	0	0	0	0	0.04097	0.02544	0.00241	0	0	0	0.04334	0.04123
k__Bacteria|p__Actinobacteria|c__Actinobacteria|o__Actinomycetales|f__Actinomycetaceae|g__Actinomyces|s__Actinomyces_sp_ICM47	0	0.00293	0	0	0	0	0	0	0	0	0	0	0	0	0	0.00611	0	0.00116	0.00319	0	0.02812	0	0	0.00147	0	0	0.02152	0	0	0	0	0	0	0	0	0	0	0	0	0	0	0	0	0	0	0	0	0.02097	0.00857
k__Bacteria|p__Actinobacteria|c__Actinobacteria|o__Actinomycetales|f__Actinomycetaceae|g__Actinomyces|s__Actinomyces_sp_S6_Spd3	0	0	0	0	0	0	0	0	0	0	0	0	0	0	0	0.00182	0	0.02427	0.00915	0	0	0	0	0	0	0	0.0043	0.00143	0	0	0	0	0	0	0	0	0	0	0	0	0	0	0	0	0	0	0	0.01874	0.00146
k__Bacteria|p__Actinobacteria|c__Actinobacteria|o__Actinomycetales|f__Actinomycetaceae|g__Actinomyces|s__Actinomyces_sp_oral_taxon_170	0	0	0.03068	0	0	0	0	0	3.93083	7.29462	0.00208	0.018	0.0992	0.72664	0	0.00098	0.00734	0	0	0.0307	0	0	0.01336	0.00362	0	0	0	0	0	0	0	0	0	0	0	0	0	0	0	0.00362	0.01633	0.00373	0.00095	0.18792	0.49083	3.07531	0.6865	0	0
k__Bacteria|p__Actinobacteria|c__Actinobacteria|o__Actinomycetales|f__Actinomycetaceae|g__Actinomyces|s__Actinomyces_sp_oral_taxon_180	0.03804	0.49616	0.01709	0	0.37363	0	0	0	0	0	0.00489	0.01349	0	0	0	0.00857	0.00133	1.27975	0.35164	0.0376	0.09286	0	0.09555	0.05885	0	0	0.03726	0.0751	0.02868	0	0	4.97492	0.00677	0.69452	0	0	0	0	0.18267	0	0.11688	0.77314	0.16333	0.00049	0	0.31492	1.00244	0.41366	0.14548
k__Bacteria|p__Actinobacteria|c__Actinobacteria|o__Actinomycetales|f__Actinomycetaceae|g__Actinomyces|s__Actinomyces_sp_oral_taxon_181	0	0	0	0	0	0	0	0	0	0	0	0	0	0	0	0.00506	0	0	0.00192	0	0	0	0	0	0	0	0.02426	0	0	0	0	0	0	0	0	0	0	0	0	0	0	0	0	0	0	0	0	0	0
k__Bacteria|p__Actinobacteria|c__Actinobacteria|o__Actinomycetales|f__Actinomycetaceae|g__Actinomyces|s__Actinomyces_sp_oral_taxon_414	0.27337	0.95645	3.21366	0	0.56725	0.20278	0	0	0.25889	0.40544	0.55471	0.50793	1.48327	1.27942	1.59994	0.32789	1.07836	1.46505	0.56506	2.54682	1.13667	0	0.45751	0.5281	1.06328	0	0.29492	0.32111	0.23448	0.26625	1.42096	0.78169	0.51659	0.89372	2.20567	4.11976	1.41454	1.95018	0.87694	0.14206	0	1.08937	0.24061	2.08488	3.02414	0.61603	1.20442	1.75953	0.4965
k__Bacteria|p__Actinobacteria|c__Actinobacteria|o__Actinomycetales|f__Actinomycetaceae|g__Actinomyces|s__Actinomyces_sp_oral_taxon_448	0	0	0.04687	0	0	0	0	0	0.16449	0.01124	3.26305	2.9793	0.00655	0	3.48178	0.00646	0	0	0	0	0	0	6.68008	36.5013	0.01573	0	0.0087	0	0	0	0	0	7.88414	15.1293	0	0	0	0.5819	3.26128	0.21706	0.49142	0.00503	0.00579	0.00563	0.00923	0.26368	0.14526	0.00675	0.00435
k__Bacteria|p__Actinobacteria|c__Actinobacteria|o__Actinomycetales|f__Actinomycetaceae|g__Actinomyces|s__Actinomyces_sp_oral_taxon_897	0.01639	0.24489	0.97023	0	0.00884	0	0	0	0.00044	0	0.4118	0.35748	1.00951	0.88305	0.00183	0	0	0.68925	0.9584	1.01183	0.71557	0	0.95578	0.3126	2.6425	0	0	0.20535	0.12596	0	0.22882	1.31649	0.8452	1.04624	0.2926	0.24272	0.03999	0.68566	0	0	0	1.20364	0.1646	0.45325	0.06975	0.03854	0.00112	0.77794	0.22986
k__Bacteria|p__Actinobacteria|c__Actinobacteria|o__Actinomycetales|f__Actinomycetaceae|g__Actinomyces|s__Actinomyces_viscosus	0	0.01265	0	0	0	0	0	0	0	0	0	0	0	0	0	0	0	0	0	0	0	0	0.34111	0.01368	0	0	0	0	0	0	0	0	0	0	0	0	0	0	0	0	0	0	0	0	0	0	0	0	0
k__Bacteria|p__Actinobacteria|c__Actinobacteria|o__Bifidobacteriales	0	0	0.00082	0	1.19828	0	0	0	0	0	0	0	0.00231	0.00285	0	0	0	0.13875	0.07825	0	0	0	0.25255	1.77719	0	0	0.02771	0.03173	0.38776	0	0	5.27235	0.06941	4.22774	0	0	0	0	0	0	0.01867	0.00408	0	0.0084	0.00664	0.0137	0.00325	0.00284	0.00097
k__Bacteria|p__Actinobacteria|c__Actinobacteria|o__Bifidobacteriales|f__Bifidobacteriaceae	0	0	0.00082	0	1.19828	0	0	0	0	0	0	0	0.00231	0.00285	0	0	0	0.13875	0.07825	0	0	0	0.25255	1.77719	0	0	0.02771	0.03173	0.38776	0	0	5.27235	0.06941	4.22774	0	0	0	0	0	0	0.01867	0.00408	0	0.0084	0.00664	0.0137	0.00325	0.00284	0.00097
k__Bacteria|p__Actinobacteria|c__Actinobacteria|o__Bifidobacteriales|f__Bifidobacteriaceae|g__Aeriscardovia	0	0	0	0	0	0	0	0	0	0	0	0	0	0	0	0	0	0	0	0	0	0	0	0	0	0	0	0	0	0	0	0	0	0	0	0	0	0	0	0	0	0.00408	0	0.0084	0.00664	0.0137	0.00325	0.00248	0.00097
k__Bacteria|p__Actinobacteria|c__Actinobacteria|o__Bifidobacteriales|f__Bifidobacteriaceae|g__Aeriscardovia|s__Aeriscardovia_aeriphila	0	0	0	0	0	0	0	0	0	0	0	0	0	0	0	0	0	0	0	0	0	0	0	0	0	0	0	0	0	0	0	0	0	0	0	0	0	0	0	0	0	0.00408	0	0.0084	0.00664	0.0137	0.00325	0.00248	0.00097
k__Bacteria|p__Actinobacteria|c__Actinobacteria|o__Bifidobacteriales|f__Bifidobacteriaceae|g__Alloscardovia	0	0	0	0	0	0	0	0	0	0	0	0	0	0	0	0	0	0	0	0	0	0	0	0	0	0	0	0	0	0	0	0	0	0	0	0	0	0	0	0	0	0	0	0	0	0	0	0.00036	0
k__Bacteria|p__Actinobacteria|c__Actinobacteria|o__Bifidobacteriales|f__Bifidobacteriaceae|g__Alloscardovia|s__Alloscardovia_omnicolens	0	0	0	0	0	0	0	0	0	0	0	0	0	0	0	0	0	0	0	0	0	0	0	0	0	0	0	0	0	0	0	0	0	0	0	0	0	0	0	0	0	0	0	0	0	0	0	0.00036	0
k__Bacteria|p__Actinobacteria|c__Actinobacteria|o__Bifidobacteriales|f__Bifidobacteriaceae|g__Bifidobacterium	0	0	0	0	1.19828	0	0	0	0	0	0	0	0	0	0	0	0	0.04737	0.07825	0	0	0	0.03236	0.18651	0	0	0.02771	0.03173	0.38776	0	0	0	0.05641	1.87504	0	0	0	0	0	0	0	0	0	0	0	0	0	0	0
k__Bacteria|p__Actinobacteria|c__Actinobacteria|o__Bifidobacteriales|f__Bifidobacteriaceae|g__Bifidobacterium|s__Bifidobacterium_dentium	0	0	0	0	1.19828	0	0	0	0	0	0	0	0	0	0	0	0	0.04737	0.07825	0	0	0	0.03236	0.18651	0	0	0.02771	0.03173	0.38776	0	0	0	0.05641	1.87504	0	0	0	0	0	0	0	0	0	0	0	0	0	0	0
k__Bacteria|p__Actinobacteria|c__Actinobacteria|o__Bifidobacteriales|f__Bifidobacteriaceae|g__Parascardovia	0	0	0	0	0	0	0	0	0	0	0	0	0	0	0	0	0	0	0	0	0	0	0.20288	1.07524	0	0	0	0	0	0	0	0	0.013	1.88771	0	0	0	0	0	0	0	0	0	0	0	0	0	0	0
k__Bacteria|p__Actinobacteria|c__Actinobacteria|o__Bifidobacteriales|f__Bifidobacteriaceae|g__Parascardovia|s__Parascardovia_denticolens	0	0	0	0	0	0	0	0	0	0	0	0	0	0	0	0	0	0	0	0	0	0	0.20288	1.07524	0	0	0	0	0	0	0	0	0.013	1.88771	0	0	0	0	0	0	0	0	0	0	0	0	0	0	0
k__Bacteria|p__Actinobacteria|c__Actinobacteria|o__Bifidobacteriales|f__Bifidobacteriaceae|g__Scardovia	0	0	0.00082	0	0	0	0	0	0	0	0	0	0.00231	0.00285	0	0	0	0.09138	0	0	0	0	0.01731	0.51544	0	0	0	0	0	0	0	5.27235	0	0.46498	0	0	0	0	0	0	0.01867	0	0	0	0	0	0	0	0
k__Bacteria|p__Actinobacteria|c__Actinobacteria|o__Bifidobacteriales|f__Bifidobacteriaceae|g__Scardovia|s__Scardovia_wiggsiae	0	0	0.00082	0	0	0	0	0	0	0	0	0	0.00231	0.00285	0	0	0	0.09138	0	0	0	0	0.01731	0.51544	0	0	0	0	0	0	0	5.27235	0	0.46498	0	0	0	0	0	0	0.01867	0	0	0	0	0	0	0	0
k__Bacteria|p__Actinobacteria|c__Actinobacteria|o__Corynebacteriales	7.70131	7.88552	5.51184	7.59559	0.22092	2.39727	0	0.36824	40.9324	25.0961	24.9345	37.7581	8.47946	9.93185	20.0662	7.67364	1.38336	2.03494	4.70007	7.52041	4.76554	5.15028	14.1512	9.90992	15.8329	5.407	1.64065	0.45881	0.42633	2.10527	2.01018	0.02882	1.59197	1.94323	4.08678	7.75204	14.004	8.75913	9.36507	6.89261	4.72772	11.7635	0.9977	9.31106	10.565	0.37013	0.03599	10.0496	12.7029
k__Bacteria|p__Actinobacteria|c__Actinobacteria|o__Corynebacteriales|f__Corynebacteriaceae	7.70131	7.88552	5.51184	7.59559	0.22092	2.39727	0	0.36824	40.9324	25.0961	24.9345	37.7581	8.47946	9.93185	20.0662	7.67364	1.38336	2.03494	4.69746	7.52041	4.76554	5.15028	14.1512	9.90992	15.8329	5.407	1.64065	0.45881	0.39439	2.10527	2.01018	0.02882	1.59197	1.94323	4.08678	7.75204	14.004	8.75913	9.36507	6.89261	4.72772	11.7635	0.9977	9.31106	10.565	0.37013	0.03599	10.0496	12.7029
k__Bacteria|p__Actinobacteria|c__Actinobacteria|o__Corynebacteriales|f__Corynebacteriaceae|g__Corynebacterium	7.70131	7.88552	5.51184	7.59559	0.22092	2.39727	0	0.36824	40.9324	25.0961	24.9345	37.7581	8.47946	9.93185	20.0662	7.67364	1.38336	2.03494	4.69746	7.52041	4.76554	5.15028	14.1512	9.90992	15.8329	5.407	1.64065	0.45881	0.39439	2.10527	2.01018	0.02882	1.59197	1.94323	4.08678	7.75204	14.004	8.75913	9.36507	6.89261	4.72772	11.7635	0.9977	9.31106	10.565	0.37013	0.03599	10.0496	12.7029
k__Bacteria|p__Actinobacteria|c__Actinobacteria|o__Corynebacteriales|f__Corynebacteriaceae|g__Corynebacterium|s__Corynebacterium_atypicum	0	0	0	0	0	0	0	0	0	0	0	0	0	0	0	0	0	0	0	0	0	0	0	0	0	0	0	0	0	0	0	0	0	0	0	0	0	0	0	0	0	0.00173	0	0.00213	0.00246	0	0	0	0
k__Bacteria|p__Actinobacteria|c__Actinobacteria|o__Corynebacteriales|f__Corynebacteriaceae|g__Corynebacterium|s__Corynebacterium_durum	1.34344	0.04908	1.97195	0	0.02056	0.24792	0	0	1.31623	3.02097	0.2838	0.7595	0.20574	1.28062	0.8928	0.81198	0.3894	0.02606	0.0122	0.73636	0.75661	0	2.80339	1.44652	1.15926	0	0.19714	0	0	1.48706	0.29751	0	0.35561	0.36821	0.49538	1.80261	1.65581	0.20568	0.14161	1.83084	0.02127	0.01347	0.00576	0.83462	0.367	0.05626	0.00117	0.09499	0.18822
k__Bacteria|p__Actinobacteria|c__Actinobacteria|o__Corynebacteriales|f__Corynebacteriaceae|g__Corynebacterium|s__Corynebacterium_matruchotii	6.35786	7.83644	3.53989	7.59559	0.20036	2.14935	0	0.36824	39.6161	22.0751	24.6507	36.9986	8.27372	8.65123	19.1734	6.86166	0.99396	2.00888	4.68525	6.78405	4.00894	5.15028	11.3479	8.4634	14.6736	5.407	1.44352	0.45881	0.39439	0.6182	1.71267	0.02882	1.23636	1.57502	3.5914	5.94943	12.3482	8.55344	9.22346	5.06178	4.70645	11.7483	0.99194	8.47431	10.1955	0.31387	0.03482	9.95461	12.5147
k__Bacteria|p__Actinobacteria|c__Actinobacteria|o__Corynebacteriales|f__Corynebacteriales_unclassified	0	0	0	0	0	0	0	0	0	0	0	0	0	0	0	0	0	0	0.00261	0	0	0	0	0	0	0	0	0	0.03195	0	0	0	0	0	0	0	0	0	0	0	0	0	0	0	0	0	0	0	0
k__Bacteria|p__Actinobacteria|c__Actinobacteria|o__Corynebacteriales|f__Corynebacteriales_unclassified|g__Lawsonella	0	0	0	0	0	0	0	0	0	0	0	0	0	0	0	0	0	0	0.00261	0	0	0	0	0	0	0	0	0	0.03195	0	0	0	0	0	0	0	0	0	0	0	0	0	0	0	0	0	0	0	0
k__Bacteria|p__Actinobacteria|c__Actinobacteria|o__Corynebacteriales|f__Corynebacteriales_unclassified|g__Lawsonella|s__Lawsonella_clevelandensis	0	0	0	0	0	0	0	0	0	0	0	0	0	0	0	0	0	0	0.00261	0	0	0	0	0	0	0	0	0	0.03195	0	0	0	0	0	0	0	0	0	0	0	0	0	0	0	0	0	0	0	0
k__Bacteria|p__Actinobacteria|c__Actinobacteria|o__Micrococcales	3.00355	0.05414	2.77705	0	0.06698	1.06691	0	3.91529	0.25806	1.9245	1.84965	0.8544	0.89148	4.83205	3.38811	7.23682	1.89218	0.81058	0.89322	1.3612	2.75579	13.1651	0.94886	0.45635	2.25995	11.4729	2.55572	0.11681	0.18619	2.54014	6.17467	1.92034	0.24628	0.41109	0.95988	2.48553	5.30429	0.5498	0.12124	3.45019	2.50379	0.05326	0.04923	0.60057	0.32581	0.02075	0.0073	2.00452	0.6669
k__Bacteria|p__Actinobacteria|c__Actinobacteria|o__Micrococcales|f__Micrococcaceae	3.00355	0.05414	2.77705	0	0.06698	1.06691	0	3.91529	0.25806	1.9245	1.84965	0.8544	0.89148	4.83205	3.38811	7.23682	1.89218	0.81058	0.89322	1.3612	2.75579	13.1651	0.94886	0.45635	2.25995	11.4729	2.55572	0.11681	0.18619	2.54014	6.17467	1.92034	0.24628	0.41109	0.95988	2.48553	5.30429	0.5498	0.12124	3.45019	2.50379	0.05326	0.04923	0.60057	0.32581	0.02075	0.0073	2.00452	0.6669
k__Bacteria|p__Actinobacteria|c__Actinobacteria|o__Micrococcales|f__Micrococcaceae|g__Rothia	3.00355	0.05414	2.77705	0	0.06698	1.06691	0	3.91529	0.25806	1.9245	1.84965	0.8544	0.89148	4.83205	3.38811	7.23682	1.89218	0.81058	0.89322	1.3612	2.75579	13.1651	0.94886	0.45635	2.25995	11.4729	2.55572	0.11681	0.18619	2.54014	6.17467	1.92034	0.24628	0.41109	0.95988	2.48553	5.30429	0.5498	0.12124	3.45019	2.50379	0.05326	0.04923	0.60057	0.32581	0.02075	0.0073	2.00452	0.6669
k__Bacteria|p__Actinobacteria|c__Actinobacteria|o__Micrococcales|f__Micrococcaceae|g__Rothia|s__Rothia_aeria	2.5728	0.03164	2.23094	0	0.06698	0.90277	0	3.91529	0.05886	1.79258	0.01606	0.2362	0.66837	3.8588	1.48254	6.98461	1.8488	0.49198	0.80573	1.09197	2.55527	13.1651	0.93703	0.42631	1.19939	11.4729	2.54576	0.10895	0.16708	2.52004	6.05484	0.75817	0.24472	0.31795	0.86776	1.68624	3.09999	0.28129	0.07361	2.64171	0.60662	0.04361	0.03734	0.57342	0.30644	0.01736	0.0073	0.27413	0.18419
k__Bacteria|p__Actinobacteria|c__Actinobacteria|o__Micrococcales|f__Micrococcaceae|g__Rothia|s__Rothia_dentocariosa	0.43074	0.02251	0.54611	0	0	0.16414	0	0	0.19889	0.13152	1.83326	0.6182	0.21301	0.94864	1.88268	0.13064	0.01958	0.24914	0.06322	0.23141	0.15751	0	0	0.00461	1.06056	0	0.00413	0.00786	0.01911	0.0201	0.11983	1.14005	0	0	0.05524	0.75734	2.20088	0.26851	0.04763	0.80847	1.89717	0.0082	0.01189	0.02293	0.01515	0.00123	0	1.6996	0.45933
k__Bacteria|p__Actinobacteria|c__Actinobacteria|o__Micrococcales|f__Micrococcaceae|g__Rothia|s__Rothia_mucilaginosa	0	0	0	0	0	0	0	0	0.00031	0.00041	0.00033	0	0.0101	0.02461	0.02289	0.12156	0.02381	0.06946	0.02428	0.03781	0.04301	0	0.01182	0.02543	0	0	0.00583	0	0	0	0	0.02212	0.00156	0.09314	0.03689	0.04195	0.00342	0	0	0	0	0.00145	0	0.00422	0.00422	0.00217	0	0.03079	0.02338
k__Bacteria|p__Actinobacteria|c__Actinobacteria|o__Nakamurellales	0	0	0	0	0	0	0	0	0	0	0	0	0	0	0	0	0	0	0	0	0	0	0	0	0	0	0	0	0	0	0	0	0	0	0	0	0	0	0	0	0	0	0	0.00125	0	0.00093	0	0	0
k__Bacteria|p__Actinobacteria|c__Actinobacteria|o__Nakamurellales|f__Nakamurellaceae	0	0	0	0	0	0	0	0	0	0	0	0	0	0	0	0	0	0	0	0	0	0	0	0	0	0	0	0	0	0	0	0	0	0	0	0	0	0	0	0	0	0	0	0.00125	0	0.00093	0	0	0
k__Bacteria|p__Actinobacteria|c__Actinobacteria|o__Nakamurellales|f__Nakamurellaceae|g__Nakamurella	0	0	0	0	0	0	0	0	0	0	0	0	0	0	0	0	0	0	0	0	0	0	0	0	0	0	0	0	0	0	0	0	0	0	0	0	0	0	0	0	0	0	0	0.00125	0	0.00093	0	0	0
k__Bacteria|p__Actinobacteria|c__Actinobacteria|o__Nakamurellales|f__Nakamurellaceae|g__Nakamurella|s__Nakamurella_silvestris	0	0	0	0	0	0	0	0	0	0	0	0	0	0	0	0	0	0	0	0	0	0	0	0	0	0	0	0	0	0	0	0	0	0	0	0	0	0	0	0	0	0	0	0.00125	0	0.00093	0	0	0
k__Bacteria|p__Actinobacteria|c__Actinobacteria|o__Propionibacteriales	0.61915	0.68553	12.0474	2.00148	0.06943	7.45426	0	20.4046	0.58549	2.15443	0.757	0.2258	3.04453	1.43741	1.28378	1.69877	2.82739	8.00806	2.55743	6.45665	1.79074	0.4445	1.92804	2.75366	2.59736	2.84313	0.38693	0.60722	0.75381	0.23951	6.75303	0.35875	0.32706	1.1546	4.87455	2.88598	2.54836	3.00934	0.00166	0	0.96	1.38128	0.36724	1.82685	2.26264	11.6399	2.76532	0.91859	0.77303
k__Bacteria|p__Actinobacteria|c__Actinobacteria|o__Propionibacteriales|f__Propionibacteriaceae	0.61915	0.68553	12.0474	2.00148	0.06943	7.45426	0	20.4046	0.58549	2.15443	0.757	0.2258	3.04453	1.43741	1.28378	1.69877	2.82739	8.00806	2.55743	6.45665	1.79074	0.4445	1.92804	2.75366	2.59736	2.84313	0.38693	0.60722	0.75381	0.23951	6.75303	0.35875	0.32706	1.1546	4.87455	2.88598	2.54836	3.00934	0.00166	0	0.96	1.38128	0.36724	1.82685	2.26264	11.6399	2.76532	0.91859	0.77303
k__Bacteria|p__Actinobacteria|c__Actinobacteria|o__Propionibacteriales|f__Propionibacteriaceae|g__Propionibacterium	0	0	0	0	0	0	0	0	0	0	0	0	0	0	0	0	0	4.18588	1.14004	0	0	0	0.08822	2.61932	0	0	0.01462	0.01587	0.00228	0	0	0.35875	0	0.9869	0	0	0	0	0	0	0	0.02123	0	0	0.00373	0	0	0	0
k__Bacteria|p__Actinobacteria|c__Actinobacteria|o__Propionibacteriales|f__Propionibacteriaceae|g__Propionibacterium|s__Propionibacterium_acidifaciens	0	0	0	0	0	0	0	0	0	0	0	0	0	0	0	0	0	4.18588	1.14004	0	0	0	0.08822	2.61932	0	0	0.01462	0.01587	0.00228	0	0	0.35875	0	0.9869	0	0	0	0	0	0	0	0	0	0	0	0	0	0	0
k__Bacteria|p__Actinobacteria|c__Actinobacteria|o__Propionibacteriales|f__Propionibacteriaceae|g__Propionibacterium|s__Propionibacterium_australiense	0	0	0	0	0	0	0	0	0	0	0	0	0	0	0	0	0	0	0	0	0	0	0	0	0	0	0	0	0	0	0	0	0	0	0	0	0	0	0	0	0	0	0	0	0	0	0	0	0
k__Bacteria|p__Actinobacteria|c__Actinobacteria|o__Propionibacteriales|f__Propionibacteriaceae|g__Propionibacterium|s__Propionibacterium_sp_oral_taxon_192	0	0	0	0	0	0	0	0	0	0	0	0	0	0	0	0	0	0	0	0	0	0	0	0	0	0	0	0	0	0	0	0	0	0	0	0	0	0	0	0	0	0.02123	0	0	0.00373	0	0	0	0
k__Bacteria|p__Actinobacteria|c__Actinobacteria|o__Propionibacteriales|f__Propionibacteriaceae|g__Pseudopropionibacterium	0.61915	0.68553	12.0474	2.00148	0.06943	7.45426	0	20.4046	0.58549	2.15443	0.757	0.2258	3.04453	1.43741	1.28378	1.69877	2.82739	3.82218	1.41738	6.45665	1.79074	0.4445	1.83981	0.13434	2.59736	2.84313	0.3723	0.59135	0.75153	0.23951	6.75303	0	0.32706	0.16771	4.87455	2.88598	2.54836	3.00934	0.00166	0	0.96	1.36005	0.36724	1.82685	2.25891	11.6399	2.76532	0.91859	0.77303
k__Bacteria|p__Actinobacteria|c__Actinobacteria|o__Propionibacteriales|f__Propionibacteriaceae|g__Pseudopropionibacterium|s__Pseudopropionibacterium_propionicum	0.61915	0.68553	12.0474	2.00148	0.06943	7.45426	0	20.4046	0.58549	2.15443	0.757	0.2258	3.04453	1.43741	1.28378	1.69877	2.82739	3.82218	1.41738	6.45665	1.79074	0.4445	1.83981	0.13434	2.59736	2.84313	0.3723	0.59135	0.75153	0.23951	6.75303	0	0.32706	0.16771	4.87455	2.88598	2.54836	3.00934	0.00166	0	0.96	1.36005	0.36724	1.82685	2.25891	11.6399	2.76532	0.91859	0.77303
k__Bacteria|p__Actinobacteria|c__Coriobacteriia	0	0.04813	1.09841	0	3.23898	2.39603	0.09723	0	0	0.00685	0.17655	0.12889	0.11629	0.05808	0	0.00393	0.16948	3.12305	1.05063	0.13721	0.20899	0	0.19039	0.3369	0	0	0.25494	1.01994	3.06037	0.41005	0.75614	4.03523	0.84201	3.94463	0	0.02799	0	0.01034	0.02813	0.0526	0.25456	0.25071	0.48225	0.08984	0.09164	0.03705	0.38678	0.18158	0.06581
k__Bacteria|p__Actinobacteria|c__Coriobacteriia|o__Coriobacteriales	0	0.04792	1.05614	0	2.96276	2.35085	0.09723	0	0	0.00497	0.11374	0.11823	0.08866	0.05058	0	0.00393	0.14223	2.80394	0.98854	0.10095	0.16708	0	0.19039	0.32968	0	0	0.25494	0.70471	2.77322	0	0	3.90247	0.7938	3.45061	0	0.00445	0	0.01034	0.02813	0.0526	0.25456	0.21165	0.39022	0.07447	0.08749	0.03705	0.37137	0.15819	0.03841
k__Bacteria|p__Actinobacteria|c__Coriobacteriia|o__Coriobacteriales|f__Atopobiaceae	0	0.04792	1.05614	0	2.96276	2.35085	0.09723	0	0	0.00497	0.11374	0.11823	0.08866	0.05058	0	0.00393	0.14168	2.80199	0.98785	0.10095	0.16708	0	0.19039	0.32915	0	0	0.25494	0.70471	2.77201	0	0	3.90247	0.7938	3.45061	0	0.00445	0	0.01034	0.02813	0.0526	0.25456	0.18165	0.37231	0.05622	0.06554	0.01416	0.34585	0.14819	0.03524
k__Bacteria|p__Actinobacteria|c__Coriobacteriia|o__Coriobacteriales|f__Atopobiaceae|g__Atopobium	0	0.03661	0.3963	0	1.36665	0.98981	0.09723	0	0	0.00497	0.11374	0.11823	0.08273	0.05058	0	0	0	2.42772	0.84952	0.09022	0.16708	0	0.19039	0.32396	0	0	0.00436	0.21491	0.9206	0	0	2.97883	0.71682	3.13232	0	0	0	0.01034	0.02813	0.0526	0.25456	0.09036	0.11074	0.04048	0.03971	0	0.00575	0.13244	0.03382
k__Bacteria|p__Actinobacteria|c__Coriobacteriia|o__Coriobacteriales|f__Atopobiaceae|g__Atopobium|s__Atopobium_deltae	0	0	0	0	0	0	0	0	0	0	0	0	0	0	0	0	0	0.00599	0	0.02179	0	0	0	0.0015	0	0	0	0	0.00235	0	0	0	0	0	0	0	0	0	0	0	0	0	0	0	0	0	0.00575	0	0
k__Bacteria|p__Actinobacteria|c__Coriobacteriia|o__Coriobacteriales|f__Atopobiaceae|g__Atopobium|s__Atopobium_parvulum	0	0.01911	0	0	0.19741	0	0	0	0	0	0	0.0036	0.00985	0.00775	0	0	0	0.73418	0.176	0.02207	0.01599	0	0.01991	0.02899	0	0	0	0.03896	0.02341	0	0	0.19611	0	0.04672	0	0	0	0.01034	0.02654	0.0526	0.23425	0.0457	0.00468	0.02471	0.00477	0	0	0.07527	0.02174
k__Bacteria|p__Actinobacteria|c__Coriobacteriia|o__Coriobacteriales|f__Atopobiaceae|g__Atopobium|s__Atopobium_rimae	0	0.01749	0.3963	0	1.16924	0.98981	0.09723	0	0	0.00497	0.11374	0.11463	0.07289	0.04283	0	0	0	1.68755	0.67353	0.04636	0.15109	0	0.17047	0.29347	0	0	0.00436	0.17595	0.89484	0	0	2.78272	0.71682	3.0856	0	0	0	0	0.0016	0	0.02031	0.04466	0.10606	0.01576	0.03494	0	0	0.05717	0.01208
k__Bacteria|p__Actinobacteria|c__Coriobacteriia|o__Coriobacteriales|f__Atopobiaceae|g__Olsenella	0	0.01132	0.65984	0	1.59611	1.36103	0	0	0	0	0	0	0.00592	0	0	0.00393	0.14168	0.37427	0.13833	0.01073	0	0	0	0.00519	0	0	0.25058	0.48981	1.85141	0	0	0.92364	0.07698	0.3183	0	0.00445	0	0	0	0	0	0.09129	0.26157	0.01575	0.02583	0.01416	0.34009	0.01574	0.00143
k__Bacteria|p__Actinobacteria|c__Coriobacteriia|o__Coriobacteriales|f__Atopobiaceae|g__Olsenella|s__Olsenella_profusa	0	0	0.03711	0	0.09802	0	0	0	0	0	0	0	0	0	0	0.0026	0.0236	0.03913	0.03477	0.0027	0	0	0	0	0	0	0.08582	0.04815	0.14441	0	0	0.03121	0	0.0203	0	0	0	0	0	0	0	0.02481	0.03819	0.00702	0.01231	0.00556	0.06617	0.00368	0
k__Bacteria|p__Actinobacteria|c__Coriobacteriia|o__Coriobacteriales|f__Atopobiaceae|g__Olsenella|s__Olsenella_scatoligenes	0	0	0.0119	0	0.06584	0	0	0	0	0	0	0	0	0	0	0	0.00378	0.00913	0.0081	0	0	0	0	0.00147	0	0	0.06972	0.00945	0.06708	0	0	0.00641	0	0.02801	0	0	0	0	0	0	0	0.01948	0.02057	0.00707	0.00988	0.0086	0.0381	0.00203	0.00143
k__Bacteria|p__Actinobacteria|c__Coriobacteriia|o__Coriobacteriales|f__Atopobiaceae|g__Olsenella|s__Olsenella_uli	0	0.01132	0.61084	0	1.43225	1.36103	0	0	0	0	0	0	0.00592	0	0	0.00133	0.11431	0.326	0.09546	0.00803	0	0	0	0.00372	0	0	0.09504	0.43221	1.63992	0	0	0.88601	0.07698	0.26998	0	0.00445	0	0	0	0	0	0.047	0.20282	0.00166	0.00364	0	0.23582	0.01003	0
k__Bacteria|p__Actinobacteria|c__Coriobacteriia|o__Coriobacteriales|f__Coriobacteriaceae	0	0	0	0	0	0	0	0	0	0	0	0	0	0	0	0	0.00055	0.00195	0.00069	0	0	0	0	0.00053	0	0	0	0	0.00121	0	0	0	0	0	0	0	0	0	0	0	0	0.03	0.01791	0.01824	0.02195	0.02289	0.02553	0.01	0.00317
k__Bacteria|p__Actinobacteria|c__Coriobacteriia|o__Coriobacteriales|f__Coriobacteriaceae|g__Collinsella	0	0	0	0	0	0	0	0	0	0	0	0	0	0	0	0	0	0.00053	0	0	0	0	0	0	0	0	0	0	0	0	0	0	0	0	0	0	0	0	0	0	0	0.01337	0.0042	0.00689	0.00955	0.00934	0.00589	0.00604	0.00161
k__Bacteria|p__Actinobacteria|c__Coriobacteriia|o__Coriobacteriales|f__Coriobacteriaceae|g__Collinsella|s__Collinsella_aerofaciens	0	0	0	0	0	0	0	0	0	0	0	0	0	0	0	0	0	0.00053	0	0	0	0	0	0	0	0	0	0	0	0	0	0	0	0	0	0	0	0	0	0	0	0.00553	0	0.00285	0.00187	0.0034	0	0.00226	0.00161
k__Bacteria|p__Actinobacteria|c__Coriobacteriia|o__Coriobacteriales|f__Coriobacteriaceae|g__Collinsella|s__Collinsella_intestinalis	0	0	0	0	0	0	0	0	0	0	0	0	0	0	0	0	0	0	0	0	0	0	0	0	0	0	0	0	0	0	0	0	0	0	0	0	0	0	0	0	0	0.00326	0.0009	0.00188	0.00397	0.00403	0.00589	0.00278	0
k__Bacteria|p__Actinobacteria|c__Coriobacteriia|o__Coriobacteriales|f__Coriobacteriaceae|g__Collinsella|s__Collinsella_stercoris	0	0	0	0	0	0	0	0	0	0	0	0	0	0	0	0	0	0	0	0	0	0	0	0	0	0	0	0	0	0	0	0	0	0	0	0	0	0	0	0	0	0.00458	0.0033	0.00216	0.00371	0.00191	0	0.001	0
k__Bacteria|p__Actinobacteria|c__Coriobacteriia|o__Coriobacteriales|f__Coriobacteriaceae|g__Enorma	0	0	0	0	0	0	0	0	0	0	0	0	0	0	0	0	0.00055	0.00142	0.00069	0	0	0	0	0.00053	0	0	0	0	0.00121	0	0	0	0	0	0	0	0	0	0	0	0	0.01663	0.01371	0.01136	0.0124	0.01355	0.01964	0.00396	0.00156
k__Bacteria|p__Actinobacteria|c__Coriobacteriia|o__Coriobacteriales|f__Coriobacteriaceae|g__Enorma|s__Enorma_massiliensis	0	0	0	0	0	0	0	0	0	0	0	0	0	0	0	0	0	0	0	0	0	0	0	0	0	0	0	0	0	0	0	0	0	0	0	0	0	0	0	0	0	0.00299	0.00423	0.0008	0	0.00043	0.00572	0	0
k__Bacteria|p__Actinobacteria|c__Coriobacteriia|o__Coriobacteriales|f__Coriobacteriaceae|g__Enorma|s__[Collinsella]_massiliensis	0	0	0	0	0	0	0	0	0	0	0	0	0	0	0	0	0.00055	0.00142	0.00069	0	0	0	0	0.00053	0	0	0	0	0.00121	0	0	0	0	0	0	0	0	0	0	0	0	0.01364	0.00947	0.01055	0.0124	0.01312	0.01392	0.00396	0.00156
k__Bacteria|p__Actinobacteria|c__Coriobacteriia|o__Eggerthellales	0	0.00021	0.04226	0	0.27622	0.04519	0	0	0	0.00188	0.06281	0.01066	0.02763	0.00751	0	0	0.02725	0.31911	0.06209	0.03626	0.04191	0	0	0.00723	0	0	0	0.31523	0.28715	0.41005	0.75614	0.13276	0.04822	0.49401	0	0.02354	0	0	0	0	0	0.03906	0.09203	0.01537	0.00416	0	0.01541	0.02339	0.0274
k__Bacteria|p__Actinobacteria|c__Coriobacteriia|o__Eggerthellales|f__Eggerthellaceae	0	0.00021	0.04226	0	0.27622	0.04519	0	0	0	0.00188	0.06281	0.01066	0.02763	0.00751	0	0	0.02725	0.31911	0.06209	0.03626	0.04191	0	0	0.00723	0	0	0	0.31523	0.28715	0.41005	0.75614	0.13276	0.04822	0.49401	0	0.02354	0	0	0	0	0	0.03906	0.09203	0.01537	0.00416	0	0.01541	0.02339	0.0274
k__Bacteria|p__Actinobacteria|c__Coriobacteriia|o__Eggerthellales|f__Eggerthellaceae|g__Denitrobacterium	0	0	0	0	0	0	0	0	0	0	0	0	0	0	0	0	0	0	0	0	0	0	0	0	0	0	0	0	0	0	0	0	0	0	0	0	0	0	0	0	0	0.00049	0	0	0	0	0	0	0
k__Bacteria|p__Actinobacteria|c__Coriobacteriia|o__Eggerthellales|f__Eggerthellaceae|g__Denitrobacterium|s__Denitrobacterium_detoxificans	0	0	0	0	0	0	0	0	0	0	0	0	0	0	0	0	0	0	0	0	0	0	0	0	0	0	0	0	0	0	0	0	0	0	0	0	0	0	0	0	0	0.00049	0	0	0	0	0	0	0
k__Bacteria|p__Actinobacteria|c__Coriobacteriia|o__Eggerthellales|f__Eggerthellaceae|g__Enterorhabdus	0	0	0	0	0	0	0	0	0	0	0	0	0	0	0	0	0	0	0	0	0	0	0	0	0	0	0	0	0	0	0	0	0	0	0	0	0	0	0	0	0	0.00033	0	0.00029	0	0	0	0	0
k__Bacteria|p__Actinobacteria|c__Coriobacteriia|o__Eggerthellales|f__Eggerthellaceae|g__Enterorhabdus|s__Enterorhabdus_caecimuris	0	0	0	0	0	0	0	0	0	0	0	0	0	0	0	0	0	0	0	0	0	0	0	0	0	0	0	0	0	0	0	0	0	0	0	0	0	0	0	0	0	0.00033	0	0.00029	0	0	0	0	0
k__Bacteria|p__Actinobacteria|c__Coriobacteriia|o__Eggerthellales|f__Eggerthellaceae|g__Slackia	0	0.00021	0.04226	0	0.27622	0.04519	0	0	0	0.00188	0.06281	0.01066	0.02763	0.00751	0	0	0.02725	0.31911	0.06209	0.03626	0.04191	0	0	0.00723	0	0	0	0.31523	0.28715	0.41005	0.75614	0.13276	0.04822	0.49401	0	0.02354	0	0	0	0	0	0.03824	0.09203	0.01508	0.00416	0	0.01541	0.02339	0.0274
k__Bacteria|p__Actinobacteria|c__Coriobacteriia|o__Eggerthellales|f__Eggerthellaceae|g__Slackia|s__Slackia_exigua	0	0.00021	0.04226	0	0.27622	0.04519	0	0	0	0.00188	0.06281	0.01066	0.02763	0.00751	0	0	0.02725	0.31864	0.06209	0.03626	0.04191	0	0	0.00723	0	0	0	0.31523	0.28715	0.41005	0.75614	0.13276	0.04822	0.49401	0	0.02354	0	0	0	0	0	0.03672	0.08915	0.01364	0.00334	0	0.01541	0.02339	0.0274
k__Bacteria|p__Actinobacteria|c__Coriobacteriia|o__Eggerthellales|f__Eggerthellaceae|g__Slackia|s__Slackia_isoflavoniconvertens	0	0	0	0	0	0	0	0	0	0	0	0	0	0	0	0	0	0.00047	0	0	0	0	0	0	0	0	0	0	0	0	0	0	0	0	0	0	0	0	0	0	0	0.00152	0.00288	0.00144	0.00081	0	0	0	0
k__Bacteria|p__Actinobacteria|c__Rubrobacteria	0	0	0	0	0	0	0	0	0	0	0	0	0	0	0	0	0	0	0	0	0	0	0	0	0	0	0	0	0	0	0	0	0	0	0	0	0	0	0	0	0	0	0	0.00137	0	0.00102	0	0.00056	0
k__Bacteria|p__Actinobacteria|c__Rubrobacteria|o__Rubrobacterales	0	0	0	0	0	0	0	0	0	0	0	0	0	0	0	0	0	0	0	0	0	0	0	0	0	0	0	0	0	0	0	0	0	0	0	0	0	0	0	0	0	0	0	0.00137	0	0.00102	0	0.00056	0
k__Bacteria|p__Actinobacteria|c__Rubrobacteria|o__Rubrobacterales|f__Rubrobacteraceae	0	0	0	0	0	0	0	0	0	0	0	0	0	0	0	0	0	0	0	0	0	0	0	0	0	0	0	0	0	0	0	0	0	0	0	0	0	0	0	0	0	0	0	0.00137	0	0.00102	0	0.00056	0
k__Bacteria|p__Actinobacteria|c__Rubrobacteria|o__Rubrobacterales|f__Rubrobacteraceae|g__Rubrobacter	0	0	0	0	0	0	0	0	0	0	0	0	0	0	0	0	0	0	0	0	0	0	0	0	0	0	0	0	0	0	0	0	0	0	0	0	0	0	0	0	0	0	0	0.00137	0	0.00102	0	0.00056	0
k__Bacteria|p__Actinobacteria|c__Rubrobacteria|o__Rubrobacterales|f__Rubrobacteraceae|g__Rubrobacter|s__Rubrobacter_radiotolerans	0	0	0	0	0	0	0	0	0	0	0	0	0	0	0	0	0	0	0	0	0	0	0	0	0	0	0	0	0	0	0	0	0	0	0	0	0	0	0	0	0	0	0	0.00137	0	0.00102	0	0.00056	0
k__Bacteria|p__Actinobacteria|c__Thermoleophilia	0	0	0	0	0	0	0	0	0	0	0	0	0	0	0	0	0	0	0	0	0	0	0	0	0	0	0	0	0	0	0	0	0	0	0	0	0	0	0	0	0	0.00363	0.00422	0.00691	0.00516	0.01502	0	0.00187	0
k__Bacteria|p__Actinobacteria|c__Thermoleophilia|o__Solirubrobacterales	0	0	0	0	0	0	0	0	0	0	0	0	0	0	0	0	0	0	0	0	0	0	0	0	0	0	0	0	0	0	0	0	0	0	0	0	0	0	0	0	0	0	0	0	0	0	0	0	0
k__Bacteria|p__Actinobacteria|c__Thermoleophilia|o__Solirubrobacterales|f__Patulibacteraceae	0	0	0	0	0	0	0	0	0	0	0	0	0	0	0	0	0	0	0	0	0	0	0	0	0	0	0	0	0	0	0	0	0	0	0	0	0	0	0	0	0	0	0	0	0	0	0	0	0
k__Bacteria|p__Actinobacteria|c__Thermoleophilia|o__Solirubrobacterales|f__Patulibacteraceae|g__Patulibacter	0	0	0	0	0	0	0	0	0	0	0	0	0	0	0	0	0	0	0	0	0	0	0	0	0	0	0	0	0	0	0	0	0	0	0	0	0	0	0	0	0	0	0	0	0	0	0	0	0
k__Bacteria|p__Actinobacteria|c__Thermoleophilia|o__Solirubrobacterales|f__Patulibacteraceae|g__Patulibacter|s__Patulibacter_medicamentivorans	0	0	0	0	0	0	0	0	0	0	0	0	0	0	0	0	0	0	0	0	0	0	0	0	0	0	0	0	0	0	0	0	0	0	0	0	0	0	0	0	0	0	0	0	0	0	0	0	0
k__Bacteria|p__Actinobacteria|c__Thermoleophilia|o__Thermoleophilales	0	0	0	0	0	0	0	0	0	0	0	0	0	0	0	0	0	0	0	0	0	0	0	0	0	0	0	0	0	0	0	0	0	0	0	0	0	0	0	0	0	0.00363	0.00422	0.00691	0.00516	0.01502	0	0.00187	0
k__Bacteria|p__Actinobacteria|c__Thermoleophilia|o__Thermoleophilales|f__Thermoleophilaceae	0	0	0	0	0	0	0	0	0	0	0	0	0	0	0	0	0	0	0	0	0	0	0	0	0	0	0	0	0	0	0	0	0	0	0	0	0	0	0	0	0	0.00363	0.00422	0.00691	0.00516	0.01502	0	0.00187	0
k__Bacteria|p__Actinobacteria|c__Thermoleophilia|o__Thermoleophilales|f__Thermoleophilaceae|g__Thermoleophilum	0	0	0	0	0	0	0	0	0	0	0	0	0	0	0	0	0	0	0	0	0	0	0	0	0	0	0	0	0	0	0	0	0	0	0	0	0	0	0	0	0	0.00363	0.00422	0.00691	0.00516	0.01502	0	0.00187	0
k__Bacteria|p__Actinobacteria|c__Thermoleophilia|o__Thermoleophilales|f__Thermoleophilaceae|g__Thermoleophilum|s__Thermoleophilum_album	0	0	0	0	0	0	0	0	0	0	0	0	0	0	0	0	0	0	0	0	0	0	0	0	0	0	0	0	0	0	0	0	0	0	0	0	0	0	0	0	0	0.00363	0.00422	0.00691	0.00516	0.01502	0	0.00187	0
k__Bacteria|p__Bacteroidetes	6.71774	18.9993	18.7494	37.2351	43.3061	34.2076	27.3055	26.2037	19.7439	19.6567	25.3249	20.452	36.5781	29.1138	13.499	22.7634	34.3683	22.5275	26.9668	20.3009	31.8298	3.05668	10.3092	6.67465	15.9597	13.5984	56.2312	37.5603	41.8877	34.0433	28.5608	35.7156	39.6115	26.5598	18.3303	30.8223	12.6746	32.2516	21.4308	20.5759	15.3629	32.1458	46.7131	17.1248	20.4108	11.2102	32.1193	26.7989	28.3509
k__Bacteria|p__Bacteroidetes|c__Bacteroidetes_unclassified	0	1.1942	3.42102	0	1.11747	0	1.34118	0	1.65948	4.97637	5.36987	2.71709	6.47779	5.78679	0.56713	1.05964	8.57165	0.10944	0.2464	0.45148	4.31819	0	0.26468	0.00987	2.23126	2.83384	1.33745	0.14662	0.67052	0.0326	2.19507	0.28814	0.47811	0.17371	4.33569	7.55324	2.21662	2.77087	0	1.52788	2.19403	5.1606	1.2789	1.50045	3.15636	0.95435	2.86489	0.10143	0.20456
k__Bacteria|p__Bacteroidetes|c__Bacteroidetes_unclassified|o__Bacteroidetes_unclassified	0	1.1942	3.42102	0	1.11747	0	1.34118	0	1.65948	4.97637	5.36987	2.71709	6.47779	5.78679	0.56713	1.05964	8.57165	0.10944	0.2464	0.45148	4.31819	0	0.26468	0.00987	2.23126	2.83384	1.33745	0.14662	0.67052	0.0326	2.19507	0.28814	0.47811	0.17371	4.33569	7.55324	2.21662	2.77087	0	1.52788	2.19403	5.1606	1.2789	1.50045	3.15636	0.95435	2.86489	0.10143	0.20456
k__Bacteria|p__Bacteroidetes|c__Bacteroidetes_unclassified|o__Bacteroidetes_unclassified|f__Bacteroidetes_unclassified	0	1.1942	3.42102	0	1.11747	0	1.34118	0	1.65948	4.97637	5.36987	2.71709	6.47779	5.78679	0.56713	1.05964	8.57165	0.10944	0.2464	0.45148	4.31819	0	0.26468	0.00987	2.23126	2.83384	1.33745	0.14662	0.67052	0.0326	2.19507	0.28814	0.47811	0.17371	4.33569	7.55324	2.21662	2.77087	0	1.52788	2.19403	5.1606	1.2789	1.50045	3.15636	0.95435	2.86489	0.10143	0.20456
k__Bacteria|p__Bacteroidetes|c__Bacteroidetes_unclassified|o__Bacteroidetes_unclassified|f__Bacteroidetes_unclassified|g__Bacteroidetes_unclassified	0	1.1942	3.42102	0	1.11747	0	1.34118	0	1.65948	4.97637	5.36987	2.71709	6.47779	5.78679	0.56713	1.05964	8.57165	0.10944	0.2464	0.45148	4.31819	0	0.26468	0.00987	2.23126	2.83384	1.33745	0.14662	0.67052	0.0326	2.19507	0.28814	0.47811	0.17371	4.33569	7.55324	2.21662	2.77087	0	1.52788	2.19403	5.1606	1.2789	1.50045	3.15636	0.95435	2.86489	0.10143	0.20456
k__Bacteria|p__Bacteroidetes|c__Bacteroidetes_unclassified|o__Bacteroidetes_unclassified|f__Bacteroidetes_unclassified|g__Bacteroidetes_unclassified|s__Bacteroidetes_bacterium_oral_taxon_272	0	0.06298	1.69672	0	0.62225	0	0	0	0	0	0	0	0.05286	0.00756	0	0.24453	1.00541	0.07926	0.0971	0.04661	0.2381	0	0	0	0	0	0.57772	0.11748	0.60179	0	0	0.25707	0.27985	0.12891	0.10112	0.34093	0	0	0	0	0	0.49397	0.58974	0.01223	0	0.14087	0.31483	0.06351	0.04182
k__Bacteria|p__Bacteroidetes|c__Bacteroidetes_unclassified|o__Bacteroidetes_unclassified|f__Bacteroidetes_unclassified|g__Bacteroidetes_unclassified|s__Bacteroidetes_oral_taxon_274	0	1.13123	1.7243	0	0.49522	0	1.34118	0	1.65948	4.97637	5.36987	2.71709	6.42493	5.77923	0.56713	0.81511	7.56625	0.03018	0.1493	0.40487	4.0801	0	0.26468	0.00987	2.23126	2.83384	0.75974	0.02914	0.06873	0.0326	2.19507	0.03108	0.19826	0.0448	4.23456	7.21231	2.21662	2.77087	0	1.52788	2.19403	4.66663	0.68916	1.48822	3.15636	0.81348	2.55006	0.03791	0.16273
k__Bacteria|p__Bacteroidetes|c__Bacteroidia	3.08516	8.10734	13.2571	33.2211	41.9271	30.1299	25.9643	7.14773	7.25985	8.10364	13.6392	11.8306	21.151	14.9309	7.97807	7.48977	17.8423	19.8626	19.7329	10.9909	21.1126	3.05668	6.1001	4.13209	4.37414	9.97411	53.7728	36.4032	40.2528	33.4387	21.7402	34.7045	36.8885	25.2982	8.26545	17.8039	4.45729	23.6625	10.424	5.35762	8.16722	18.6915	44.0071	11.2528	11.3133	0.78871	14.6447	11.5451	16.8562
k__Bacteria|p__Bacteroidetes|c__Bacteroidia|o__Bacteroidales	3.08516	8.10734	13.2571	33.2211	41.9271	30.1299	25.9643	7.14773	7.25985	8.10364	13.6392	11.8306	21.151	14.9309	7.97807	7.48977	17.8423	19.8626	19.7329	10.9909	21.1126	3.05668	6.1001	4.13209	4.37414	9.97411	53.7728	36.4032	40.2528	33.4387	21.7402	34.7045	36.8885	25.2982	8.26545	17.8039	4.45729	23.6625	10.424	5.35762	8.16722	18.6915	44.0071	11.2528	11.3133	0.78871	14.6447	11.5451	16.8562
k__Bacteria|p__Bacteroidetes|c__Bacteroidia|o__Bacteroidales|f__Bacteroidaceae	0	0	0	0	0	0	0	0	0	0	0	0	0	0	0	0.01686	0.13648	0.08438	0.01429	0.07681	0.0261	0	0.00691	0	0	0	0.04915	0.42432	0.3981	0.11738	0	0	0.32291	0	0	0	0	0	0	0	0	0.06335	0.42947	0.00062	0.0085	0	0	0	0.051
k__Bacteria|p__Bacteroidetes|c__Bacteroidia|o__Bacteroidales|f__Bacteroidaceae|g__Bacteroides	0	0	0	0	0	0	0	0	0	0	0	0	0	0	0	0.01686	0.13648	0.08438	0.01429	0.07681	0.0261	0	0.00691	0	0	0	0.04915	0.42432	0.3981	0.11738	0	0	0.32291	0	0	0	0	0	0	0	0	0.06335	0.42947	0.00062	0.0085	0	0	0	0.051
k__Bacteria|p__Bacteroidetes|c__Bacteroidia|o__Bacteroidales|f__Bacteroidaceae|g__Bacteroides|s__Bacteroides_heparinolyticus	0	0	0	0	0	0	0	0	0	0	0	0	0	0	0	0.01686	0.13648	0.08438	0.01429	0.07681	0.0261	0	0	0	0	0	0.04915	0.42432	0.3981	0.11738	0	0	0	0	0	0	0	0	0	0	0	0.06335	0.42947	0.00062	0.0085	0	0	0	0.051
k__Bacteria|p__Bacteroidetes|c__Bacteroidia|o__Bacteroidales|f__Bacteroidaceae|g__Bacteroides|s__Bacteroides_zoogleoformans	0	0	0	0	0	0	0	0	0	0	0	0	0	0	0	0	0	0	0	0	0	0	0.00691	0	0	0	0	0	0	0	0	0	0.32291	0	0	0	0	0	0	0	0	0	0	0	0	0	0	0	0
k__Bacteria|p__Bacteroidetes|c__Bacteroidia|o__Bacteroidales|f__Porphyromonadaceae	0.05275	1.0683	2.60866	29.1999	23.3932	12.1051	9.99573	0.7155	1.25491	1.64026	2.36149	3.37163	2.99639	2.76872	1.95591	3.33072	9.35361	2.48251	3.56375	4.03611	6.14703	0	0.46616	0.06333	0.85145	5.6845	8.74953	29.5942	20.5485	25.78	14.7828	4.85747	9.27252	6.25853	2.60139	6.18695	0.99581	2.61919	1.55632	1.81227	1.01631	3.16253	20.4265	0.99767	2.27787	0.09271	7.49757	3.42739	6.39907
k__Bacteria|p__Bacteroidetes|c__Bacteroidia|o__Bacteroidales|f__Porphyromonadaceae|g__Porphyromonas	0.05275	1.0683	2.60866	29.1999	23.3932	12.1051	9.99573	0.7155	1.25491	1.64026	2.36149	3.37163	2.99639	2.76872	1.95591	3.33072	9.35361	2.48251	3.56375	4.03611	6.14703	0	0.46616	0.06333	0.85145	5.6845	8.74953	29.5942	20.5485	25.78	14.7828	4.85747	9.27252	6.25853	2.60139	6.18695	0.99581	2.61919	1.55632	1.81227	1.01631	3.16253	20.4265	0.99767	2.27787	0.09271	7.49757	3.42739	6.39907
k__Bacteria|p__Bacteroidetes|c__Bacteroidia|o__Bacteroidales|f__Porphyromonadaceae|g__Porphyromonas|s__Porphyromonas_asaccharolytica	0	0	0	0	0	0	0	0	0	0	0	0	0	0	0	0	0	0.00125	0.00263	0	0	0	0	0	0	0	0	0	0.00585	0	0	0	0	0	0	0	0	0	0	0	0	0	0	0	0	0	0	0	0
k__Bacteria|p__Bacteroidetes|c__Bacteroidia|o__Bacteroidales|f__Porphyromonadaceae|g__Porphyromonas|s__Porphyromonas_canoris	0	0	0	0	0	0	0	0	0.04443	0	0	0	0	0	0	0	0	0	0	0	0	0	0	0	0	0	0	0	0	0	0	0	0	0	0	0	0	0	0	0	0	0	0	0	0.00492	0.00495	0	0	0
k__Bacteria|p__Bacteroidetes|c__Bacteroidia|o__Bacteroidales|f__Porphyromonadaceae|g__Porphyromonas|s__Porphyromonas_catoniae	0	0.15334	0.09662	0	0.00091	0.54262	0	0	1.02443	1.22011	0	0	0.3242	0.22965	0.0508	0.24437	0.12939	0.03736	0.23079	0.18826	1.21911	0	0.01128	0	0.03548	0	0.04014	0	0.05767	0	3.63083	0	0	0	0.09162	0.09467	0.43122	0.57301	0.68172	0.4219	0.9234	0.03711	0.05172	0.02515	0.02347	0.01458	0	0.01793	0.17606
k__Bacteria|p__Bacteroidetes|c__Bacteroidia|o__Bacteroidales|f__Porphyromonadaceae|g__Porphyromonas|s__Porphyromonas_endodontalis	0	0.18355	2.49872	7.56541	4.5962	11.5625	9.99573	0.7155	0	0	1.5147	0.32024	2.11173	1.14639	0.17998	0.23912	1.71277	0.85837	0.91531	1.25886	0.3303	0	0.25024	0.01313	0.3015	0	3.29736	4.78625	15.0037	0.96909	0.01983	2.85468	3.68973	1.52779	0.33893	0.88825	0	0.62021	0.39652	1.02328	0.09291	1.23561	2.99441	0.34169	1.52807	0.03119	1.14807	0.05485	0.86145
k__Bacteria|p__Bacteroidetes|c__Bacteroidia|o__Bacteroidales|f__Porphyromonadaceae|g__Porphyromonas|s__Porphyromonas_gingivalis	0.05275	0.58129	0	21.6345	18.7923	0	0	0	0	0	0.73325	2.36167	0	0	0	0.83278	7.39096	1.41108	0.35808	1.804	3.77676	0	0.14911	0.01308	0	5.6845	5.3254	24.783	5.38611	24.811	11.1322	2.00279	5.58279	4.73074	1.45242	4.36473	0	0.12845	0	0	0	1.48526	17.1495	0.25647	0.4367	0.04101	6.34949	0.18867	0.68813
k__Bacteria|p__Bacteroidetes|c__Bacteroidia|o__Bacteroidales|f__Porphyromonadaceae|g__Porphyromonas|s__Porphyromonas_gingivicanis	0	0	0	0	0	0	0	0	0	0	0	0	0	0	0	0	0	0	0	0	0	0	0	0	0	0	0	0	0	0	0	0	0	0	0	0	0	0	0	0	0	0	0.00076	0	0	0	0	0	0.00026
k__Bacteria|p__Bacteroidetes|c__Bacteroidia|o__Bacteroidales|f__Porphyromonadaceae|g__Porphyromonas|s__Porphyromonas_somerae	0	0.05478	0.01332	0	0	0	0	0	0.09019	0.03516	0	0	0.19513	0.32243	0.12103	0.10981	0.0245	0.00469	0.05447	0.13277	0.81165	0	0.05553	0.03712	0.04101	0	0.02029	0	0	0	0	0	0	0	0.69683	0.57503	0.25571	0.43989	0.47807	0.36708	0	0.01159	0.00033	0.04101	0.0469	0.00098	0	0.05167	0.08824
k__Bacteria|p__Bacteroidetes|c__Bacteroidia|o__Bacteroidales|f__Porphyromonadaceae|g__Porphyromonas|s__Porphyromonas_sp_oral_taxon_278	0	0.09534	0	0	0	0	0	0	0.09586	0.38498	0.11354	0.68972	0.36533	1.07026	1.6041	1.90463	0.096	0.16789	1.99948	0.65221	0.00921	0	0	0	0.47346	0	0.06634	0.02304	0.08312	0	0	0	0	0	0.02158	0.26427	0.30888	0.85763	0	0	0	0.39295	0.22976	0.33335	0.2378	0	0	3.11427	4.58493
k__Bacteria|p__Bacteroidetes|c__Bacteroidia|o__Bacteroidales|f__Porphyromonadaceae|g__Porphyromonas|s__Porphyromonas_uenonis	0	0	0	0	0.00379	0	0	0	0	0	0	0	0	0	0	0	0	0.00186	0.00298	0	0	0	0	0	0	0	0	0.00196	0.01207	0	0	0	0	0	0	0	0	0	0	0	0	0	0	0	0	0	0	0	0
k__Bacteria|p__Bacteroidetes|c__Bacteroidia|o__Bacteroidales|f__Prevotellaceae	2.23234	4.53741	7.2549	0.76535	16.9709	13.086	11.352	2.66495	1.46683	3.16634	6.54954	4.53684	11.6168	7.92117	3.00112	3.58945	3.54534	16.2926	13.4545	4.22815	10.3979	1.85469	5.41078	3.95245	1.41696	0.87773	44.5927	3.13058	18.1792	0	2.76112	29.6044	24.4511	16.9508	3.66443	8.26438	1.80535	17.7172	5.93928	2.42274	6.40136	10.7251	11.9656	5.43719	6.10204	0.58619	4.68001	8.03607	10.139
k__Bacteria|p__Bacteroidetes|c__Bacteroidia|o__Bacteroidales|f__Prevotellaceae|g__Alloprevotella	0.30454	0.1855	3.28436	0	2.29859	3.2131	5.24374	0	0.05721	0.00369	0.27298	0.28424	2.26501	1.45726	0.67734	0.53902	0.45547	0.73746	0.54485	1.40436	1.77856	0	0.70356	0.38789	0.12165	0	3.91365	0.41119	3.29615	0	0.50789	5.30675	10.9363	2.05836	0.11041	0.55777	0.18781	13.4257	0.05461	0.07882	0.14826	2.76201	1.25454	0.2185	1.14616	0.01052	0.13725	0.20649	0.87264
k__Bacteria|p__Bacteroidetes|c__Bacteroidia|o__Bacteroidales|f__Prevotellaceae|g__Alloprevotella|s__Alloprevotella_rava	0	0.00264	0	0	0.21396	0	0	0	0	0	0.00445	0.02682	0.00438	0	0	0	0.00451	0.14563	0.09844	0	0.03956	0	0.00716	0.00037	0	0	0.14001	0.01833	0.08557	0	0	0.07564	0.05543	0	0	0.00092	0	0	0	0	0	0	0	0.00251	0.00798	0	0.06799	0.00158	0
k__Bacteria|p__Bacteroidetes|c__Bacteroidia|o__Bacteroidales|f__Prevotellaceae|g__Alloprevotella|s__Alloprevotella_tannerae	0.30454	0.18046	3.24319	0	2.08462	0.49953	5.24374	0	0.05721	0.00369	0.2465	0.23863	1.77046	1.33199	0.67734	0.2863	0.36216	0.52475	0.29581	0.74204	1.55402	0	0.67545	0.38752	0.06468	0	3.55867	0.39237	3.20193	0	0.50789	5.23111	10.6867	1.89405	0.08884	0.49808	0.18677	12.3008	0.05461	0.07882	0.14826	2.73925	1.17268	0.21599	1.13818	0.01052	0.06614	0.11784	0.68497
k__Bacteria|p__Bacteroidetes|c__Bacteroidia|o__Bacteroidales|f__Prevotellaceae|g__Alloprevotella|s__Prevotella_sp_oral_taxon_473	0	0.00239	0.04117	0	0	2.71358	0	0	0	0	0.02203	0.01878	0.49018	0.12527	0	0.25272	0.08879	0.06708	0.15059	0.66233	0.18499	0	0.02095	0	0.05697	0	0.21497	0.0005	0.00864	0	0	0	0.19414	0.16431	0.02157	0.05876	0.00104	1.12487	0	0	0	0.02276	0.08186	0	0	0	0.00312	0.08706	0.18766
k__Bacteria|p__Bacteroidetes|c__Bacteroidia|o__Bacteroidales|f__Prevotellaceae|g__Prevotella	1.9278	4.35191	3.97054	0.76535	14.6723	9.8729	6.10821	2.66495	1.40962	3.16265	6.27656	4.25261	9.35184	6.46391	2.32378	3.05042	3.08987	15.5552	12.9097	2.82379	8.61937	1.85469	4.70722	3.56456	1.29531	0.87773	40.679	2.71938	14.883	0	2.25323	24.2976	13.5148	14.8925	3.55402	7.70661	1.61754	4.29152	5.88467	2.34392	6.2531	7.9631	10.711	5.21869	4.95588	0.57567	4.54277	7.82958	9.26633
k__Bacteria|p__Bacteroidetes|c__Bacteroidia|o__Bacteroidales|f__Prevotellaceae|g__Prevotella|s__Prevotella_baroniae	0	0.10865	0.19342	0	4.87525	0	0.56407	0	0	0	0.14631	0.0286	0.09565	0.00741	0	0.09914	0.31588	0.0696	0.22774	0.09405	0.44498	0	0.04519	0.00989	0	0	0.65114	0.17987	2.34191	0	0	0	1.50026	0.26579	0	0.00277	0	0.06329	0	0	0	0.12599	0.58034	0.00451	0	0	0.11249	0.07146	0.24671
k__Bacteria|p__Bacteroidetes|c__Bacteroidia|o__Bacteroidales|f__Prevotellaceae|g__Prevotella|s__Prevotella_buccae	0.66193	0.10358	0.04933	0	2.83905	0.05793	0.21149	0	0	0	0	0.00482	0.1279	0.0331	0	0.25894	0.27678	0.77651	1.94259	0.20454	0.06668	0	0.0184	0.01394	0	0	1.62962	0.19123	1.49156	0	0	0.14317	0.60237	0.32593	0.01605	0.16995	0	0.0061	0	0.15177	0	0.08092	0.08802	0.00046	0	0	0.05706	0.04164	0.0508
k__Bacteria|p__Bacteroidetes|c__Bacteroidia|o__Bacteroidales|f__Prevotellaceae|g__Prevotella|s__Prevotella_dentalis	0	0.03907	0.00606	0	0.15805	0	0.11112	0	0	0	0	0	0	0	0	0.02827	0.07253	0.09557	0.06718	0	0.15007	0	0.00144	0	0	0	0.18582	0.03367	0.29178	0	0	0	0.17657	0	0.01566	0.07343	0	0.00258	0	0	0	0.01399	0.16855	0	0	0.00303	0.46037	0.00029	0.00035
k__Bacteria|p__Bacteroidetes|c__Bacteroidia|o__Bacteroidales|f__Prevotellaceae|g__Prevotella|s__Prevotella_denticola	0.26164	0.01494	0	0	0.32224	0.08297	0	0	0	0	0.20859	0.05153	0.90282	0.43494	0	0.24415	0.00323	7.52355	2.48099	0.04172	0.3082	0	3.78971	2.50444	0	0	7.16799	0.61329	2.86393	0	0	0	4.23057	8.00786	0	0.01456	0	0.03583	0	0.02325	0.11171	0.00598	0.05427	0.00873	0.10169	0.00316	0.05574	0.02161	0.00628
k__Bacteria|p__Bacteroidetes|c__Bacteroidia|o__Bacteroidales|f__Prevotellaceae|g__Prevotella|s__Prevotella_disiens	0	0	0	0	0	0	0	0	0	0	0	0	0	0	0	0	0	0.02569	0	0	0	0	0	0	0	0	0	0.06282	0.09426	0	0	0	0	0	0	0	0	0	0	0	0	0	0	0	0	0	0	0	0
k__Bacteria|p__Bacteroidetes|c__Bacteroidia|o__Bacteroidales|f__Prevotellaceae|g__Prevotella|s__Prevotella_enoeca	0	0	0	0	0.13155	0	0	0	0	0	0	0	0.01184	0	0	0.00162	0	0.00309	0	0.00244	0.11016	0	0	0	0	0	0.04519	0	0.01091	0	0	0	0	0	0	0	0	0	0	0	0	0	0.02677	0	0	0	0	0.01654	0
k__Bacteria|p__Bacteroidetes|c__Bacteroidia|o__Bacteroidales|f__Prevotellaceae|g__Prevotella|s__Prevotella_fusca	0	0	0	0	0	0	0	0	0	0	0	0	0	0	0	0	0	0	0.00085	0	0	0	0.01321	0	0	0	0.00154	0	0	0	0	0	0.12393	0	0	0	0	0	0	0	0	0	0	0.0014	0.00236	0	0	0.00999	0.12084
k__Bacteria|p__Bacteroidetes|c__Bacteroidia|o__Bacteroidales|f__Prevotellaceae|g__Prevotella|s__Prevotella_histicola	0	0	0	0	0	0	0	0	0	0	0	0	0	0	0	0	0	0	0.00517	0	0.0712	0	0	0	0	0	0.00453	0	0	0	0	0	0	0	0	0	0	0	0	0	0	0	0	0	0	0	0	0.01559	0.00101
k__Bacteria|p__Bacteroidetes|c__Bacteroidia|o__Bacteroidales|f__Prevotellaceae|g__Prevotella|s__Prevotella_intermedia	0.16248	1.33345	0	0.76535	3.74875	0	2.11927	2.66495	0	0	0.59586	0.15403	0	0	0.89515	0.25468	1.22962	0.24994	0.35005	1.05904	1.48252	0	0.00194	0.00161	0.49628	0	2.83244	0.40439	2.16647	0	1.6673	0	0.09008	0.36637	0.18506	2.13063	0.42706	0.15127	0	1.2131	0	0.20305	1.6625	1.07508	1.80078	0.04128	3.15772	0.26407	4.71132
k__Bacteria|p__Bacteroidetes|c__Bacteroidia|o__Bacteroidales|f__Prevotellaceae|g__Prevotella|s__Prevotella_jejuni	0	0	0	0	0	0	0	0	0	0	0	0	0	0	0	0.00167	0	0.00352	0.03061	0	0.00623	0	0	0	0	0	0.00724	0	0	0	0	0	0	0	0	0	0	0	0	0	0	0	0	0.00128	0	0	0	0.00681	0
k__Bacteria|p__Bacteroidetes|c__Bacteroidia|o__Bacteroidales|f__Prevotellaceae|g__Prevotella|s__Prevotella_loescheii	0	0.46673	0.46703	0	0	0.26688	0	0	0	0.25477	0	0	0	0	0.05526	0.38666	0.46499	0.02273	0.0918	0	0.52884	0	0.00249	0	0.22584	0	0.02503	0.00313	0.0142	0	0	0	0.01693	0.02928	2.74136	3.54397	0.07718	0.44854	0.00282	0.02766	0.09722	0.19851	0.01518	0.27374	0.73951	0.43097	0.33896	1.49979	1.06289
k__Bacteria|p__Bacteroidetes|c__Bacteroidia|o__Bacteroidales|f__Prevotellaceae|g__Prevotella|s__Prevotella_maculosa	0	0.19182	0.12627	0	0.19549	0	0	0	0.15391	0.2307	0.43925	0.34025	0.30233	0.3056	0.22401	0.06998	0.08172	0.25587	0.32331	0.11634	0.34725	0	0.03478	0.0479	0.0591	0	0.07836	0.05379	0.07274	0	0	0.09591	0.30116	0.15041	0.07957	0.21284	0.06802	0.22758	1.4927	0.05598	0.25897	0.13197	0.03041	0.22973	0.20588	0.00783	0.07125	0.31704	0.10806
k__Bacteria|p__Bacteroidetes|c__Bacteroidia|o__Bacteroidales|f__Prevotellaceae|g__Prevotella|s__Prevotella_marshii	0	0.15617	1.04558	0	0.26717	0.43818	0	0	0.03219	0.04745	0.161	0.07313	0.41843	0.45814	0.05472	0.04066	0.0036	0.07449	0.10597	0.03118	0.26633	0	0	0	0	0	0.1634	0.01675	0.16405	0	0	0.36862	0	0	0	0.05195	0	0.07862	0	0.12366	0.02555	0.29536	0.26301	0.16915	0.09232	0	0	0.32683	0.56032
k__Bacteria|p__Bacteroidetes|c__Bacteroidia|o__Bacteroidales|f__Prevotellaceae|g__Prevotella|s__Prevotella_melaninogenica	0.25108	0.04736	0.04176	0	0	0	0.9943	0	0	0.28015	0.6139	0.47672	0.06051	0.04622	0.19048	0.09649	0.0086	1.23761	1.25001	0.06048	0.28161	0	0.08301	0.01872	0.03036	0	0.31229	0.14177	0.29683	0	0	4.06399	0.18106	0.07233	0	0.01456	0.01838	0.00749	0.9728	0.35747	0.5099	0.09214	0.31414	0.34108	0.03348	0	0	1.45797	0.36333
k__Bacteria|p__Bacteroidetes|c__Bacteroidia|o__Bacteroidales|f__Prevotellaceae|g__Prevotella|s__Prevotella_micans	0	0.55296	0.3683	0	0.09739	0.24705	0.15707	0	0.12253	0.52928	0.79295	0.99743	1.86474	2.9113	0.19662	0.21429	0.05065	0.01081	0.01361	0.01137	0.64611	0	0	0	0.11501	0	0.13917	0.00111	0.01811	0	0.1277	0.01509	0.01711	0	0.02727	0.0382	0.27199	0.57151	0	0.02824	0.51596	2.91211	0.56583	0.83403	0.54426	0.00052	0	0.08064	0.09131
k__Bacteria|p__Bacteroidetes|c__Bacteroidia|o__Bacteroidales|f__Prevotellaceae|g__Prevotella|s__Prevotella_multiformis	0	0	0	0	0.53092	0	0	0	0	0	0	0	0	0	0	0.62246	0.01232	0	0	0.09279	0	1.85469	0.03411	0.03955	0	0.87773	22.5673	0	0	0	0	0	0.89826	1.23628	0	0.03128	0	0	0	0.02075	0	0.00919	0.12123	0.01873	0.04623	0	0.11053	0.07992	0.03333
k__Bacteria|p__Bacteroidetes|c__Bacteroidia|o__Bacteroidales|f__Prevotellaceae|g__Prevotella|s__Prevotella_multisaccharivorax	0	0	0	0	0	0	0	0	0	0	0	0	0	0	0	0	0	0.03303	0.00543	0	0	0	0	0.07151	0	0	0	0.00411	0	0	0	0	0	0.06138	0	0	0	0	0	0	0	0	0	0	0	0	0	0	0
k__Bacteria|p__Bacteroidetes|c__Bacteroidia|o__Bacteroidales|f__Prevotellaceae|g__Prevotella|s__Prevotella_nigrescens	0.57007	0.00287	0.31038	0	0.02204	0.85358	0	0	0.05748	0.23943	0.09394	0.02658	0.23568	0.12453	0.02957	0.14979	0.04344	0.18015	0.10603	0.40008	0.09846	0	0.10384	0.07551	0.01585	0	2.24436	0.00598	0.19565	0	0	2.49273	0.62438	1.03463	0	0.00993	0.03364	0.09441	0.01315	0.0272	0	2.66744	5.08487	0.84835	0.28869	0.01152	0.05199	0.45712	0.10445
k__Bacteria|p__Bacteroidetes|c__Bacteroidia|o__Bacteroidales|f__Prevotellaceae|g__Prevotella|s__Prevotella_oralis	0	0.02454	0	0	0.06496	0	0	0	0	0	0.36939	0.31739	0	0	0	0.00237	0.0012	0.1741	0.21447	0.00675	0.05051	0	0	0	0	0	0.00181	0.08215	0.20729	0	0	0	0	0	0	0	0	0	0	0	0	0.06027	0.05163	0	0.00025	0	0	0.00487	0.01473
k__Bacteria|p__Bacteroidetes|c__Bacteroidia|o__Bacteroidales|f__Prevotellaceae|g__Prevotella|s__Prevotella_oris	0	0.02618	0.14376	0	1.02909	0	1.95089	0	0.00342	0.22421	1.27828	0.39832	1.25708	0.55709	0.09061	0.18574	0.02947	0.47101	0.40951	0.27266	1.71193	0	0.30163	0.20154	0.02066	0	1.82441	0.18861	1.31785	0	0.24282	10.3281	4.34108	2.32058	0.1163	0.43428	0.03777	0.9925	0.02837	0.10435	1.17502	0.07103	0.23428	0.31363	0.14483	0.01648	0.10575	0.19373	0.38762
k__Bacteria|p__Bacteroidetes|c__Bacteroidia|o__Bacteroidales|f__Prevotellaceae|g__Prevotella|s__Prevotella_oulorum	0	0.30354	0.19118	0	0.08809	0	0	0	0.265	0.41558	0.59816	0.74331	0.25728	0.13989	0.1576	0.00186	0	1.41193	1.1069	0.02498	0.65837	0	0.14438	0.31167	0.03126	0	0	0.14498	0.22455	0	0	3.41223	0.2834	0.57953	0	0.02416	0.0722	0.58617	1.7831	0.0714	1.38232	0.06045	0.03215	0.08196	0.02653	0	0	0.37002	0.17179
k__Bacteria|p__Bacteroidetes|c__Bacteroidia|o__Bacteroidales|f__Prevotellaceae|g__Prevotella|s__Prevotella_pallens	0	0	0	0	0	0	0	0	0	0.01502	0.00196	0	0	0.03152	0	0.09638	0.00097	1.20174	1.13907	0	0.08614	0	0.0337	0.02271	0	0	0.36724	0.13964	0.33287	0	0	0	0.06502	0.03593	0	0	0.03628	0.27848	0.74763	0	0	0	0	0.00099	0.00218	0	0	1.17726	0.49646
k__Bacteria|p__Bacteroidetes|c__Bacteroidia|o__Bacteroidales|f__Prevotellaceae|g__Prevotella|s__Prevotella_pleuritidis	0	0	0.72377	0	0	7.82	0	0	0	0	0.12356	0.00799	3.3896	1.09679	0.10676	0	0.28426	0	0.08532	0.0123	0	0	0	0	0.11482	0	0	0.00266	1.24479	0	0	0.57192	0	0	0	0	0	0	0	0	1.83878	0	0.26213	0	0	0	0	0	0
k__Bacteria|p__Bacteroidetes|c__Bacteroidia|o__Bacteroidales|f__Prevotellaceae|g__Prevotella|s__Prevotella_saccharolytica	0	0.97491	0.09405	0	0.14369	0.10631	0	0	0.77509	0.91773	0.79224	0.4175	0.3118	0.25096	0.31932	0.21588	0.19921	0.06978	0.27427	0.19251	0.8623	0	0	0.02853	0.18613	0	0.03952	0.04201	0.04355	0	0.2154	0.03291	0.02083	0.01344	0.37276	0.91286	0.57502	0.74715	0.84167	0.13374	0.07746	0.80299	0.18592	0.65529	0.65431	0.05987	0.02091	0.98772	0.6252
k__Bacteria|p__Bacteroidetes|c__Bacteroidia|o__Bacteroidales|f__Prevotellaceae|g__Prevotella|s__Prevotella_salivae	0	0	0	0	0.00937	0	0	0	0	0	0.00998	0.09351	0	0	0	0.05669	0	0.47932	0.3318	0.09072	0.03135	0	0.04949	0.20402	0	0	0.23544	0.0283	0.01235	0	0	0.63491	0.00634	0.39274	0	0	0	0	0	0	0	0.10641	0.00273	0	0	0	0	0.10528	0.02345
k__Bacteria|p__Bacteroidetes|c__Bacteroidia|o__Bacteroidales|f__Prevotellaceae|g__Prevotella|s__Prevotella_scopos	0	0	0	0	0	0	0	0	0	0	0	0	0.00129	0	0.00247	0.00285	0	0.01104	0.03138	0	0	0	0	0	0	0	0.02591	0	0.01107	0	0	0	0	0	0	0	0	0	0	0	0	0	0	0.00708	0.0091	0	0	0.03038	0.03828
k__Bacteria|p__Bacteroidetes|c__Bacteroidia|o__Bacteroidales|f__Prevotellaceae|g__Prevotella|s__Prevotella_shahii	0	0.00058	0	0	0	0	0	0	0	0	0	0	0	0	0	0.00023	0.0002	0.00022	0.00427	0	0.01802	0	0.00036	0.00039	0	0	0	0	0	0	0	0	0.00357	0	0	0	0	0	0	0	0	0.01417	0	0.01102	0.03071	0.00101	0	0.01847	0.01341
k__Bacteria|p__Bacteroidetes|c__Bacteroidia|o__Bacteroidales|f__Prevotellaceae|g__Prevotella|s__Prevotella_sp_F0091	0	0	0.00888	0	0	0	0	0	0	0	0	0	0.0075	0	0.00121	0.00854	0	0.30406	2.01296	0.01827	0.06838	0	0.00178	0.0022	0	0	0.06084	0.03043	0.30426	0	0	0	0.02593	0	0	0.04125	0	0	0	0	0	0.08981	0.95453	0.02644	0.05034	0	0	0.0579	0.01348
k__Bacteria|p__Bacteroidetes|c__Bacteroidia|o__Bacteroidales|f__Prevotellaceae|g__Prevotella|s__Prevotella_sp_oral_taxon_299	0	0	0	0	0	0	0	0	0	0	0	0	0	0	0	0.0039	0	0	0.00051	0	0.01644	0	0	0	0	0	0	0	0	0	0	0	0	0	0	0	0	0	0	0	0.26021	0	0	0.00264	0	0	0	0.00392	0.00067
k__Bacteria|p__Bacteroidetes|c__Bacteroidia|o__Bacteroidales|f__Prevotellaceae|g__Prevotella|s__Prevotella_sp_oral_taxon_306	0	0	0.03101	0	0	0	0	0	0	0	0.01869	0.09086	0.02925	0.0171	0	0	0	0.37356	0.09403	0.04085	0.23872	0	0.00714	0.00426	0	0	0.00569	0.01483	0.01785	0	0	0.46373	0	0	0	0	0	0	0	0	0	0	0	0.17984	0.12113	0	0	0.13806	0.00655
k__Bacteria|p__Bacteroidetes|c__Bacteroidia|o__Bacteroidales|f__Prevotellaceae|g__Prevotella|s__Prevotella_sp_oral_taxon_376	0	0	0.07246	0	0.05777	0	0	0	0	0	0	0	0	0	0	0.00534	0.00571	0.11782	0.10471	0	0	0	0	0	0	0	0.04316	0.31125	1.08651	0	0	0	0	0	0	0	0	0	0	0	0	0.01538	0.00914	0	0.00133	0	0	0	0
k__Bacteria|p__Bacteroidetes|c__Bacteroidia|o__Bacteroidales|f__Prevotellaceae|g__Prevotella|s__Prevotella_sp_oral_taxon_820	0	0.00193	0	0	0.08801	0	0	0	0	0	0	0	0	0	0	0.0011	0.00548	0.00353	0.00235	0	0	0	0	0	0	0	0.0044	0.00297	0.02509	0	0	0	0	0	0	0	0	0	0	0	0	0.00118	0.00339	0	0	0	0	0.00073	0.01015
k__Bacteria|p__Bacteroidetes|c__Bacteroidia|o__Bacteroidales|f__Prevotellaceae|g__Prevotella|s__Prevotella_veroralis	0.02061	0.00264	0.09732	0	0.00346	0	0	0	0	0.00834	0.03249	0.03062	0.07814	0.04932	0	0.00075	0	0.37491	0.09678	0.05071	0.06856	0	0.04064	0.00616	0	0	0.01523	0.01961	0.03259	0	0	1.6743	0.00594	0	0	0	0	0	0.00242	0.00535	0	0.00475	0	0.13353	0.05998	0	0	0.07394	0.00354
k__Bacteria|p__Bacteroidetes|c__Bacteroidia|o__Bacteroidales|f__Tannerellaceae	0.80007	2.50163	3.39356	3.25587	1.56294	4.93881	4.61667	3.76728	4.53811	3.29704	4.72815	3.92215	6.53772	4.24103	3.02103	0.55274	4.80682	1.00307	2.70037	2.64978	4.5415	1.20199	0.21626	0.11631	2.10574	3.41187	0.38142	3.25406	1.12706	7.54123	4.19631	0.24264	2.84199	2.08886	1.99962	3.35258	1.65613	3.32618	2.9284	1.12261	0.74955	4.74056	11.1856	4.81735	2.92493	0.10981	2.4671	0.08163	0.26721
k__Bacteria|p__Bacteroidetes|c__Bacteroidia|o__Bacteroidales|f__Tannerellaceae|g__Tannerella	0.80007	2.50163	3.39356	3.25587	1.56294	4.93881	4.61667	3.76728	4.53811	3.29704	4.72815	3.92215	6.53772	4.24103	3.02103	0.55274	4.80682	1.00307	2.70037	2.64978	4.5415	1.20199	0.21626	0.11631	2.10574	3.41187	0.38142	3.25406	1.12706	7.54123	4.19631	0.24264	2.84199	2.08886	1.99962	3.35258	1.65613	3.32618	2.9284	1.12261	0.74955	4.74056	11.1856	4.81735	2.92493	0.10981	2.4671	0.08163	0.26721
k__Bacteria|p__Bacteroidetes|c__Bacteroidia|o__Bacteroidales|f__Tannerellaceae|g__Tannerella|s__Tannerella_forsythia	0	0.04737	2.36252	3.25587	1.49797	4.48878	4.61667	3.76728	0.00377	0.65354	0.53936	0.639	3.45647	0.80077	0.00176	0.24658	4.22907	0.06844	0.08147	1.18432	0.68987	0.51193	0.02604	0.00434	0.18859	1.49991	0.2428	3.09865	0.8459	7.54123	3.29589	0.13171	2.17643	1.94385	0.66596	1.28957	0	1.3696	0	0.20939	0.30277	0.8709	10.6434	0.47401	1.07648	0.09343	2.45168	0.0615	0.26129
k__Bacteria|p__Bacteroidetes|c__Bacteroidia|o__Bacteroidales|f__Tannerellaceae|g__Tannerella|s__Tannerella_sp_oral_taxon_808	0	0.00121	0.18009	0	0	0	0	0	0.03523	0.02885	0.32492	0.19493	0.36231	0.23962	0.0471	0.03914	0.10253	0.16658	0.01891	0.4276	1.07032	0	0.01405	0.00415	0.04055	0	0.0619	0.03703	0.072	0	0	0.11093	0.32819	0.0737	0.04667	0.09386	0.03465	0.02436	0	0.05076	0.00855	0.11979	0.15041	0.04622	0.04914	0	0	0.00689	0
k__Bacteria|p__Bacteroidetes|c__Bacteroidia|o__Bacteroidales|f__Tannerellaceae|g__Tannerella|s__Tannerella_sp_oral_taxon_HOT_286	0.80007	2.45305	0.85095	0	0.06497	0.45003	0	0	4.49911	2.61465	3.86387	3.08823	2.71893	3.20064	2.97217	0.26703	0.47522	0.76804	2.59999	1.03785	2.78132	0.69006	0.17616	0.10782	1.8766	1.91197	0.07672	0.11838	0.20916	0	0.90043	0	0.33737	0.07131	1.287	1.96915	1.62148	1.93222	2.9284	0.86246	0.43823	3.74988	0.39177	4.29712	1.79932	0.01638	0.01542	0.01324	0.00592
k__Bacteria|p__Bacteroidetes|c__Flavobacteriia	3.63258	9.6978	2.07126	4.01395	0.2615	4.07768	0	19.056	10.8245	6.57671	6.31581	5.90428	8.94936	8.39606	4.95382	14.2141	7.95435	2.55548	6.98749	8.85859	6.39908	0	3.94444	2.53269	9.35428	0.79044	1.12097	1.01053	0.96438	0.57199	4.62545	0.72301	2.24493	1.08783	5.72915	5.46511	6.00071	5.81823	11.0068	13.6904	5.00165	8.29364	1.42708	4.37155	5.94107	9.46711	14.6098	15.1523	11.2901
k__Bacteria|p__Bacteroidetes|c__Flavobacteriia|o__Flavobacteriales	3.63258	9.6978	2.07126	4.01395	0.2615	4.07768	0	19.056	10.8245	6.57671	6.31581	5.90428	8.94936	8.39606	4.95382	14.2141	7.95435	2.55548	6.98749	8.85859	6.39908	0	3.94444	2.53269	9.35428	0.79044	1.12097	1.01053	0.96438	0.57199	4.62545	0.72301	2.24493	1.08783	5.72915	5.46511	6.00071	5.81823	11.0068	13.6904	5.00165	8.29364	1.42708	4.37155	5.94107	9.46711	14.6098	15.1523	11.2901
k__Bacteria|p__Bacteroidetes|c__Flavobacteriia|o__Flavobacteriales|f__Flavobacteriaceae	3.63258	9.6978	2.07126	4.01395	0.2615	4.07768	0	19.056	10.8245	6.57671	6.31581	5.90428	8.94936	8.39606	4.95382	14.2141	7.95435	2.55548	6.98749	8.85859	6.39908	0	3.94444	2.53269	9.35428	0.79044	1.12097	1.01053	0.96438	0.57199	4.62545	0.72301	2.24493	1.08783	5.72915	5.46511	6.00071	5.81823	11.0068	13.6904	5.00165	8.29364	1.42708	4.37155	5.94107	9.46711	14.6098	15.1523	11.2901
k__Bacteria|p__Bacteroidetes|c__Flavobacteriia|o__Flavobacteriales|f__Flavobacteriaceae|g__Capnocytophaga	3.63258	9.6978	2.07126	4.01395	0.2615	4.07768	0	19.056	10.8245	6.57671	6.31581	5.90428	8.94936	8.39606	4.95382	14.2141	7.95435	2.55548	6.98749	8.85859	6.39908	0	3.94444	2.53269	9.35428	0.79044	1.12097	1.01053	0.96438	0.57199	4.62545	0.72301	2.24493	1.08783	5.72915	5.46511	6.00071	5.81823	11.0068	13.6904	5.00165	8.29364	1.42708	4.37155	5.94107	9.46711	14.6098	15.1523	11.2901
k__Bacteria|p__Bacteroidetes|c__Flavobacteriia|o__Flavobacteriales|f__Flavobacteriaceae|g__Capnocytophaga|s__Capnocytophaga_gingivalis	1.47781	0.96415	0.32791	3.43506	0.12395	0.67423	0	7.36125	0.06459	0.09806	0.70109	1.0727	0.24333	0.98632	0.23226	2.99052	1.96361	0.72468	0.65904	1.27266	1.09391	0	0.96443	0.33081	0.45587	0	0.26434	0.34427	0.1567	0.12502	0.69303	0.52049	0.45468	0.22765	0.77876	0.37813	0.92534	0.42453	0.59303	4.90171	0.25523	2.01905	0.31389	0.39118	0.44196	3.05106	2.80206	1.36003	1.25216
k__Bacteria|p__Bacteroidetes|c__Flavobacteriia|o__Flavobacteriales|f__Flavobacteriaceae|g__Capnocytophaga|s__Capnocytophaga_granulosa	0.32134	2.29879	0.04515	0	0.01354	0	0	0	0.80948	0.80191	0.96091	0.29827	1.43827	1.57753	0.90772	5.69204	1.24845	0.29641	1.99317	1.51545	1.2957	0	0.2683	0.32951	1.64715	0	0.35649	0.08029	0.12194	0.10313	0.18086	0	0.11526	0.24827	0.19308	0.34496	1.41671	0.81087	0	0.65966	1.23256	2.56599	0.12985	1.10925	1.44235	0.03741	0.03676	6.80174	4.37552
k__Bacteria|p__Bacteroidetes|c__Flavobacteriia|o__Flavobacteriales|f__Flavobacteriaceae|g__Capnocytophaga|s__Capnocytophaga_haemolytica	0	0	0	0	0	0	0	0	0	0	0	0	0	0	0	0	0	0	0	0	0	0	0	0	0	0	0	0	0	0	0	0	0	0	0	0	0	0	0	0.11987	0	0	0	0	0	0	0	0	0
k__Bacteria|p__Bacteroidetes|c__Flavobacteriia|o__Flavobacteriales|f__Flavobacteriaceae|g__Capnocytophaga|s__Capnocytophaga_leadbetteri	0.16847	2.22097	0.19349	0	0.03925	0.27985	0	0	1.21809	1.27539	0.6141	0.79891	2.90874	1.32602	1.49942	3.23075	2.90357	0.34787	1.86194	2.03837	1.54321	0	0.71641	0.3563	2.52451	0	0.2746	0.25371	0.37745	0.34384	2.31063	0	0.62425	0.22764	2.06331	1.71257	0.83279	1.23125	0.06536	2.10526	0.55933	1.74535	0.29842	0.51564	0.50199	3.07962	6.39732	2.67834	1.80019
k__Bacteria|p__Bacteroidetes|c__Flavobacteriia|o__Flavobacteriales|f__Flavobacteriaceae|g__Capnocytophaga|s__Capnocytophaga_ochracea	0.1995	0.5203	0.83671	0	0.0132	1.1728	0	0	8.12694	3.3769	3.62329	3.41434	1.50732	0.97428	1.39709	0.25623	0.48102	0.8702	1.04851	0.75188	1.18057	0	1.05104	0.93517	1.63176	0	0.08079	0.15754	0.19007	0	0.57269	0	0.61322	0.25201	1.5859	2.44794	2.02624	2.88734	7.12108	3.37956	2.25365	0.5119	0.18932	1.55935	2.4138	0.49123	1.13529	1.24291	0.8419
k__Bacteria|p__Bacteroidetes|c__Flavobacteriia|o__Flavobacteriales|f__Flavobacteriaceae|g__Capnocytophaga|s__Capnocytophaga_sp_oral_taxon_332	0	2.28906	0.00657	0	0.00493	0	0	0	0	0	0	0	0.3459	0.52404	0.2699	1.7242	0.81864	0.00223	0.58974	1.79159	0.30016	0	0.00583	0.00886	1.48565	0	0.10792	0	0.0271	0	0	0	0	0	0	0.04732	0.14786	0.09669	0	0.00703	0.02821	0.50519	0.02694	0.12634	0.37853	0.05663	1.79577	1.28923	0.79468
k__Bacteria|p__Bacteroidetes|c__Flavobacteriia|o__Flavobacteriales|f__Flavobacteriaceae|g__Capnocytophaga|s__Capnocytophaga_sp_oral_taxon_338	0	0.00179	0.02542	0	0	0	0	0	0	0	0.01917	0.02368	0.05298	0.09692	0.02117	0.01577	0.00951	0	0.00261	0.00891	0.00324	0	0.00057	0	0.0714	0	0	0	0	0	0	0	0	0	0.01398	0.02207	0.04216	0.02249	0	0.75472	0.03857	0.00424	0	0.00249	0.0162	0.01083	0.05359	0.03056	0.045
k__Bacteria|p__Bacteroidetes|c__Flavobacteriia|o__Flavobacteriales|f__Flavobacteriaceae|g__Capnocytophaga|s__Capnocytophaga_sp_oral_taxon_863	0	0.42757	0.03863	0	0	0	0	0	0.01372	0.11831	0	0	2.27068	2.56027	0.02689	0.07979	0.18798	0.00368	0.56732	1.16791	0.24835	0	0.12321	0.04544	0.15007	0	0.00251	0	0.01324	0	0	0	0.06362	0.00874	0.01533	0.06457	0.023	0.02499	0	0	0.11928	0.05241	0.00886	0.01845	0.04225	0.07744	0.81139	0.58799	0.79163
k__Bacteria|p__Bacteroidetes|c__Flavobacteriia|o__Flavobacteriales|f__Flavobacteriaceae|g__Capnocytophaga|s__Capnocytophaga_sp_oral_taxon_878	0	0.01396	0	0	0	0	0	0	0	0	0	0	0	0	0	0	0	0	0	0.00038	0	0	0	0	0	0	0	0	0	0	0	0	0	0	0	0	0	0	0	0	0	0	0	0.00039	0.00086	0	0	0.00058	0.00325
k__Bacteria|p__Bacteroidetes|c__Flavobacteriia|o__Flavobacteriales|f__Flavobacteriaceae|g__Capnocytophaga|s__Capnocytophaga_sputigena	1.46546	0.9612	0.59739	0.57889	0.06663	1.9508	0	11.6947	0.59172	0.90615	0.39726	0.29637	0.18214	0.35066	0.59937	0.22473	0.34157	0.31041	0.26517	0.31144	0.73394	0	0.81467	0.52661	1.38786	0.79044	0.03431	0.17472	0.07787	0	0.86823	0.20252	0.37389	0.12352	1.07879	0.44756	0.5866	0.32008	3.22734	1.76261	0.51483	0.88952	0.45981	0.64847	0.70313	2.66289	1.57758	1.16096	1.38575
k__Bacteria|p__Chloroflexi	0	0.05583	1.07777	0	0.3084	0	0.05008	0	0	0	0	0	0.00155	0	0	0.14055	0.68672	0.29464	0.03468	0.12291	0.0174	0	0	0	0	0	0.1958	0.4902	0.35407	0.13948	0	0	0.02847	0	0.28088	0.72339	0	0	0	0	0	0.17613	0.358	0.02943	0.01099	0.04924	0.22832	0.0243	0.01633
k__Bacteria|p__Chloroflexi|c__Anaerolineae	0	0.05583	1.07777	0	0.3084	0	0.05008	0	0	0	0	0	0.00155	0	0	0.14055	0.68672	0.29464	0.03468	0.12291	0.0174	0	0	0	0	0	0.1958	0.4902	0.35407	0.13948	0	0	0.02847	0	0.28088	0.72339	0	0	0	0	0	0.17343	0.358	0.02344	0.00511	0.03657	0.22832	0.01656	0.01397
k__Bacteria|p__Chloroflexi|c__Anaerolineae|o__Anaerolineales	0	0.05583	1.07777	0	0.3084	0	0.05008	0	0	0	0	0	0.00155	0	0	0.14055	0.68672	0.29464	0.03468	0.12291	0.0174	0	0	0	0	0	0.1958	0.4902	0.35407	0.13948	0	0	0.02847	0	0.28088	0.72339	0	0	0	0	0	0.17343	0.358	0.02344	0.00511	0.03657	0.22832	0.01656	0.01397
k__Bacteria|p__Chloroflexi|c__Anaerolineae|o__Anaerolineales|f__Anaerolineaceae	0	0.05583	1.07777	0	0.3084	0	0.05008	0	0	0	0	0	0.00155	0	0	0.14055	0.68672	0.29464	0.03468	0.12291	0.0174	0	0	0	0	0	0.1958	0.4902	0.35407	0.13948	0	0	0.02847	0	0.28088	0.72339	0	0	0	0	0	0.17343	0.358	0.02344	0.00511	0.03657	0.22832	0.01656	0.01397
k__Bacteria|p__Chloroflexi|c__Anaerolineae|o__Anaerolineales|f__Anaerolineaceae|g__Anaerolineaceae_unclassified	0	0.05583	1.07777	0	0.3084	0	0.05008	0	0	0	0	0	0.00155	0	0	0.14055	0.68672	0.29464	0.03468	0.12291	0.0174	0	0	0	0	0	0.1958	0.4902	0.35407	0.13948	0	0	0.02847	0	0.28088	0.72339	0	0	0	0	0	0.17343	0.358	0.02344	0.00511	0.03657	0.22832	0.01656	0.01397
k__Bacteria|p__Chloroflexi|c__Anaerolineae|o__Anaerolineales|f__Anaerolineaceae|g__Anaerolineaceae_unclassified|s__Anaerolineaceae_bacterium_oral_taxon_439	0	0.05583	1.07777	0	0.3084	0	0.05008	0	0	0	0	0	0.00155	0	0	0.14055	0.68672	0.29464	0.03468	0.12291	0.0174	0	0	0	0	0	0.1958	0.4902	0.35407	0.13948	0	0	0.02847	0	0.28088	0.72339	0	0	0	0	0	0.17343	0.358	0.02344	0.00511	0.03657	0.22832	0.01656	0.01397
k__Bacteria|p__Chloroflexi|c__Caldilineae	0	0	0	0	0	0	0	0	0	0	0	0	0	0	0	0	0	0	0	0	0	0	0	0	0	0	0	0	0	0	0	0	0	0	0	0	0	0	0	0	0	0	0	0.00064	0	0	0	0	0
k__Bacteria|p__Chloroflexi|c__Caldilineae|o__Caldilineales	0	0	0	0	0	0	0	0	0	0	0	0	0	0	0	0	0	0	0	0	0	0	0	0	0	0	0	0	0	0	0	0	0	0	0	0	0	0	0	0	0	0	0	0.00064	0	0	0	0	0
k__Bacteria|p__Chloroflexi|c__Caldilineae|o__Caldilineales|f__Caldilineaceae	0	0	0	0	0	0	0	0	0	0	0	0	0	0	0	0	0	0	0	0	0	0	0	0	0	0	0	0	0	0	0	0	0	0	0	0	0	0	0	0	0	0	0	0.00064	0	0	0	0	0
k__Bacteria|p__Chloroflexi|c__Caldilineae|o__Caldilineales|f__Caldilineaceae|g__Litorilinea	0	0	0	0	0	0	0	0	0	0	0	0	0	0	0	0	0	0	0	0	0	0	0	0	0	0	0	0	0	0	0	0	0	0	0	0	0	0	0	0	0	0	0	0.00064	0	0	0	0	0
k__Bacteria|p__Chloroflexi|c__Caldilineae|o__Caldilineales|f__Caldilineaceae|g__Litorilinea|s__Litorilinea_aerophila	0	0	0	0	0	0	0	0	0	0	0	0	0	0	0	0	0	0	0	0	0	0	0	0	0	0	0	0	0	0	0	0	0	0	0	0	0	0	0	0	0	0	0	0.00064	0	0	0	0	0
k__Bacteria|p__Chloroflexi|c__Chloroflexia	0	0	0	0	0	0	0	0	0	0	0	0	0	0	0	0	0	0	0	0	0	0	0	0	0	0	0	0	0	0	0	0	0	0	0	0	0	0	0	0	0	0.0027	0	0.00535	0.00587	0.01267	0	0.00774	0.00236
k__Bacteria|p__Chloroflexi|c__Chloroflexia|o__Chloroflexales	0	0	0	0	0	0	0	0	0	0	0	0	0	0	0	0	0	0	0	0	0	0	0	0	0	0	0	0	0	0	0	0	0	0	0	0	0	0	0	0	0	0.0027	0	0.00535	0.00587	0.01267	0	0.00774	0.00236
k__Bacteria|p__Chloroflexi|c__Chloroflexia|o__Chloroflexales|f__Roseiflexaceae	0	0	0	0	0	0	0	0	0	0	0	0	0	0	0	0	0	0	0	0	0	0	0	0	0	0	0	0	0	0	0	0	0	0	0	0	0	0	0	0	0	0.0027	0	0.00535	0.00587	0.01267	0	0.00774	0.00236
k__Bacteria|p__Chloroflexi|c__Chloroflexia|o__Chloroflexales|f__Roseiflexaceae|g__Kouleothrix	0	0	0	0	0	0	0	0	0	0	0	0	0	0	0	0	0	0	0	0	0	0	0	0	0	0	0	0	0	0	0	0	0	0	0	0	0	0	0	0	0	0.0027	0	0.00535	0.00587	0.01267	0	0.00774	0.00236
k__Bacteria|p__Chloroflexi|c__Chloroflexia|o__Chloroflexales|f__Roseiflexaceae|g__Kouleothrix|s__Kouleothrix_aurantiaca	0	0	0	0	0	0	0	0	0	0	0	0	0	0	0	0	0	0	0	0	0	0	0	0	0	0	0	0	0	0	0	0	0	0	0	0	0	0	0	0	0	0.0027	0	0.00535	0.00587	0.01267	0	0.00774	0.00236
k__Bacteria|p__Firmicutes	20.6506	14.7914	20.1712	8.28521	22.0658	20.7543	43.9931	7.58635	6.97514	8.75233	21.852	14.0309	12.5675	9.80131	16.5393	14.516	13.6583	21.7021	17.2884	8.12636	12.5818	13.9717	9.07013	7.27871	9.62289	18.2048	24.3436	24.6818	34.5971	23.335	11.898	21.9527	16.2512	16.7312	13.1003	17.6046	16.6983	19.8344	47.4663	43.1484	52.7928	18.3862	28.5325	19.6358	17.5797	13.0236	22.9099	21.0843	26.0376
k__Bacteria|p__Firmicutes|c__Bacilli	17.7223	9.63418	7.80671	6.10271	1.16578	8.65991	6.75878	4.91346	3.91559	5.14131	6.2885	5.19933	2.43518	4.27975	10.2122	11.738	7.95815	5.47399	5.08004	3.55977	4.09051	13.9717	6.64392	2.75623	6.78479	17.7348	4.47331	1.22302	2.40859	3.62318	5.36558	9.14351	4.14985	5.52082	7.09549	4.37811	9.99669	6.8957	18.972	22.653	33.6818	5.10817	4.82958	6.83058	5.10909	11.0957	8.1182	7.08963	9.82228
k__Bacteria|p__Firmicutes|c__Bacilli|o__Bacillales	0	0.01398	0.13264	0	0	0.37228	0.25343	0	0.15236	0.34186	0.20871	0.2299	0.70357	0.57767	0.7509	2.65006	0.97598	0.38382	0.94394	0.41912	0.72221	0	0.01949	0.01563	0.535	0	0.39046	0.0827	0.24219	0.18555	0.52104	0.33439	0.1593	0.10794	0.22091	0.47753	1.41823	2.27318	3.20398	3.02601	2.11728	1.25365	1.9826	0.97311	0.63455	0.06234	1.4682	3.18352	4.36402
k__Bacteria|p__Firmicutes|c__Bacilli|o__Bacillales|f__Bacillaceae	0	0	0	0	0	0	0	0	0	0	0	0	0	0	0	0	0	0	0	0	0	0	0	0	0	0	0	0	0	0	0	0	0	0	0	0	0	0	0	0	0	0.00622	0	0.00442	0.00218	0.00348	0	0.00301	0
k__Bacteria|p__Firmicutes|c__Bacilli|o__Bacillales|f__Bacillaceae|g__Hydrogenibacillus	0	0	0	0	0	0	0	0	0	0	0	0	0	0	0	0	0	0	0	0	0	0	0	0	0	0	0	0	0	0	0	0	0	0	0	0	0	0	0	0	0	0.00622	0	0.00442	0.00218	0.00348	0	0.00301	0
k__Bacteria|p__Firmicutes|c__Bacilli|o__Bacillales|f__Bacillaceae|g__Hydrogenibacillus|s__Hydrogenibacillus_schlegelii	0	0	0	0	0	0	0	0	0	0	0	0	0	0	0	0	0	0	0	0	0	0	0	0	0	0	0	0	0	0	0	0	0	0	0	0	0	0	0	0	0	0.00622	0	0.00442	0.00218	0.00348	0	0.00301	0
k__Bacteria|p__Firmicutes|c__Bacilli|o__Bacillales|f__Bacillales_unclassified	0	0.01398	0.13264	0	0	0.37228	0.25343	0	0.15236	0.34186	0.20871	0.2299	0.70357	0.57767	0.7509	2.65006	0.97598	0.38382	0.94394	0.41912	0.72221	0	0.01949	0.01563	0.535	0	0.39046	0.0827	0.24219	0.18555	0.52104	0.33439	0.1593	0.10794	0.22091	0.47753	1.41823	2.27318	3.20398	3.02601	2.11728	1.24743	1.9826	0.96869	0.63237	0.05887	1.4682	3.18051	4.36402
k__Bacteria|p__Firmicutes|c__Bacilli|o__Bacillales|f__Bacillales_unclassified|g__Gemella	0	0.01398	0.13264	0	0	0.37228	0.25343	0	0.15236	0.34186	0.20871	0.2299	0.70357	0.57767	0.7509	2.65006	0.97598	0.38382	0.94394	0.41912	0.72221	0	0.01949	0.01563	0.535	0	0.39046	0.0827	0.24219	0.18555	0.52104	0.33439	0.1593	0.10794	0.22091	0.47753	1.41823	2.27318	3.20398	3.02601	2.11728	1.24743	1.9826	0.96869	0.63237	0.05887	1.4682	3.18051	4.36402
k__Bacteria|p__Firmicutes|c__Bacilli|o__Bacillales|f__Bacillales_unclassified|g__Gemella|s__Gemella_bergeri	0	0	0.04695	0	0	0	0	0	0	0	0	0	0	0	0	0.01541	0.05842	0.00439	0.01067	0.00533	0	0	0.00571	0	0	0	0.04397	0	0.00865	0.07463	0	0	0	0	0.06619	0	0	0	0	0	0	0.16255	0.21581	0.08148	0.11034	0.02115	0.66176	0.18071	0.35092
k__Bacteria|p__Firmicutes|c__Bacilli|o__Bacillales|f__Bacillales_unclassified|g__Gemella|s__Gemella_haemolysans	0	0	0	0	0	0	0	0	0.01476	0.06426	0	0	0.02469	0.03841	0.09528	0.02251	0.01332	0.007	0.00678	0.02914	0.04085	0	0	0.00275	0.02615	0	0.0313	0	0	0	0	0	0	0.01915	0.06621	0.03652	0.03068	0.0276	0.05776	0.07573	0.71509	0.02365	0.04796	0.09708	0.02643	0.0134	0.09811	0.07472	0.08281
k__Bacteria|p__Firmicutes|c__Bacilli|o__Bacillales|f__Bacillales_unclassified|g__Gemella|s__Gemella_morbillorum	0	0.01398	0.08216	0	0	0.37228	0.25343	0	0.13624	0.27578	0.20719	0.2299	0.67888	0.53926	0.62737	2.52467	0.8713	0.31222	0.86737	0.37339	0.60613	0	0.01378	0.01288	0.50885	0	0.29721	0.07856	0.22736	0.11092	0.52104	0.33439	0.1593	0.08879	0.08461	0.43657	1.31504	2.15568	3.14622	2.91812	1.40219	1.02783	1.66462	0.73707	0.47558	0.01784	0.64273	2.74389	3.74503
k__Bacteria|p__Firmicutes|c__Bacilli|o__Bacillales|f__Bacillales_unclassified|g__Gemella|s__Gemella_sanguinis	0	0	0.00353	0	0	0	0	0	0.00137	0.00181	0.00153	0	0	0	0.02824	0.08747	0.03294	0.06022	0.05912	0.01125	0.07523	0	0	0	0	0	0.01797	0.00413	0.00619	0	0	0	0	0	0.0039	0.00444	0.0725	0.08991	0	0.03216	0	0.0334	0.05422	0.05306	0.02001	0.00648	0.0656	0.1812	0.18526
k__Bacteria|p__Firmicutes|c__Bacilli|o__Lactobacillales	17.7223	9.6202	7.67407	6.10271	1.16578	8.28762	6.50535	4.91346	3.76323	4.79945	6.07979	4.96943	1.7316	3.70208	9.46129	9.08798	6.98217	5.09017	4.13611	3.14065	3.3683	13.9717	6.62442	2.7406	6.24979	17.7348	4.08286	1.14032	2.1664	3.43763	4.84454	8.80913	3.99055	5.41288	6.87458	3.90058	8.57847	4.62252	15.7681	19.627	31.5645	3.85452	2.84698	5.85747	4.47454	11.0334	6.65	3.90611	5.45825
k__Bacteria|p__Firmicutes|c__Bacilli|o__Lactobacillales|f__Aerococcaceae	0.01736	0.92299	0.67117	0	0	0.0822	0	0	0	0	0	0	0	0	0.00976	0.18221	0.37227	0	0.06692	0.03397	0.08425	0	0.00562	0	0.01907	0	0	0	0	0	0	0	0	0	0.05318	0.04806	0.01181	0	0	0	0.37625	0	0	0.77761	0.27587	0.05329	0.09161	0.2712	0.30531
k__Bacteria|p__Firmicutes|c__Bacilli|o__Lactobacillales|f__Aerococcaceae|g__Abiotrophia	0.01736	0.92299	0.67117	0	0	0.0822	0	0	0	0	0	0	0	0	0.00976	0.18221	0.37227	0	0.06692	0.03397	0.08425	0	0.00562	0	0.01907	0	0	0	0	0	0	0	0	0	0.05318	0.04806	0.01181	0	0	0	0.37625	0	0	0.77761	0.27587	0.05329	0.09161	0.2712	0.30531
k__Bacteria|p__Firmicutes|c__Bacilli|o__Lactobacillales|f__Aerococcaceae|g__Abiotrophia|s__Abiotrophia_defectiva	0	0.67347	0.10156	0	0	0	0	0	0	0	0	0	0	0	0	0.02098	0.02496	0	0.00093	0.00988	0.02493	0	0	0	0	0	0	0	0	0	0	0	0	0	0.01321	0.00731	0	0	0	0	0.25554	0	0	0.09323	0.04846	0.00995	0.00463	0.12828	0.13847
k__Bacteria|p__Firmicutes|c__Bacilli|o__Lactobacillales|f__Aerococcaceae|g__Abiotrophia|s__Abiotrophia_sp_HMSC24B09	0.01736	0.24952	0.56961	0	0	0.0822	0	0	0	0	0	0	0	0	0.00976	0.16123	0.34731	0	0.06598	0.02409	0.05932	0	0.00562	0	0.01907	0	0	0	0	0	0	0	0	0	0.03997	0.04075	0.01181	0	0	0	0.12071	0	0	0.68438	0.2274	0.04334	0.08698	0.14291	0.16684
k__Bacteria|p__Firmicutes|c__Bacilli|o__Lactobacillales|f__Carnobacteriaceae	0.06371	0.001	0.00362	0	0	0	0	0	0	0	0.0142	0.02408	0	0.00494	0.04517	0.12305	0.02575	0.03262	0.07071	0.01049	0.02144	0	0.04259	0.00905	0.02432	0	0.00506	0.01323	0	0	0	0	0	0	0.04938	0.04128	0.03653	0.03295	0	0	1.57231	0.02551	0.01247	0.05542	0.0378	0.04546	0.00925	0.17494	0.23202
k__Bacteria|p__Firmicutes|c__Bacilli|o__Lactobacillales|f__Carnobacteriaceae|g__Agitococcus	0	0	0	0	0	0	0	0	0	0	0	0	0	0	0	0	0	0	0	0	0	0	0	0	0	0	0	0	0	0	0	0	0	0	0	0	0	0	0	0	0	0.00435	0.00195	0.00423	0.01087	0.00731	0	0.00205	0.00739
k__Bacteria|p__Firmicutes|c__Bacilli|o__Lactobacillales|f__Carnobacteriaceae|g__Agitococcus|s__Agitococcus_lubricus	0	0	0	0	0	0	0	0	0	0	0	0	0	0	0	0	0	0	0	0	0	0	0	0	0	0	0	0	0	0	0	0	0	0	0	0	0	0	0	0	0	0.00435	0.00195	0.00423	0.01087	0.00731	0	0.00205	0.00739
k__Bacteria|p__Firmicutes|c__Bacilli|o__Lactobacillales|f__Carnobacteriaceae|g__Granulicatella	0.06371	0.001	0.00362	0	0	0	0	0	0	0	0.0142	0.02408	0	0.00494	0.04517	0.12305	0.02575	0.03262	0.07071	0.01049	0.02144	0	0.04259	0.00905	0.02432	0	0.00506	0.01323	0	0	0	0	0	0	0.04938	0.04128	0.03653	0.03295	0	0	1.57231	0.02116	0.01053	0.05119	0.02693	0.03815	0.00925	0.17289	0.22464
k__Bacteria|p__Firmicutes|c__Bacilli|o__Lactobacillales|f__Carnobacteriaceae|g__Granulicatella|s__Granulicatella_adiacens	0	0	0.00362	0	0	0	0	0	0	0	0.0142	0.02408	0	0.00494	0.03551	0.09963	0.01972	0.0233	0.04716	0.00672	0.00501	0	0.03365	0.00545	0.01609	0	0.00299	0.01323	0	0	0	0	0	0	0.00795	0.01506	0.03653	0.03295	0	0	0.04099	0.00921	0.01053	0.02107	0.01216	0.01846	0	0.10501	0.14992
k__Bacteria|p__Firmicutes|c__Bacilli|o__Lactobacillales|f__Carnobacteriaceae|g__Granulicatella|s__Granulicatella_elegans	0.06371	0.001	0	0	0	0	0	0	0	0	0	0	0	0	0.00966	0.02343	0.00603	0.00932	0.02356	0.00378	0.01643	0	0.00893	0.0036	0.00824	0	0.00207	0	0	0	0	0	0	0	0.04143	0.02621	0	0	0	0	1.53132	0.01195	0	0.03012	0.01476	0.01969	0.00925	0.06787	0.07471
k__Bacteria|p__Firmicutes|c__Bacilli|o__Lactobacillales|f__Lactobacillaceae	0	0	0	0	0	0	0	0	0	0	0	0	0	0	0	0	0	0	0	0	0	0	0	0.41288	0	0	0	0	0	0	0	0	0	0	0	0	0	0	0	0	0	0	0	0	0	0	0	0	0.00163
k__Bacteria|p__Firmicutes|c__Bacilli|o__Lactobacillales|f__Lactobacillaceae|g__Lactobacillus	0	0	0	0	0	0	0	0	0	0	0	0	0	0	0	0	0	0	0	0	0	0	0	0.41288	0	0	0	0	0	0	0	0	0	0	0	0	0	0	0	0	0	0	0	0	0	0	0	0	0
k__Bacteria|p__Firmicutes|c__Bacilli|o__Lactobacillales|f__Lactobacillaceae|g__Lactobacillus|s__Lactobacillus_fermentum	0	0	0	0	0	0	0	0	0	0	0	0	0	0	0	0	0	0	0	0	0	0	0	0.08975	0	0	0	0	0	0	0	0	0	0	0	0	0	0	0	0	0	0	0	0	0	0	0	0	0
k__Bacteria|p__Firmicutes|c__Bacilli|o__Lactobacillales|f__Lactobacillaceae|g__Lactobacillus|s__Lactobacillus_mucosae	0	0	0	0	0	0	0	0	0	0	0	0	0	0	0	0	0	0	0	0	0	0	0	0.10774	0	0	0	0	0	0	0	0	0	0	0	0	0	0	0	0	0	0	0	0	0	0	0	0	0
k__Bacteria|p__Firmicutes|c__Bacilli|o__Lactobacillales|f__Lactobacillaceae|g__Lactobacillus|s__Lactobacillus_oris	0	0	0	0	0	0	0	0	0	0	0	0	0	0	0	0	0	0	0	0	0	0	0	0.0427	0	0	0	0	0	0	0	0	0	0	0	0	0	0	0	0	0	0	0	0	0	0	0	0	0
k__Bacteria|p__Firmicutes|c__Bacilli|o__Lactobacillales|f__Lactobacillaceae|g__Lactobacillus|s__Lactobacillus_paragasseri	0	0	0	0	0	0	0	0	0	0	0	0	0	0	0	0	0	0	0	0	0	0	0	0.0016	0	0	0	0	0	0	0	0	0	0	0	0	0	0	0	0	0	0	0	0	0	0	0	0	0
k__Bacteria|p__Firmicutes|c__Bacilli|o__Lactobacillales|f__Lactobacillaceae|g__Lactobacillus|s__Lactobacillus_salivarius	0	0	0	0	0	0	0	0	0	0	0	0	0	0	0	0	0	0	0	0	0	0	0	0.17109	0	0	0	0	0	0	0	0	0	0	0	0	0	0	0	0	0	0	0	0	0	0	0	0	0
k__Bacteria|p__Firmicutes|c__Bacilli|o__Lactobacillales|f__Lactobacillaceae|g__Sharpea	0	0	0	0	0	0	0	0	0	0	0	0	0	0	0	0	0	0	0	0	0	0	0	0	0	0	0	0	0	0	0	0	0	0	0	0	0	0	0	0	0	0	0	0	0	0	0	0	0.00163
k__Bacteria|p__Firmicutes|c__Bacilli|o__Lactobacillales|f__Lactobacillaceae|g__Sharpea|s__Sharpea_azabuensis	0	0	0	0	0	0	0	0	0	0	0	0	0	0	0	0	0	0	0	0	0	0	0	0	0	0	0	0	0	0	0	0	0	0	0	0	0	0	0	0	0	0	0	0	0	0	0	0	0.00163
k__Bacteria|p__Firmicutes|c__Bacilli|o__Lactobacillales|f__Streptococcaceae	17.6412	8.6962	6.99928	6.10271	1.16578	8.20542	6.50535	4.91346	3.76323	4.79945	6.06559	4.94535	1.7316	3.69714	9.40635	8.78271	6.58415	5.05755	3.99847	3.09619	3.26262	13.9717	6.57622	2.31867	6.2064	17.7348	4.0778	1.12709	2.1664	3.43763	4.84454	8.80913	3.99055	5.41288	6.77202	3.81124	8.53013	4.58957	15.7681	19.627	29.6159	3.829	2.83451	5.02444	4.16087	10.9346	6.54914	3.45997	4.91929
k__Bacteria|p__Firmicutes|c__Bacilli|o__Lactobacillales|f__Streptococcaceae|g__Streptococcus	17.6412	8.6962	6.99928	6.10271	1.16578	8.20542	6.50535	4.91346	3.76323	4.79945	6.06559	4.94535	1.7316	3.69714	9.40635	8.78271	6.58415	5.05755	3.99847	3.09619	3.26262	13.9717	6.57622	2.31867	6.2064	17.7348	4.0778	1.12709	2.1664	3.43763	4.84454	8.80913	3.99055	5.41288	6.77202	3.81124	8.53013	4.58957	15.7681	19.627	29.6159	3.829	2.83451	5.02444	4.16087	10.9346	6.54914	3.45997	4.91929
k__Bacteria|p__Firmicutes|c__Bacilli|o__Lactobacillales|f__Streptococcaceae|g__Streptococcus|s__Streptococcus_anginosus_group	0	0.18776	0.13057	0	0.63795	0.26599	2.3107	0	0.19374	0.26438	1.09021	0.39647	0.26277	0.10253	0	0	0.00293	0.73455	0.15611	0.18435	0.2685	0	0.23428	0.18	0	0	0.00903	0.12466	0.58144	0	0.05958	2.89938	1.00702	0.98224	0	0.03704	0.01249	0.04385	0.06284	0.33711	0.12708	0.0407	0.48014	0.06963	0.19937	0.01764	0.46662	0.13957	0.4883
k__Bacteria|p__Firmicutes|c__Bacilli|o__Lactobacillales|f__Streptococcaceae|g__Streptococcus|s__Streptococcus_australis	0	0	0	0	0	0	0	0	0	0	0	0	0	0	0.03559	0.01932	0.00281	0.02939	0.00282	0.0349	0.04872	0	0.00271	0	0.02213	0	0	0	0	0	0	0	0	0	0.01179	0.01226	0.00256	0	0	0	0	0	0	0.002	0	0	0	0.03346	0.02598
k__Bacteria|p__Firmicutes|c__Bacilli|o__Lactobacillales|f__Streptococcaceae|g__Streptococcus|s__Streptococcus_cristatus	0	0.20212	0.98149	0	0.02472	0	0	0	2.30527	1.7495	1.68674	1.27128	0.13738	0.29201	2.0229	1.56547	0.14488	0.21498	0.2877	0.14175	0.13659	0	0.54329	0.08262	0.77166	0	0.23874	0.02181	0.02838	0	0	0	0.03388	0	0.01957	0.32902	0.94532	0.68807	0.88333	3.58879	0.42968	0.94783	0.16809	0.51112	0.4698	0.04604	0	1.22262	1.20175
k__Bacteria|p__Firmicutes|c__Bacilli|o__Lactobacillales|f__Streptococcaceae|g__Streptococcus|s__Streptococcus_gordonii	0.13763	2.02144	0.16748	0	0.06009	0	0	0	0	0	0	0.00402	0	0.01209	1.51047	0.35637	0.06354	1.44458	0.39323	0.08467	0.35949	1.23176	0.10669	0.03004	0.30382	0	0.07068	0.31375	0.12325	0	0.08895	1.67387	0	0	0.00547	0.00862	2.27477	1.31229	0.41162	1.87915	12.8541	0.2944	0.15954	0.33257	0.37531	0.04074	0.09612	0.64041	1.23787
k__Bacteria|p__Firmicutes|c__Bacilli|o__Lactobacillales|f__Streptococcaceae|g__Streptococcus|s__Streptococcus_infantis	0.24343	0.0293	0	0	0	0	0	0	0.00477	0.00438	0.00179	0.00257	0.01792	0.03752	0.35572	0.25805	0.14406	0.06363	0.03701	0.23957	0.05501	0	0.13527	0.02684	0.30739	0	0.05123	0.00577	0.01314	0	0	0	0.10824	0	0.17586	0.19269	0.60527	0.04044	0.0038	0	0	0.06119	0	0.15638	0.16102	0.00242	0	0.24961	0.38672
k__Bacteria|p__Firmicutes|c__Bacilli|o__Lactobacillales|f__Streptococcaceae|g__Streptococcus|s__Streptococcus_milleri	0	0.01833	0.02371	0	0	0	0	0	0	0	0	0	0.22407	0.06921	0	0	0	0.01313	0.04792	0.00897	0	0	0	0	0.01147	0	0.00649	0	0.36154	0	0	0	0.0572	0	0	0	0	0	0	0	0	0.01534	0.1778	0.00911	0.04222	0	0.29544	0.0578	0.13948
k__Bacteria|p__Firmicutes|c__Bacilli|o__Lactobacillales|f__Streptococcaceae|g__Streptococcus|s__Streptococcus_mitis	2.24745	0.00256	0	0	0	0	2.27312	0	0.04576	0.28574	0.09451	0.12486	0.26316	0.77209	0.41701	0.03558	0.07485	0.07648	0.05429	0.14161	0.23291	0	0.03392	0.01499	0.2122	0	0.07367	0.03517	0.02068	0.44316	0	0.15868	0.59564	0.2925	0.63547	0.52012	0.29515	0.16555	1.92347	1.0261	5.53939	0.00211	0	0.02938	0.09754	0.06288	0.15286	0.04823	0.03466
k__Bacteria|p__Firmicutes|c__Bacilli|o__Lactobacillales|f__Streptococcaceae|g__Streptococcus|s__Streptococcus_mutans	0	0	0	0	0	0	0	0	0	0	0	0.00274	0	0.00322	0	0	0	0	0	0	0	0	0	0.00093	0	0	0	0	0	0	0	0.32817	0	0	0	0	0	0.00805	0	0	0.08293	0	0	0	0	0	0	0	0
k__Bacteria|p__Firmicutes|c__Bacilli|o__Lactobacillales|f__Streptococcaceae|g__Streptococcus|s__Streptococcus_oralis	10.3352	0.74966	0.69826	3.24197	0.20184	5.18324	1.23778	1.57218	0.96473	0.97734	1.18409	0.89363	0.54211	1.11373	1.40722	2.32068	0.85333	1.25597	2.22518	1.85975	1.39228	0.2641	4.03612	0.87984	1.84279	2.48164	0.76863	0.23265	0.38801	2.29158	0.86585	3.28977	2.02379	3.75293	3.73544	1.52529	1.33257	0.72884	5.37046	9.33464	9.78704	1.58401	1.5667	0.97583	0.95912	0.74331	0.6385	0.82955	0.98269
k__Bacteria|p__Firmicutes|c__Bacilli|o__Lactobacillales|f__Streptococcaceae|g__Streptococcus|s__Streptococcus_parasanguinis	0	0	0	0	0	0	0	0	0	0	0.00314	0.00478	0	0	0	0.00562	0	0.10314	0.04088	0	0.04765	0	0	0	0	0	0	0	0.00268	0	0	0	0	0	0	0	0	0	0	0	0.01514	0	0	0	0	0	0	0.0272	0.01169
k__Bacteria|p__Firmicutes|c__Bacilli|o__Lactobacillales|f__Streptococcaceae|g__Streptococcus|s__Streptococcus_peroris	0	0	0	0	0	0	0	0	0	0	0	0	0	0	0	0	0	0	0	0	0	0	0	0.00281	0	0	0	0	0	0	0	0	0	0	0	0	0	0	0	0	0	0	0	0	0	0	0	0.0044	0.02869
k__Bacteria|p__Firmicutes|c__Bacilli|o__Lactobacillales|f__Streptococcaceae|g__Streptococcus|s__Streptococcus_pseudopneumoniae	0	0	0	0	0	0	0	0	0	0	0	0	0	0	0.00804	0	0	0.00333	0	0	0	0	0	0	0	0	0	0	0	0	0	0	0	0	0	0	0	0	0	0	0	0	0	0	0	0	0	0	0
k__Bacteria|p__Firmicutes|c__Bacilli|o__Lactobacillales|f__Streptococcaceae|g__Streptococcus|s__Streptococcus_salivarius	0	0	0	0	0	0	0	0	0	0	0.00181	0	0	0	0	0.02604	0	0	0	0	0.03117	0	0	0.00167	0	0	0.01733	0	0	0	0	0.04988	0	0	0	0	0.00064	0	0	0	0	0	0	0	0	0	0	0.02915	0.00285
k__Bacteria|p__Firmicutes|c__Bacilli|o__Lactobacillales|f__Streptococcaceae|g__Streptococcus|s__Streptococcus_salivarius_CAG_79	0	0	0	0	0	0	0	0	0	0	0	0	0	0	0	0	0	0	0	0	0	0	0	0	0	0	0	0	0	0	0	0	0	0	0	0	0	0	0	0	0.00511	0	0	0	0	0	0	0	0
k__Bacteria|p__Firmicutes|c__Bacilli|o__Lactobacillales|f__Streptococcaceae|g__Streptococcus|s__Streptococcus_sanguinis	4.62442	5.43525	4.94492	2.86074	0.1168	2.75619	0	3.34128	0.23959	1.4164	0.97842	1.50428	0.23633	1.2507	3.53256	2.53409	2.72158	1.04143	0.60452	0.29951	0.45047	12.4759	1.43067	0.98435	2.62335	15.2531	0.44906	0.35568	0.19222	0.61642	3.62283	0.40938	0.16477	0.297	1.9546	0.64598	2.82989	1.32759	7.10043	3.41089	0.76281	0.42915	0.05108	2.83829	1.78682	9.99595	4.8328	0.06462	0.21544
k__Bacteria|p__Firmicutes|c__Bacilli|o__Lactobacillales|f__Streptococcaceae|g__Streptococcus|s__Streptococcus_sinensis	0.05316	0.04978	0.03437	0	0.12438	0	0	0	0	0	0	0	0.01755	0.03819	0	1.428	2.47471	0.01694	0.05346	0.03089	0.09593	0	0	0	0	0	2.38572	0	0.01863	0	0.20733	0	0	0	0.12952	0.38868	0.03028	0.18944	0	0	0	0.22335	0.17072	0.06881	0.02029	0.01894	0.04869	0.04167	0.07151
k__Bacteria|p__Firmicutes|c__Bacilli|o__Lactobacillales|f__Streptococcaceae|g__Streptococcus|s__Streptococcus_sobrinus	0	0	0	0	0	0	0	0	0	0	0	0	0	0	0	0	0	0	0	0	0	0	0	0	0	0	0	0	0	0	0	0	0	0	0	0	0	0	0	0	0	0	0	0	0	0	0	0	0
k__Bacteria|p__Firmicutes|c__Bacilli|o__Lactobacillales|f__Streptococcaceae|g__Streptococcus|s__Streptococcus_sp_A12	0	0	0	0	0	0	0	0	0	0	0	0	0	0	0.10991	0.00271	0.00289	0	0	0.00401	0	0	0.00728	0	0.08302	0	0	0	0	0	0	0	0	0	0.0371	0	0	0	0	0	0	0	0	0.00634	0	0	0	0.01736	0.02554
k__Bacteria|p__Firmicutes|c__Bacilli|o__Lactobacillales|f__Streptococcaceae|g__Streptococcus|s__Streptococcus_sp_F0442	0	0	0	0	0	0	0	0	0	0	0	0	0	0	0	0.00127	0	0	0	0	0	0	0	0	0	0	0	0	0	0	0	0	0	0	0	0	0	0	0	0	0	0	0	0	0	0	0	0	0
k__Bacteria|p__Firmicutes|c__Bacilli|o__Lactobacillales|f__Streptococcaceae|g__Streptococcus|s__Streptococcus_sp_HMSC034E03	0	0	0	0	0	0	0.40256	0	0	0	0	0	0	0	0	0	0	0.02304	0.00781	0.00412	0	0	0	0	0	0	0	0.01322	0.03014	0	0	0	0	0	0	0	0	0	0	0	0	0	0	0	0	0	0	0	0.00467
k__Bacteria|p__Firmicutes|c__Bacilli|o__Lactobacillales|f__Streptococcaceae|g__Streptococcus|s__Streptococcus_sp_HMSC067H01	0	0	0	0	0	0	0.28119	0	0	0	0	0	0	0	0.00695	0.00544	0	0.03697	0.0246	0	0	0	0	0	0	0	0	0.01581	0.09117	0	0	0	0	0	0	0	0	0	0	0	0	0	0	0	0	0	0	0	0.00226
k__Bacteria|p__Firmicutes|c__Bacilli|o__Lactobacillales|f__Streptococcaceae|g__Streptococcus|s__Streptococcus_sp_HMSC070B10	0	0	0	0	0	0	0	0	0	0	0	0	0	0.00443	0	0	0	0	0	0.01741	0	0	0.00229	0.00369	0	0	0	0	0	0.08647	0	0	0	0	0	0	0	0	0	0	0.01268	0	0	0	0	0	0	0	0
k__Bacteria|p__Firmicutes|c__Bacilli|o__Lactobacillales|f__Streptococcaceae|g__Streptococcus|s__Streptococcus_sp_HMSC071D03	0	0	0	0	0	0	0	0	0	0	0	0	0	0	0	0	0	0	0	0	0	0	0	0	0	0	0	0.00857	0	0	0	0	0	0	0	0	0	0	0	0	0	0	0	0	0	0	0	0	0
k__Bacteria|p__Firmicutes|c__Bacilli|o__Lactobacillales|f__Streptococcaceae|g__Streptococcus|s__Streptococcus_sp_HPH0090	0	0	0	0	0	0	0	0	0	0	0	0	0	0	0	0	0	0	0.00213	0	0	0	0	0	0	0	0	0	0	0	0	0	0	0	0	0	0	0	0	0	0	0	0	0.00251	0.00581	0	0	0	0
k__Bacteria|p__Firmicutes|c__Bacilli|o__Lactobacillales|f__Streptococcaceae|g__Streptococcus|s__Streptococcus_sp_M334	0	0	0	0	0	0	0	0	0	0	0	0	0.00416	0	0	0	0	0	0	0	0	0	0	0	0	0	0	0	0	0	0	0	0	0	0	0.00342	0	0.00639	0	0	0	0	0	0	0	0	0	0	0
k__Bacteria|p__Firmicutes|c__Bacilli|o__Lactobacillales|f__Streptococcaceae|g__Streptococcus|s__Streptococcus_sp_NLAE_zl_C503	0	0	0	0	0	0	0	0	0	0	1.02487	0.74073	0	0	0	0	0	0	0	0	0	0	0.04367	0.10841	0.02857	0	0	0	0	0	0	0	0	0.08821	0	0	0	0	0	0	0	0.02869	0	0	0	0	0	0	0
k__Bacteria|p__Firmicutes|c__Bacilli|o__Lactobacillales|f__Streptococcaceae|g__Streptococcus|s__Streptococcus_sp_SK643	0	0	0	0	0	0	0	0	0	0	0	0	0	0	0	0	0	0	0	0	0	0	0	0	0	0	0	0	0	0	0	0	0	0	0.06721	0.09262	0	0	0	0	0	0	0	0	0	0	0	0	0
k__Bacteria|p__Firmicutes|c__Bacilli|o__Lactobacillales|f__Streptococcaceae|g__Streptococcus|s__Streptococcus_sp_oral_taxon_056	0	0	0.00744	0	0	0	0	0	0.00937	0.10171	0	0	0.02617	0.00142	0	0.22208	0.09858	0	0.0005	0.04467	0.1439	0	0	0.00249	0	0	0.00721	0	0	0	0	0	0	0	0	0.00256	0.16539	0.03632	0	0.01446	0	0.08103	0.00683	0.00315	0.00669	0.00671	0.01812	0.05249	0.04005
k__Bacteria|p__Firmicutes|c__Bacilli|o__Lactobacillales|f__Streptococcaceae|g__Streptococcus|s__Streptococcus_sp_oral_taxon_058	0	0	0.01104	0	0	0	0	0	0	0	0	0	0	0	0	0.002	0	0	0	0	0	0	0	0	0	0	0	0	0	0	0	0	0	0	0	0.05294	0	0	0.01211	0	0	0.1212	0.05361	0.00993	0	0	0	0	0
k__Bacteria|p__Firmicutes|c__Bacilli|o__Lactobacillales|f__Streptococcaceae|g__Streptococcus|s__Streptococcus_vestibularis	0	0	0	0	0	0	0	0	0	0	0	0	0	0	0	0	0	0	0	0	0	0	0	0	0	0	0	0	0	0	0	0	0	0	0	0	0.02838	0.01326	0	0.03585	0	0	0	0	0.00426	0	0	0.00183	0
k__Bacteria|p__Firmicutes|c__Bacilli|o__Lactobacillales|f__Streptococcaceae|g__Streptococcus|s__Streptococcus_viridans	0	0	0	0	0	0	0	0	0	0	0	0	0	0	0	0	0	0	0.06033	0	0	0	0	0	0	0	0	0	0.31512	0	0	0	0	0	0	0	0.00743	0.02947	0	0	0	0	0	0.00938	0.03262	0	0	0	0.01916
k__Bacteria|p__Firmicutes|c__Clostridia	0	1.09045	8.94775	1.889	11.8506	10.069	32.7391	0	0.99671	2.18626	5.81298	2.19101	7.08048	2.87659	1.41295	1.05406	4.14437	3.56015	2.89459	3.0032	2.74945	0	0.62245	0.24562	1.13688	0	7.16697	18.9744	21.6302	18.6662	5.34013	1.4815	5.98248	4.25928	5.04897	10.8636	1.79824	4.38293	2.9721	3.96227	2.14941	3.14954	15.6794	5.08594	6.46162	1.39578	13.4063	3.00446	8.44114
k__Bacteria|p__Firmicutes|c__Clostridia|o__Clostridiales	0	1.09045	8.94775	1.889	11.8506	10.069	32.7391	0	0.99671	2.18626	5.81298	2.19101	7.08048	2.87659	1.41295	1.05406	4.14437	3.56015	2.89459	3.0032	2.74945	0	0.62245	0.24562	1.13688	0	7.16697	18.9744	21.6302	18.6662	5.34013	1.4815	5.98248	4.25928	5.04897	10.8636	1.79824	4.38293	2.9721	3.96227	2.14941	3.14954	15.6794	5.08594	6.46162	1.39578	13.4063	3.00446	8.44114
k__Bacteria|p__Firmicutes|c__Clostridia|o__Clostridiales|f__Catabacteriaceae	0	0	0	0	0	0	0	0	0	0	0	0	0	0	0	0	0.00341	0.0023	0.00066	0	0	0	0	0	0	0	0	0.00351	0.00238	0	0	0	0	0	0	0	0	0	0	0	0	0.00314	0.00883	0	0	0	0	0	0
k__Bacteria|p__Firmicutes|c__Clostridia|o__Clostridiales|f__Catabacteriaceae|g__Catabacter	0	0	0	0	0	0	0	0	0	0	0	0	0	0	0	0	0.00341	0.0023	0.00066	0	0	0	0	0	0	0	0	0.00351	0.00238	0	0	0	0	0	0	0	0	0	0	0	0	0.00314	0.00883	0	0	0	0	0	0
k__Bacteria|p__Firmicutes|c__Clostridia|o__Clostridiales|f__Catabacteriaceae|g__Catabacter|s__Catabacter_hongkongensis	0	0	0	0	0	0	0	0	0	0	0	0	0	0	0	0	0.00341	0.0023	0.00066	0	0	0	0	0	0	0	0	0.00351	0.00238	0	0	0	0	0	0	0	0	0	0	0	0	0.00314	0.00883	0	0	0	0	0	0
k__Bacteria|p__Firmicutes|c__Clostridia|o__Clostridiales|f__Clostridiales_Family_XIII_Incertae_Sedis	0	0.18751	4.93472	1.06119	7.70674	8.50549	22.8926	0	0.11098	0.78463	2.52612	0.75279	3.1599	0.79266	0.40519	0.4286	1.68495	1.41319	1.03055	1.33373	0.87734	0	0.42317	0.08753	0.13469	0	5.8109	14.0472	15.4126	16.1591	3.49614	0.64683	3.28685	3.28622	0.40295	0.84668	0.74281	1.73975	0.1973	2.97898	0.28393	1.6687	10.8922	1.81433	3.28183	0.12392	6.87909	1.54198	4.17172
k__Bacteria|p__Firmicutes|c__Clostridia|o__Clostridiales|f__Clostridiales_Family_XIII_Incertae_Sedis|g__Clostridiales_Family_XIII_Incertae_Sedis_unclassified	0	0.17994	4.73734	1.06119	7.58092	8.50549	22.1101	0	0.11098	0.77234	2.43464	0.7238	3.15384	0.78803	0.39631	0.39668	1.67976	1.22255	0.96034	1.27503	0.52096	0	0.41928	0.08605	0.13283	0	5.63884	14.0233	15.2736	16.0092	3.44233	0.45696	3.25321	3.24641	0.40295	0.83178	0.7268	1.67428	0.1973	2.97898	0.28393	1.65811	10.8629	1.54288	2.8679	0.12392	6.86933	1.16663	3.96458
k__Bacteria|p__Firmicutes|c__Clostridia|o__Clostridiales|f__Clostridiales_Family_XIII_Incertae_Sedis|g__Clostridiales_Family_XIII_Incertae_Sedis_unclassified|s__Eubacterium_brachy	0	0.01431	0.39932	0.25046	0.49714	2.43942	4.41145	0	0.10663	0.55546	1.70227	0.23258	0.68153	0.20948	0.11669	0	0.05382	0.0168	0.1354	0	0.0239	0	0.02719	0.00932	0.08036	0	0	0.97295	3.03819	0	3.36307	0	0.58964	0.95653	0.06223	0.04026	0.52258	0.62831	0.1973	1.63689	0.24574	0	0	0.09719	1.67477	0.01388	1.497	0.22099	1.18221
k__Bacteria|p__Firmicutes|c__Clostridia|o__Clostridiales|f__Clostridiales_Family_XIII_Incertae_Sedis|g__Clostridiales_Family_XIII_Incertae_Sedis_unclassified|s__Eubacterium_infirmum	0	0.07439	1.03096	0	1.97215	0.3618	0	0	0.00436	0.21688	0.49281	0.20638	0.44748	0.22509	0.27754	0.3601	0.1395	0.31043	0.24682	0.50744	0.1982	0	0.35117	0.06141	0.03192	0	5.33295	0.05759	0.91512	0	0	0.28762	0.3176	0.30665	0.00119	0.04264	0.20423	1.00069	0	0.1071	0	0.42081	1.3218	0.78453	0.4311	0	0	0.4598	1.16829
k__Bacteria|p__Firmicutes|c__Clostridia|o__Clostridiales|f__Clostridiales_Family_XIII_Incertae_Sedis|g__Clostridiales_Family_XIII_Incertae_Sedis_unclassified|s__Eubacterium_minutum	0	0	0	0	0	0	0	0	0	0	0	0	0.14368	0.1199	0.00208	0.01689	0.42527	0	0	0.00102	0.02595	0	0	0	0.00912	0	0.00616	0	0	0	0	0.01289	0.00177	0	0	0	0	0	0	0	0.03819	0.38307	0.59901	0.09113	0.03331	0	0.09307	0	0
k__Bacteria|p__Firmicutes|c__Clostridia|o__Clostridiales|f__Clostridiales_Family_XIII_Incertae_Sedis|g__Clostridiales_Family_XIII_Incertae_Sedis_unclassified|s__Eubacterium_nodatum	0	0	3.30705	0.81073	0	5.70427	0	0	0	0	0.23956	0.28483	1.88115	0.23356	0	0.0197	1.06116	0.34796	0.14861	0.22777	0.21002	0	0.02127	0.00518	0.01142	0	0.29973	4.6469	3.1783	1.52091	0.07925	0.15645	1.04619	0.46256	0.29239	0.69973	0	0.04528	0	1.03273	0	0.36162	2.78903	0.14038	0.55676	0.04743	3.54098	0.02661	0.01575
k__Bacteria|p__Firmicutes|c__Clostridia|o__Clostridiales|f__Clostridiales_Family_XIII_Incertae_Sedis|g__Clostridiales_Family_XIII_Incertae_Sedis_unclassified|s__Eubacterium_saphenum	0	0.09032	0	0	5.11163	0	17.6987	0	0	0	0	0	0	0	0	0	0	0.34459	0.22796	0.53746	0	0	0.01966	0.01014	0	0	0	8.33789	8.11548	14.4883	0	0	1.29801	1.52067	0.04714	0.04914	0	0	0	0.20226	0	0.49262	6.15302	0.42926	0.17196	0.06261	1.73828	0.10307	1.49786
k__Bacteria|p__Firmicutes|c__Clostridia|o__Clostridiales|f__Clostridiales_Family_XIII_Incertae_Sedis|g__Clostridiales_Family_XIII_Incertae_Sedis_unclassified|s__Eubacterium_sulci	0	0.00091	0	0	0	0	0	0	0	0	0	0	0	0	0	0	0	0.20277	0.20156	0.00134	0.06289	0	0	0	0	0	0	0.00797	0.02646	0	0	0	0	0	0	0	0	0	0	0	0	0	0	0.0004	0	0	0	0.35616	0.10048
k__Bacteria|p__Firmicutes|c__Clostridia|o__Clostridiales|f__Clostridiales_Family_XIII_Incertae_Sedis|g__Mogibacterium	0	0.00757	0.19738	0	0.12582	0	0.78245	0	0	0.01229	0.09148	0.02899	0.00606	0.00463	0.00888	0.03192	0.00519	0.19064	0.07021	0.05871	0.35638	0	0.00389	0.00147	0.00186	0	0.17206	0.02386	0.13908	0.14986	0.05381	0.18987	0.03364	0.03981	0	0.01491	0.01601	0.06547	0	0	0	0.01059	0.02939	0.27146	0.41392	0	0.00976	0.37535	0.20715
k__Bacteria|p__Firmicutes|c__Clostridia|o__Clostridiales|f__Clostridiales_Family_XIII_Incertae_Sedis|g__Mogibacterium|s__Mogibacterium_diversum	0	0.00757	0.18827	0	0.09032	0	0	0	0	0.01229	0.09148	0.02899	0.00606	0.00463	0.00805	0.03013	0.00231	0.17433	0.06047	0.02399	0.11594	0	0.00389	0.00147	0	0	0.14452	0.02195	0.10067	0	0	0.18987	0.01773	0.03981	0	0	0.01601	0.06547	0	0	0	0.00346	0.00786	0.04253	0.01169	0	0	0.3603	0.20335
k__Bacteria|p__Firmicutes|c__Clostridia|o__Clostridiales|f__Clostridiales_Family_XIII_Incertae_Sedis|g__Mogibacterium|s__Mogibacterium_pumilum	0	0	0.00912	0	0.0355	0	0	0	0	0	0	0	0	0	0.00083	0.00039	0	0.01585	0.00937	0	0.00631	0	0	0	0	0	0.00952	0.00092	0.03841	0	0	0	0	0	0	0.01491	0	0	0	0	0	0.00563	0.01787	0.10563	0.12849	0	0	0.00454	0.00239
k__Bacteria|p__Firmicutes|c__Clostridia|o__Clostridiales|f__Clostridiales_Family_XIII_Incertae_Sedis|g__Mogibacterium|s__Mogibacterium_timidum	0	0	0	0	0	0	0.78245	0	0	0	0	0	0	0	0	0.0014	0.00289	0.00046	0.00037	0.03472	0.23413	0	0	0	0.00186	0	0.01803	0.00099	0	0.14986	0.05381	0	0.01591	0	0	0	0	0	0	0	0	0.00151	0.00365	0.1233	0.27374	0	0.00976	0.01051	0.00141
k__Bacteria|p__Firmicutes|c__Clostridia|o__Clostridiales|f__Eubacteriaceae	0	0	1.11695	0	0.28677	0.79993	1.0007	0	0	0	0.01536	0	0	0	0	0	0.0693	0.06916	0.0626	0	0	0	0	0	0	0	0	0.56748	0.72838	0	0	0	0.02338	0	0	0	0	0	0	0	0	0	0	0	0	0.02506	0.56062	0.01357	0
k__Bacteria|p__Firmicutes|c__Clostridia|o__Clostridiales|f__Eubacteriaceae|g__Pseudoramibacter	0	0	1.11695	0	0.28677	0.79993	1.0007	0	0	0	0.01536	0	0	0	0	0	0.0693	0.06916	0.0626	0	0	0	0	0	0	0	0	0.56748	0.72838	0	0	0	0.02338	0	0	0	0	0	0	0	0	0	0	0	0	0.02506	0.56062	0.01357	0
k__Bacteria|p__Firmicutes|c__Clostridia|o__Clostridiales|f__Eubacteriaceae|g__Pseudoramibacter|s__Pseudoramibacter_alactolyticus	0	0	1.11695	0	0.28677	0.79993	1.0007	0	0	0	0.01536	0	0	0	0	0	0.0693	0.06916	0.0626	0	0	0	0	0	0	0	0	0.56748	0.72838	0	0	0	0.02338	0	0	0	0	0	0	0	0	0	0	0	0	0.02506	0.56062	0.01357	0
k__Bacteria|p__Firmicutes|c__Clostridia|o__Clostridiales|f__Lachnospiraceae	0	0.55401	0.6439	0	0.38016	0	0.23478	0	0.77938	1.01241	1.85188	1.21579	0.81451	0.9431	0.71578	0.27034	0.5688	1.52079	1.37726	0.96555	0.67944	0	0.12831	0.15322	0.72702	0	0.18521	0.15427	0.49188	0	0.8453	0.43754	0.3692	0.16393	4.11174	8.98979	0.95451	1.25277	2.41451	0.36313	1.79111	0.3908	0.33741	1.89442	1.15074	0.6703	1.2962	0.76009	0.28004
k__Bacteria|p__Firmicutes|c__Clostridia|o__Clostridiales|f__Lachnospiraceae|g__Catonella	0	0.23184	0.10597	0	0.07793	0	0.23478	0	0.04003	0.04934	0.19712	0.03651	0.34877	0.25231	0.03164	0.21639	0.27286	0.05857	0.15996	0.474	0.40934	0	0.00994	0.00463	0.1243	0	0.05046	0.07476	0.069	0	0.5703	0	0.2032	0.04165	0.25788	0.32542	0.18724	0.26952	0.08843	0.08961	0.17226	0.15013	0.18313	0.18612	0.25638	0.05196	0.11496	0.26136	0.12444
k__Bacteria|p__Firmicutes|c__Clostridia|o__Clostridiales|f__Lachnospiraceae|g__Catonella|s__Catonella_morbi	0	0.23184	0.10597	0	0.07793	0	0.23478	0	0.04003	0.04934	0.19712	0.03651	0.34877	0.25231	0.03164	0.21639	0.27286	0.05857	0.15996	0.474	0.40934	0	0.00994	0.00463	0.1243	0	0.05046	0.07476	0.069	0	0.5703	0	0.2032	0.04165	0.25788	0.32542	0.18724	0.26952	0.08843	0.08961	0.17226	0.15013	0.18313	0.18612	0.25638	0.05196	0.11496	0.26136	0.12444
k__Bacteria|p__Firmicutes|c__Clostridia|o__Clostridiales|f__Lachnospiraceae|g__Johnsonella	0	0.04937	0.09408	0	0	0	0	0	0.33066	0.69943	0.12251	0.01892	0.17784	0.09289	0.05064	0.04626	0.2958	0.01966	0.02041	0.01353	0.05016	0	0	0	0.34764	0	0.01476	0.01061	0.07924	0	0.275	0.03617	0	0	1.41603	1.30202	0.51584	0.46934	0	0	0.44492	0.0725	0.03296	0.21199	0.37802	0.26859	1.0176	0.00599	0.01455
k__Bacteria|p__Firmicutes|c__Clostridia|o__Clostridiales|f__Lachnospiraceae|g__Johnsonella|s__Johnsonella_ignava	0	0.04937	0.09408	0	0	0	0	0	0.33066	0.69943	0.12251	0.01892	0.17784	0.09289	0.05064	0.04626	0.2958	0.01966	0.02041	0.01353	0.05016	0	0	0	0.34764	0	0.01476	0.01061	0.07924	0	0.275	0.03617	0	0	1.41603	1.30202	0.51584	0.46934	0	0	0.44492	0.0725	0.03296	0.21199	0.37802	0.26859	1.0176	0.00599	0.01455
k__Bacteria|p__Firmicutes|c__Clostridia|o__Clostridiales|f__Lachnospiraceae|g__Lachnoanaerobaculum	0	0.21011	0.07581	0	0	0	0	0	0.31711	0.20649	1.01515	0.82074	0.09634	0.28217	0.41024	0.00184	0.00015	0.265	0.4052	0.17575	0.06439	0	0.08199	0.09818	0.17571	0	0	0.01249	0.03376	0	0	0	0.07026	0.04584	0	0.00192	0.24735	0.36457	2.30674	0.07466	1.01806	0.04652	0.0081	0.92464	0.19447	0.00745	0.03475	0.32012	0.09033
k__Bacteria|p__Firmicutes|c__Clostridia|o__Clostridiales|f__Lachnospiraceae|g__Lachnoanaerobaculum|s__Lachnoanaerobaculum_saburreum	0	0.21011	0.07581	0	0	0	0	0	0.31711	0.20649	1.01515	0.82074	0.09634	0.28217	0.41024	0	0	0.26121	0.40017	0.1514	0.06439	0	0.08199	0.09818	0.17571	0	0	0.01249	0.03376	0	0	0	0.07026	0.04584	0	0.00192	0.24735	0.36457	2.30674	0.07466	1.01806	0.04122	0.0081	0.919	0.1935	0.00745	0.03475	0.31584	0.08569
k__Bacteria|p__Firmicutes|c__Clostridia|o__Clostridiales|f__Lachnospiraceae|g__Lachnoanaerobaculum|s__Lachnoanaerobaculum_umeaense	0	0	0	0	0	0	0	0	0	0	0	0	0	0	0	0.00184	0.00015	0.00379	0.00503	0.02435	0	0	0	0	0	0	0	0	0	0	0	0	0	0	0	0	0	0	0	0	0	0.0053	0	0.00563	0.00097	0	0	0.00429	0.00464
k__Bacteria|p__Firmicutes|c__Clostridia|o__Clostridiales|f__Lachnospiraceae|g__Lachnospiraceae_unclassified	0	0.01764	0	0	0	0	0	0	0	0	0	0.00205	0	0	0.07965	0	0	0.37044	0.13568	0.05804	0.021	0	0	0	0.00792	0	0	0.0221	0.01343	0	0	0	0	0	0	0	0	0	0	0	0	0	0	0.4796	0.08992	0	0	0	0
k__Bacteria|p__Firmicutes|c__Clostridia|o__Clostridiales|f__Lachnospiraceae|g__Lachnospiraceae_unclassified|s__Lachnospiraceae_bacterium_oral_taxon_096	0	0.01764	0	0	0	0	0	0	0	0	0	0.00205	0	0	0.07965	0	0	0.37044	0.13568	0.05804	0.021	0	0	0	0.00792	0	0	0.0221	0.01343	0	0	0	0	0	0	0	0	0	0	0	0	0	0	0.4796	0.08992	0	0	0	0
k__Bacteria|p__Firmicutes|c__Clostridia|o__Clostridiales|f__Lachnospiraceae|g__Oribacterium	0	0.01654	0.33397	0	0.02455	0	0	0	0.09159	0.05715	0.48916	0.32256	0.16269	0.29994	0.14361	0.00585	0	0.28083	0.15667	0.24027	0.13455	0	0.00727	0	0.07145	0	0.00944	0.01538	0.02309	0	0	0.37899	0.08731	0.03184	2.43783	7.36042	0.00408	0.14933	0.01934	0.19886	0.15587	0.11875	0.11321	0.0904	0.23194	0.3423	0.12889	0.09899	0.03899
k__Bacteria|p__Firmicutes|c__Clostridia|o__Clostridiales|f__Lachnospiraceae|g__Oribacterium|s__Oribacterium_asaccharolyticum	0	0	0	0	0	0	0	0	0	0	0	0	0	0	0	0	0	0.00935	0.00355	0	0	0	0	0	0	0	0	0	0	0	0	0	0	0	0	0	0	0	0	0	0	0	0	0	0	0	0	0.00758	0
k__Bacteria|p__Firmicutes|c__Clostridia|o__Clostridiales|f__Lachnospiraceae|g__Oribacterium|s__Oribacterium_parvum	0	0	0	0	0	0	0	0	0	0	0	0	0	0	0	0	0	0	0	0	0	0	0	0	0	0	0.00382	0	0	0	0	0	0	0	0	0	0	0	0	0	0	0	0	0	0	0	0	0.01219	0.00434
k__Bacteria|p__Firmicutes|c__Clostridia|o__Clostridiales|f__Lachnospiraceae|g__Oribacterium|s__Oribacterium_sinus	0	0	0	0	0	0	0	0	0.01881	0	0.00805	0.01522	0	0	0	0.00585	0	0.03543	0.04591	0	0	0	0	0	0	0	0	0	0.00298	0	0	0	0	0	0	0	0.00408	0.01229	0	0	0	0	0	0.0147	0	0	0	0.04588	0.00423
k__Bacteria|p__Firmicutes|c__Clostridia|o__Clostridiales|f__Lachnospiraceae|g__Oribacterium|s__Oribacterium_sp_oral_taxon_078	0	0.01654	0.33397	0	0.02455	0	0	0	0.07278	0.05715	0.48111	0.30734	0.16269	0.29994	0.14361	0	0	0.23605	0.1072	0.24027	0.13455	0	0.00727	0	0.07145	0	0.00562	0.01538	0.02011	0	0	0.37899	0.08731	0.03184	2.43783	7.36042	0	0.13705	0.01934	0.19886	0.15587	0.11875	0.11321	0.0757	0.23194	0.3423	0.12889	0.03334	0.03042
k__Bacteria|p__Firmicutes|c__Clostridia|o__Clostridiales|f__Lachnospiraceae|g__Shuttleworthia	0	0	0.03407	0	0.15831	0	0	0	0	0	0	0	0.02887	0.01579	0	0	0	0.1523	0.19364	0.00397	0	0	0	0.03375	0	0	0.11055	0.00115	0.24213	0	0	0	0.00842	0.0183	0	0	0	0	0	0	0	0	0	0	0	0	0	0	0
k__Bacteria|p__Firmicutes|c__Clostridia|o__Clostridiales|f__Lachnospiraceae|g__Shuttleworthia|s__Shuttleworthia_satelles	0	0	0.03407	0	0.15831	0	0	0	0	0	0	0	0.02887	0.01579	0	0	0	0.1523	0.19364	0.00397	0	0	0	0.03375	0	0	0.11055	0.00115	0.24213	0	0	0	0.00842	0.0183	0	0	0	0	0	0	0	0	0	0	0	0	0	0	0
k__Bacteria|p__Firmicutes|c__Clostridia|o__Clostridiales|f__Lachnospiraceae|g__Stomatobaculum	0	0.02852	0	0	0.11937	0	0	0	0	0	0.02794	0.01502	0	0	0	0	0	0.37399	0.30571	0	0	0	0.0291	0.01666	0	0	0	0.01776	0.03124	0	0	0.02238	0	0.02629	0	0	0	0	0	0	0	0.00289	0	0.00167	0	0	0	0.07364	0.01173
k__Bacteria|p__Firmicutes|c__Clostridia|o__Clostridiales|f__Lachnospiraceae|g__Stomatobaculum|s__Stomatobaculum_longum	0	0.02852	0	0	0.11937	0	0	0	0	0	0.02794	0.01502	0	0	0	0	0	0.37399	0.30571	0	0	0	0.0291	0.01666	0	0	0	0.01776	0.03124	0	0	0.02238	0	0.02629	0	0	0	0	0	0	0	0.00289	0	0.00167	0	0	0	0.07364	0.01173
k__Bacteria|p__Firmicutes|c__Clostridia|o__Clostridiales|f__Peptostreptococcaceae	0	0.34893	2.25218	0.82781	3.47689	0.76362	8.6111	0	0.10634	0.38922	1.41961	0.22243	3.10607	1.14083	0.29198	0.35511	1.81791	0.5547	0.42352	0.70392	1.19266	0	0.07097	0.00487	0.27517	0	1.17087	4.20194	4.99493	2.50713	0.99869	0.39714	2.30305	0.80913	0.53428	1.0271	0.10091	1.39041	0.36029	0.62016	0.07436	1.0869	4.44092	1.37718	2.02906	0.5765	4.67044	0.68881	3.98938
k__Bacteria|p__Firmicutes|c__Clostridia|o__Clostridiales|f__Peptostreptococcaceae|g__Criibacterium	0	0	0	0	0	0	0	0	0	0	0	0	0	0	0	0	0	0	0.00391	0	0	0	0	0	0	0	0	0	0.00991	0	0	0	0	0	0	0	0	0	0	0	0	0	0	0	0	0	0	0	0
k__Bacteria|p__Firmicutes|c__Clostridia|o__Clostridiales|f__Peptostreptococcaceae|g__Criibacterium|s__Criibacterium_bergeronii	0	0	0	0	0	0	0	0	0	0	0	0	0	0	0	0	0	0	0.00391	0	0	0	0	0	0	0	0	0	0.00991	0	0	0	0	0	0	0	0	0	0	0	0	0	0	0	0	0	0	0	0
k__Bacteria|p__Firmicutes|c__Clostridia|o__Clostridiales|f__Peptostreptococcaceae|g__Filifactor	0	0.04011	1.49971	0.82781	2.08694	0.76362	6.17597	0	0	0.20729	1.07193	0.2109	2.00151	0.38791	0.00411	0.01529	0.65679	0.17615	0.20604	0.21037	0.36425	0	0.04243	0	0.0052	0	0.10008	2.93986	3.25148	2.50713	0.23464	0.23888	1.88152	0.79383	0.16572	0.48075	0	0.51785	0	0.39156	0.03841	0.28024	2.21387	0.58029	1.03853	0.04502	2.63991	0.11063	1.35614
k__Bacteria|p__Firmicutes|c__Clostridia|o__Clostridiales|f__Peptostreptococcaceae|g__Filifactor|s__Filifactor_alocis	0	0.04011	1.49971	0.82781	2.08694	0.76362	6.17597	0	0	0.20729	1.07193	0.2109	2.00151	0.38791	0.00411	0.01529	0.65679	0.17615	0.20604	0.21037	0.36425	0	0.04243	0	0.0052	0	0.10008	2.93986	3.25148	2.50713	0.23464	0.23888	1.88152	0.79383	0.16572	0.48075	0	0.51785	0	0.39156	0.03841	0.28024	2.21387	0.58029	1.03853	0.04502	2.63991	0.11063	1.35614
k__Bacteria|p__Firmicutes|c__Clostridia|o__Clostridiales|f__Peptostreptococcaceae|g__Peptoanaerobacter	0	0.26564	0.28855	0	0.22868	0	0	0	0.00245	0.05062	0.05092	0	0.23554	0.0771	0.00904	0.17405	0.55118	0.04422	0.07637	0.18577	0.09823	0	0.00825	0	0.10569	0	0.13651	0.05154	0.23844	0	0	0	0.11889	0	0.26497	0.24837	0.01043	0.1959	0.356	0.12345	0.03595	0.36327	0.2394	0.21063	0.50941	0.52114	1.01169	0.01374	0.14675
k__Bacteria|p__Firmicutes|c__Clostridia|o__Clostridiales|f__Peptostreptococcaceae|g__Peptoanaerobacter|s__Eubacterium_yurii	0	0.12139	0.15552	0	0.06267	0	0	0	0.00245	0.05062	0.01908	0	0.13121	0.0356	0.00904	0.17405	0.51796	0.02659	0.06975	0.02995	0.03066	0	0	0	0.10569	0	0.03605	0.03165	0.05505	0	0	0	0.02701	0	0.26497	0.24837	0.01043	0.1959	0.356	0.11821	0.03595	0.33122	0.20778	0.18032	0.47885	0.52114	0.9981	0.00295	0.09678
k__Bacteria|p__Firmicutes|c__Clostridia|o__Clostridiales|f__Peptostreptococcaceae|g__Peptoanaerobacter|s__Peptoanaerobacter_stomatis	0	0.14425	0.13303	0	0.16601	0	0	0	0	0	0.03184	0	0.10433	0.0415	0	0	0.03322	0.01763	0.00663	0.15581	0.06757	0	0.00825	0	0	0	0.10046	0.01989	0.18338	0	0	0	0.09187	0	0	0	0	0	0	0.00524	0	0.03206	0.03162	0.03031	0.03056	0	0.01359	0.01078	0.04997
k__Bacteria|p__Firmicutes|c__Clostridia|o__Clostridiales|f__Peptostreptococcaceae|g__Peptostreptococcaceae_unclassified	0	0	0	0	0.50972	0	1.28998	0	0	0	0	0	0	0	0	0	0	0.19112	0.01039	0.08798	0.00272	0	0	0	0.01899	0	0	0.97944	0.20982	0	0	0	0	0	0.04426	0.08673	0	0	0	0	0	0.05697	1.00808	0.05361	0.04543	0	0	0.00029	0.00234
k__Bacteria|p__Firmicutes|c__Clostridia|o__Clostridiales|f__Peptostreptococcaceae|g__Peptostreptococcaceae_unclassified|s__Peptostreptococcaceae_bacterium_oral_taxon_113	0	0	0	0	0.50972	0	1.28998	0	0	0	0	0	0	0	0	0	0	0.19112	0.01039	0.08798	0.00272	0	0	0	0.01899	0	0	0.97944	0.20982	0	0	0	0	0	0.04426	0.08673	0	0	0	0	0	0.05697	1.00808	0.05361	0.04543	0	0	0.00029	0.00234
k__Bacteria|p__Firmicutes|c__Clostridia|o__Clostridiales|f__Peptostreptococcaceae|g__Peptostreptococcus	0	0.04318	0.46392	0	0.65155	0	1.14515	0	0.10389	0.13131	0.29677	0.01153	0.86902	0.67581	0.27883	0.16577	0.60993	0.14321	0.12681	0.2198	0.72746	0	0.02029	0.00487	0.14529	0	0.93427	0.23111	1.28528	0	0.76405	0.15826	0.30264	0.01531	0.05933	0.21126	0.09048	0.67666	0.00429	0.10515	0	0.38641	0.97956	0.53265	0.43569	0.01034	1.01884	0.56416	2.48414
k__Bacteria|p__Firmicutes|c__Clostridia|o__Clostridiales|f__Peptostreptococcaceae|g__Peptostreptococcus|s__Peptostreptococcus_sp_MV1	0	0	0	0	0	0	0	0	0	0	0	0	0	0	0	0	0	0	0	0	0	0	0	0	0	0	0	0	0	0	0	0	0	0	0	0	0	0	0	0	0	0	0	0.00011	0	0	0	0.00154	0.00461
k__Bacteria|p__Firmicutes|c__Clostridia|o__Clostridiales|f__Peptostreptococcaceae|g__Peptostreptococcus|s__Peptostreptococcus_stomatis	0	0.04318	0.46392	0	0.65155	0	1.14515	0	0.10389	0.13131	0.29677	0.01153	0.86902	0.67581	0.27883	0.16577	0.60993	0.14321	0.12681	0.2198	0.72746	0	0.02029	0.00487	0.14529	0	0.93427	0.23111	1.28528	0	0.76405	0.15826	0.30264	0.01531	0.05933	0.21126	0.09048	0.67666	0.00429	0.10515	0	0.38641	0.97956	0.53254	0.43569	0.01034	1.01884	0.56262	2.47953
k__Bacteria|p__Firmicutes|c__Erysipelotrichia	0	0.10197	0.16085	0	4.43249	0.17875	0.76632	0	0.02947	0.10232	0.0903	0.08849	0.22236	0.13039	0.08282	0.99516	0.31829	1.10463	0.28499	0.05739	0.47426	0	0.03212	0.01643	0.09199	0.47007	11.5633	0.53784	1.23095	0.14166	0.06304	0.17195	0.63617	0.48983	0.00469	0.13133	0.01504	0.19961	0.10171	0.18604	0.06981	0.41558	0.86321	0.46817	0.38835	0.02934	0.44936	0.70455	1.03033
k__Bacteria|p__Firmicutes|c__Erysipelotrichia|o__Erysipelotrichales	0	0.10197	0.16085	0	4.43249	0.17875	0.76632	0	0.02947	0.10232	0.0903	0.08849	0.22236	0.13039	0.08282	0.99516	0.31829	1.10463	0.28499	0.05739	0.47426	0	0.03212	0.01643	0.09199	0.47007	11.5633	0.53784	1.23095	0.14166	0.06304	0.17195	0.63617	0.48983	0.00469	0.13133	0.01504	0.19961	0.10171	0.18604	0.06981	0.41558	0.86321	0.46817	0.38835	0.02934	0.44936	0.70455	1.03033
k__Bacteria|p__Firmicutes|c__Erysipelotrichia|o__Erysipelotrichales|f__Erysipelotrichaceae	0	0.10197	0.16085	0	4.43249	0.17875	0.76632	0	0.02947	0.10232	0.0903	0.08849	0.22236	0.13039	0.08282	0.99516	0.31829	1.10463	0.28499	0.05739	0.47426	0	0.03212	0.01643	0.09199	0.47007	11.5633	0.53784	1.23095	0.14166	0.06304	0.17195	0.63617	0.48983	0.00469	0.13133	0.01504	0.19961	0.10171	0.18604	0.06981	0.41558	0.86321	0.46817	0.38835	0.02934	0.44936	0.70455	1.03033
k__Bacteria|p__Firmicutes|c__Erysipelotrichia|o__Erysipelotrichales|f__Erysipelotrichaceae|g__Bulleidia	0	0.01804	0.13389	0	0.64656	0.17875	0.76632	0	0.00713	0.003	0.05713	0.03111	0.12344	0.05356	0.04775	0.02814	0.09826	0.12574	0.07051	0.04289	0.093	0	0.03077	0.00854	0.06092	0	0.08616	0.26748	0.36975	0.14166	0	0.13834	0.51049	0.38753	0	0.09326	0.00557	0.06851	0	0.14931	0	0.22347	0.51823	0.33409	0.27393	0.02934	0.44936	0.32206	0.48478
k__Bacteria|p__Firmicutes|c__Erysipelotrichia|o__Erysipelotrichales|f__Erysipelotrichaceae|g__Bulleidia|s__Bulleidia_extructa	0	0.01804	0.13389	0	0.64656	0.17875	0.76632	0	0.00713	0.003	0.05713	0.03111	0.12344	0.05356	0.04775	0.02814	0.09826	0.12574	0.07051	0.04289	0.093	0	0.03077	0.00854	0.06092	0	0.08616	0.26748	0.36975	0.14166	0	0.13834	0.51049	0.38753	0	0.09326	0.00557	0.06851	0	0.14931	0	0.22347	0.51823	0.33409	0.27393	0.02934	0.44936	0.32206	0.48478
k__Bacteria|p__Firmicutes|c__Erysipelotrichia|o__Erysipelotrichales|f__Erysipelotrichaceae|g__Eggerthia	0	0.05681	0.01846	0	3.50271	0	0	0	0	0	0	0	0	0	0	0.75653	0.20887	0.55962	0.05532	0	0.16157	0	0	0	0	0.47007	10.915	0.2107	0.67374	0	0.06304	0	0.04974	0	0	0	0	0	0	0	0	0.00653	0.1766	0	0	0	0	0	0.00239
k__Bacteria|p__Firmicutes|c__Erysipelotrichia|o__Erysipelotrichales|f__Erysipelotrichaceae|g__Eggerthia|s__Eggerthia_catenaformis	0	0.05681	0.01846	0	3.50271	0	0	0	0	0	0	0	0	0	0	0.75653	0.20887	0.55962	0.05532	0	0.16157	0	0	0	0	0.47007	10.915	0.2107	0.67374	0	0.06304	0	0.04974	0	0	0	0	0	0	0	0	0.00653	0.1766	0	0	0	0	0	0.00239
k__Bacteria|p__Firmicutes|c__Erysipelotrichia|o__Erysipelotrichales|f__Erysipelotrichaceae|g__Solobacterium	0	0.02712	0.00849	0	0.28322	0	0	0	0.02234	0.09931	0.03317	0.05738	0.09892	0.07682	0.03507	0.2105	0.01116	0.41928	0.15915	0.0145	0.2197	0	0.00135	0.00788	0.03107	0	0.56215	0.05966	0.18747	0	0	0.03361	0.07595	0.1023	0.00469	0.03807	0.00948	0.1311	0.10171	0.03674	0.06981	0.18558	0.16837	0.13409	0.11442	0	0	0.38248	0.54315
k__Bacteria|p__Firmicutes|c__Erysipelotrichia|o__Erysipelotrichales|f__Erysipelotrichaceae|g__Solobacterium|s__Solobacterium_moorei	0	0.02712	0.00849	0	0.28322	0	0	0	0.02234	0.09931	0.03317	0.05738	0.09892	0.07682	0.03507	0.2105	0.01116	0.41928	0.15915	0.0145	0.2197	0	0.00135	0.00788	0.03107	0	0.56215	0.05966	0.18747	0	0	0.03361	0.07595	0.1023	0.00469	0.03807	0.00948	0.1311	0.10171	0.03674	0.06981	0.18558	0.16837	0.13409	0.11442	0	0	0.38248	0.54315
k__Bacteria|p__Firmicutes|c__Limnochordia	0	0	0	0	0	0	0	0	0	0	0	0	0	0	0	0	0	0	0	0	0	0	0	0	0	0	0	0	0	0	0	0	0	0	0	0	0	0	0	0	0	0.0205	0	0.04885	0.04338	0.04123	0.00661	0.00607	0.00733
k__Bacteria|p__Firmicutes|c__Limnochordia|o__Limnochordales	0	0	0	0	0	0	0	0	0	0	0	0	0	0	0	0	0	0	0	0	0	0	0	0	0	0	0	0	0	0	0	0	0	0	0	0	0	0	0	0	0	0.0205	0	0.04885	0.04338	0.04123	0.00661	0.00607	0.00733
k__Bacteria|p__Firmicutes|c__Limnochordia|o__Limnochordales|f__Limnochordaceae	0	0	0	0	0	0	0	0	0	0	0	0	0	0	0	0	0	0	0	0	0	0	0	0	0	0	0	0	0	0	0	0	0	0	0	0	0	0	0	0	0	0.0205	0	0.04885	0.04338	0.04123	0.00661	0.00607	0.00733
k__Bacteria|p__Firmicutes|c__Limnochordia|o__Limnochordales|f__Limnochordaceae|g__Limnochorda	0	0	0	0	0	0	0	0	0	0	0	0	0	0	0	0	0	0	0	0	0	0	0	0	0	0	0	0	0	0	0	0	0	0	0	0	0	0	0	0	0	0.0205	0	0.04885	0.04338	0.04123	0.00661	0.00607	0.00733
k__Bacteria|p__Firmicutes|c__Limnochordia|o__Limnochordales|f__Limnochordaceae|g__Limnochorda|s__Limnochorda_pilosa	0	0	0	0	0	0	0	0	0	0	0	0	0	0	0	0	0	0	0	0	0	0	0	0	0	0	0	0	0	0	0	0	0	0	0	0	0	0	0	0	0	0.0205	0	0.04885	0.04338	0.04123	0.00661	0.00607	0.00733
k__Bacteria|p__Firmicutes|c__Negativicutes	2.92833	3.96477	3.06693	0.2935	4.57436	1.81668	2.83355	2.67288	2.03084	1.17113	9.21058	6.51964	2.58568	2.45641	4.81562	0.68033	1.1481	11.4757	8.80687	1.49072	5.1728	0	1.75159	4.24768	1.6024	0	1.09041	2.55454	6.53905	0	1.12929	10.9628	4.75727	6.29369	0.8446	2.12679	4.79442	8.08793	25.3162	16.2607	16.7018	9.67573	6.31268	7.1926	5.56942	0.45147	0.6392	10.1452	6.4678
k__Bacteria|p__Firmicutes|c__Negativicutes|o__Selenomonadales	0.48541	2.65635	0.56561	0	2.61536	0.31462	0	0	1.81738	1.0073	6.10643	4.959	2.09015	1.83414	1.73524	0.51381	0.90125	2.43175	2.56618	0.88246	2.88706	0	0.63291	2.156	1.21789	0	0.32083	0.60417	1.55796	0	0.47619	1.85876	1.79084	1.51014	0.50189	1.35058	0.83065	2.82617	3.46674	0.25542	0.74061	3.28941	3.47228	3.20216	2.03085	0.20432	0.46791	2.89277	2.09647
k__Bacteria|p__Firmicutes|c__Negativicutes|o__Selenomonadales|f__Selenomonadaceae	0.48541	2.65635	0.56561	0	2.61536	0.31462	0	0	1.81738	1.0073	6.10643	4.959	2.09015	1.83414	1.73524	0.51381	0.90125	2.43175	2.56618	0.88246	2.88706	0	0.63291	2.156	1.21789	0	0.32083	0.60417	1.55796	0	0.47619	1.85876	1.79084	1.51014	0.50189	1.35058	0.83065	2.82617	3.46674	0.25542	0.74061	3.28941	3.47228	3.20216	2.03085	0.20432	0.46791	2.89277	2.09647
k__Bacteria|p__Firmicutes|c__Negativicutes|o__Selenomonadales|f__Selenomonadaceae|g__Centipeda	0	0.26196	0.00119	0	0.04173	0	0	0	0	0.05475	0.14717	0.19871	0.1434	0.1477	0.02777	0.00333	0.01676	0.34531	0.09438	0.07571	0.59805	0	0.04954	0.02398	0.005	0	0	0.03035	0.04006	0	0	0	0.05995	0.07835	0.00121	0.01966	0.03103	0.19479	0	0	0.12754	0.01903	0.01769	0.13594	0.05797	0.00123	0	0.00162	0
k__Bacteria|p__Firmicutes|c__Negativicutes|o__Selenomonadales|f__Selenomonadaceae|g__Centipeda|s__Centipeda_periodontii	0	0.26196	0.00119	0	0.04173	0	0	0	0	0.05475	0.14717	0.19871	0.1434	0.1477	0.02777	0.00333	0.01676	0.34531	0.09438	0.07571	0.59805	0	0.04954	0.02398	0.005	0	0	0.03035	0.04006	0	0	0	0.05995	0.07835	0.00121	0.01966	0.03103	0.19479	0	0	0.12754	0.01903	0.01769	0.13594	0.05797	0.00123	0	0.00162	0
k__Bacteria|p__Firmicutes|c__Negativicutes|o__Selenomonadales|f__Selenomonadaceae|g__Mitsuokella	0	0	0	0	0	0	0	0	0	0	0	0	0	0	0	0	0	0.02315	0.00577	0	0	0	0.00409	1.02099	0	0	0	0	0	0	0	0	0	0.32669	0	0	0	0	0	0	0	0	0	0	0	0	0	0	0
k__Bacteria|p__Firmicutes|c__Negativicutes|o__Selenomonadales|f__Selenomonadaceae|g__Mitsuokella|s__Mitsuokella_sp_oral_taxon_131	0	0	0	0	0	0	0	0	0	0	0	0	0	0	0	0	0	0.02315	0.00577	0	0	0	0.00409	1.02099	0	0	0	0	0	0	0	0	0	0.32669	0	0	0	0	0	0	0	0	0	0	0	0	0	0	0
k__Bacteria|p__Firmicutes|c__Negativicutes|o__Selenomonadales|f__Selenomonadaceae|g__Selenomonas	0.48541	2.39439	0.56442	0	2.57363	0.31462	0	0	1.81738	0.95256	5.95926	4.76028	1.94675	1.68643	1.70746	0.51048	0.88449	2.0633	2.46603	0.80675	2.28901	0	0.57928	1.11103	1.2129	0	0.32083	0.57382	1.5179	0	0.47619	1.85876	1.73089	1.1051	0.50068	1.33092	0.79962	2.63138	3.46674	0.25542	0.61307	3.27038	3.45459	3.06621	1.97288	0.20309	0.46791	2.89115	2.09647
k__Bacteria|p__Firmicutes|c__Negativicutes|o__Selenomonadales|f__Selenomonadaceae|g__Selenomonas|s__Selenomonas_artemidis	0	0.0618	0	0	0	0	0	0	0	0	0.0329	0.03374	0	0	0.00251	0	0	0.00907	0.0083	0.0605	0.03663	0	0.0092	0.02018	0.00501	0	0	0	0	0	0	0.06914	0	0.0087	0	0	0.00143	0.02884	0.02412	0	0	0.03256	0.00231	0.00247	0.01774	0.01976	0.08599	0	0
k__Bacteria|p__Firmicutes|c__Negativicutes|o__Selenomonadales|f__Selenomonadaceae|g__Selenomonas|s__Selenomonas_flueggei	0	0.02949	0	0	0	0	0	0	0	0.00277	0.05707	0.05075	0.003	0.00166	0.01951	0.01313	0.03222	0.03941	0.11216	0.03696	0.02808	0	0.03989	0.04843	0	0	0.04336	0.00136	0.00519	0	0	0.06557	0.06973	0.1802	0	0	0.00146	0.0064	0	0	0.02582	0.01728	0.0448	0.05618	0.01562	0	0	0.05246	0.01485
k__Bacteria|p__Firmicutes|c__Negativicutes|o__Selenomonadales|f__Selenomonadaceae|g__Selenomonas|s__Selenomonas_infelix	0	0.04802	0.02025	0	0.06886	0	0	0	0.00718	0.04134	0.06623	0.07163	0.15041	0.08855	0.01726	0.01457	0.03185	0.01899	0.03628	0.0863	0.16933	0	0.01563	0.00099	0.02958	0	0.00946	0.00907	0.01265	0	0	0.08288	0.06049	0.00897	0	0.01655	0.05709	0.12942	0.00274	0	0	0.056	0.11374	0.17966	0.11315	0.01319	0.24207	0.02115	0.04655
k__Bacteria|p__Firmicutes|c__Negativicutes|o__Selenomonadales|f__Selenomonadaceae|g__Selenomonas|s__Selenomonas_noxia	0.32415	0.95042	0.12963	0	0.10358	0.0863	0	0	1.77007	0.82512	4.90322	4.21584	1.10351	1.0399	1.38153	0.03153	0.07234	0.52724	0.72951	0.0679	1.06428	0	0.36079	0.94856	1.03001	0	0	0.10974	0.14609	0	0.31196	0.45884	0.30052	0.16647	0.31726	0.76251	0.56798	1.0776	3.42747	0.25542	0.58724	0.20775	0.05811	1.14687	0.99993	0.0899	0.00558	1.90395	1.41452
k__Bacteria|p__Firmicutes|c__Negativicutes|o__Selenomonadales|f__Selenomonadaceae|g__Selenomonas|s__Selenomonas_sp_F0473	0	0	0	0	0	0	0	0	0	0	0	0	0	0	0	0	0	0	0	0	0	0	0	0	0	0	0	0	0	0	0	0	0	0	0	0	0	0	0	0	0	0.0017	0	0	0	0	0	0	0
k__Bacteria|p__Firmicutes|c__Negativicutes|o__Selenomonadales|f__Selenomonadaceae|g__Selenomonas|s__Selenomonas_sp_FOBRC6	0.16125	0.18117	0.0236	0	0.07638	0	0	0	0.00136	0.00641	0.06871	0.02161	0.15661	0.13033	0.01002	0.35557	0.24606	0.22133	0.39572	0.11205	0.06824	0	0.00665	0.00267	0.01665	0	0.03594	0.0529	0.06144	0	0	0.00681	0.06462	0.02948	0.10699	0.27152	0.02169	0.20272	0	0	0	1.11847	0.4213	0.40035	0.0614	0.03774	0.0148	0.60686	0.26629
k__Bacteria|p__Firmicutes|c__Negativicutes|o__Selenomonadales|f__Selenomonadaceae|g__Selenomonas|s__Selenomonas_sp_oral_taxon_126	0	0.18179	0.05596	0	0.18735	0.21171	0	0	0	0.00647	0.38575	0.05268	0.06665	0.02181	0.00205	0.00699	0.02371	0.07445	0.05921	0.07235	0.0982	0	0.01763	0.00454	0	0	0.00629	0.06424	0.04476	0	0	0.06474	0.23971	0.15772	0.01235	0.12522	0.00104	0.18849	0	0	0	0.19098	1.10582	0.08193	0.05693	0.00199	0	0.02018	0.07485
k__Bacteria|p__Firmicutes|c__Negativicutes|o__Selenomonadales|f__Selenomonadaceae|g__Selenomonas|s__Selenomonas_sp_oral_taxon_138	0	0.1346	0.02278	0	0.09946	0	0	0	0	0.00373	0.02523	0.01174	0.03151	0.02896	0.00671	0.03192	0.04192	0.08864	0.12371	0.04376	0.04739	0	0.00498	0.0011	0	0	0.00522	0.02682	0.02818	0	0	0.00224	0.08535	0.03584	0.00935	0.03036	0.00666	0.04176	0	0	0	0.14876	0.21672	0.15696	0.05542	0.00519	0.04221	0.11644	0.08729
k__Bacteria|p__Firmicutes|c__Negativicutes|o__Selenomonadales|f__Selenomonadaceae|g__Selenomonas|s__Selenomonas_sp_oral_taxon_892	0	0.05045	0.04725	0	0.02345	0	0	0	0	0	0.01646	0	0.00699	0.00367	0.01098	0.01135	0.18033	0.04754	0.08511	0.03663	0.0483	0	0.00228	0	0.03836	0	0.00443	0.00762	0.01701	0	0	0	0.00737	0	0.02858	0.07149	0.00801	0.31686	0	0	0	1.11195	0.29946	0.17079	0.21764	0.00315	0.0173	0.02066	0.02056
k__Bacteria|p__Firmicutes|c__Negativicutes|o__Selenomonadales|f__Selenomonadaceae|g__Selenomonas|s__Selenomonas_sp_oral_taxon_920	0	0.2832	0.03046	0	0.13558	0	0	0	0.0171	0.02658	0.21392	0.08735	0.30555	0.25082	0.14945	0.01366	0.06643	0.10757	0.16679	0.10567	0.21026	0	0.01874	0.00758	0.03148	0	0.00283	0.02593	0.02881	0	0	0.0072	0.0369	0.00531	0.02615	0.03938	0.06247	0.19049	0	0	0	0.24003	0.18758	0.37882	0.16876	0.02681	0.01543	0.05465	0.06335
k__Bacteria|p__Firmicutes|c__Negativicutes|o__Selenomonadales|f__Selenomonadaceae|g__Selenomonas|s__Selenomonas_sputigena	0	0.47346	0.23449	0	1.87896	0.01662	0	0	0.02169	0.04014	0.18977	0.21495	0.12253	0.12074	0.10744	0.03176	0.18963	0.92905	0.74924	0.18462	0.5183	0	0.10348	0.07697	0.06181	0	0.2133	0.27616	1.17375	0	0.16422	1.10134	0.8662	0.51243	0	0.01388	0.07179	0.44879	0.01241	0	0	0.14489	1.00475	0.49218	0.26628	0.00537	0.04453	0.09479	0.10821
k__Bacteria|p__Firmicutes|c__Negativicutes|o__Veillonellales	2.44293	1.30842	2.50132	0.2935	1.959	1.50205	2.83355	2.67288	0.21346	0.16383	3.10415	1.56064	0.49553	0.62227	3.08039	0.16652	0.24685	9.04392	6.24069	0.60826	2.28574	0	1.11867	2.09168	0.3845	0	0.76959	1.95037	4.98109	0	0.65311	9.10407	2.96643	4.78355	0.34271	0.77621	3.96377	5.26176	21.8495	16.0053	15.9612	6.38633	2.8404	3.99044	3.53857	0.24715	0.17129	7.25239	4.37133
k__Bacteria|p__Firmicutes|c__Negativicutes|o__Veillonellales|f__Veillonellaceae	2.44293	1.30842	2.50132	0.2935	1.959	1.50205	2.83355	2.67288	0.21346	0.16383	3.10415	1.56064	0.49553	0.62227	3.08039	0.16652	0.24685	9.04392	6.24069	0.60826	2.28574	0	1.11867	2.09168	0.3845	0	0.76959	1.95037	4.98109	0	0.65311	9.10407	2.96643	4.78355	0.34271	0.77621	3.96377	5.26176	21.8495	16.0053	15.9612	6.38633	2.8404	3.99044	3.53857	0.24715	0.17129	7.25239	4.37133
k__Bacteria|p__Firmicutes|c__Negativicutes|o__Veillonellales|f__Veillonellaceae|g__Anaeroglobus	0	0.07327	1.74642	0	0.50183	1.27877	0.86728	0	0	0	0.29635	0.23919	0	0	0	0.00434	0.02668	1.79513	0.80215	0.1253	0.49982	0	0.06698	0.1253	0	0	0.0569	0.71385	3.25485	0	0	2.4488	0.40253	1.91122	0.03024	0.16559	0	0.00597	0	0.17866	0	0.22662	0.22829	0.12094	0.01804	0	0	0.04311	0.00718
k__Bacteria|p__Firmicutes|c__Negativicutes|o__Veillonellales|f__Veillonellaceae|g__Anaeroglobus|s__Anaeroglobus_geminatus	0	0.07327	1.74642	0	0.50183	1.27877	0.86728	0	0	0	0.29635	0.23919	0	0	0	0.00434	0.02668	1.79513	0.80215	0.1253	0.49982	0	0.06698	0.1253	0	0	0.0569	0.71385	3.25485	0	0	2.4488	0.40253	1.91122	0.03024	0.16559	0	0.00597	0	0.17866	0	0.22662	0.22829	0.12094	0.01804	0	0	0.04311	0.00718
k__Bacteria|p__Firmicutes|c__Negativicutes|o__Veillonellales|f__Veillonellaceae|g__Dialister	0	0.01532	0.59388	0	1.29821	0	0	0	0.02328	0.01007	0.84385	0.27405	0.39744	0.16713	0.05669	0.01051	0.21637	0.24112	0.2246	0.04573	0.5082	0	0.05578	0.04645	0	0	0.35443	0.10907	0.78965	0	0	0.21542	0.68072	0.57608	0.06625	0.26355	0.00973	0.1069	0	0.10066	0	0.11039	0.19762	0.04507	0.13142	0	0.00378	0.16195	0.41662
k__Bacteria|p__Firmicutes|c__Negativicutes|o__Veillonellales|f__Veillonellaceae|g__Dialister|s__Dialister_invisus	0	0.00612	0.46943	0	0.49856	0	0	0	0.02328	0.00555	0.16711	0.10682	0.08236	0.04367	0.00894	0	0	0.22223	0.16702	0.01521	0.13715	0	0.02605	0.03914	0	0	0.00458	0.07146	0.31655	0	0	0.10172	0.09097	0.39901	0.06625	0.26355	0.00973	0.03411	0	0.10066	0	0.11039	0.11039	0.02912	0.02519	0	0.00378	0.07644	0.12598
k__Bacteria|p__Firmicutes|c__Negativicutes|o__Veillonellales|f__Veillonellaceae|g__Dialister|s__Dialister_pneumosintes	0	0.0092	0.12446	0	0.79966	0	0	0	0	0.00452	0.67675	0.16723	0.31508	0.12345	0.04775	0.01051	0.21637	0.01888	0.05757	0.03052	0.37105	0	0.02973	0.00731	0	0	0.34985	0.0376	0.4731	0	0	0.1137	0.58975	0.17707	0	0	0	0.07279	0	0	0	0	0.08723	0.01594	0.10623	0	0	0.08551	0.29064
k__Bacteria|p__Firmicutes|c__Negativicutes|o__Veillonellales|f__Veillonellaceae|g__Megasphaera	0	0.00517	0	0	0	0	0	0	0	0.00081	0.06916	0.04357	0	0	0	0	0	1.68658	0.56374	0.03256	0.03893	0	0.1073	0.07357	0	0	0	0.08912	0.02487	0	0	1.14824	0.06384	0.12181	0	0	0	0	0.04784	0	0	0	0	0	0	0	0	0.18254	0.00252
k__Bacteria|p__Firmicutes|c__Negativicutes|o__Veillonellales|f__Veillonellaceae|g__Megasphaera|s__Megasphaera_micronuciformis	0	0.00517	0	0	0	0	0	0	0	0.00081	0.06916	0.04357	0	0	0	0	0	1.68658	0.56374	0.03256	0.03893	0	0.1073	0.07357	0	0	0	0.08912	0.02487	0	0	1.14824	0.06384	0.12181	0	0	0	0	0.04784	0	0	0	0	0	0	0	0	0.18254	0.00252
k__Bacteria|p__Firmicutes|c__Negativicutes|o__Veillonellales|f__Veillonellaceae|g__Veillonella	2.44293	1.21466	0.16102	0.2935	0.15896	0.22328	1.96627	2.67288	0.19018	0.15295	1.89478	1.00383	0.0981	0.45514	3.0237	0.15166	0.00379	5.32109	4.65021	0.40467	1.23878	0	0.88862	1.84636	0.3845	0	0.35826	1.03833	0.91172	0	0.65311	5.29161	1.81934	2.17444	0.24622	0.34707	3.95404	5.14889	21.8017	15.7259	15.9612	6.04932	2.41448	3.82443	3.38911	0.24715	0.16751	6.8648	3.94502
k__Bacteria|p__Firmicutes|c__Negativicutes|o__Veillonellales|f__Veillonellaceae|g__Veillonella|s__Veillonella_atypica	0	0.01444	0	0	0	0	0	0	0	0	0	0.01032	0.00454	0.05908	0	0	0	0.42868	0.10279	0	0.02358	0	0.03839	0.12849	0	0	0	0.02444	0.01303	0	0	0	0.03169	0	0	0	0	0	0	0	1.31576	0.00636	0	0.33655	0.33789	0	0	0.03242	0.02734
k__Bacteria|p__Firmicutes|c__Negativicutes|o__Veillonellales|f__Veillonellaceae|g__Veillonella|s__Veillonella_dispar	0	0	0	0	0	0	0	0	0	0	0.00523	0	0	0	0	0.06238	0	0.00312	0.00506	0	0	0	0	0	0	0	0.19249	0	0	0	0	0	0	0	0	0	0.00672	0.00871	0	0	0	0.00422	0	0.00724	0.00472	0.00281	0	0.21342	0.0868
k__Bacteria|p__Firmicutes|c__Negativicutes|o__Veillonellales|f__Veillonellaceae|g__Veillonella|s__Veillonella_infantium	0	0.00309	0	0	0	0	0	0	0	0	0.00465	0	0	0	0	0.07655	0.00267	0.00394	0.00903	0	0.00716	0	0	0	0	0	0.15642	0	0	0	0	0	0	0	0	0	0.00294	0	0	0	0	0	0	0.00087	0	0.00065	0	0.08027	0.03315
k__Bacteria|p__Firmicutes|c__Negativicutes|o__Veillonellales|f__Veillonellaceae|g__Veillonella|s__Veillonella_parvula	2.44293	1.19713	0.16102	0.2935	0.15896	0.22328	1.96627	2.67288	0.19018	0.15295	1.8849	0.99351	0.09355	0.39606	3.0237	0.01067	0.00112	4.86668	4.52119	0.40467	1.20805	0	0.85023	1.71787	0.3845	0	0	1.01389	0.89869	0	0.65311	5.29161	1.78765	2.17444	0.24622	0.34707	3.94158	5.13655	21.8017	15.7145	14.6186	6.03874	2.41448	3.47976	3.04651	0.24303	0.16751	6.41971	3.76107
k__Bacteria|p__Firmicutes|c__Negativicutes|o__Veillonellales|f__Veillonellaceae|g__Veillonella|s__Veillonella_rodentium	0	0	0	0	0	0	0	0	0	0	0	0	0	0	0	0	0	0	0	0	0	0	0	0	0	0	0	0	0	0	0	0	0	0	0	0	0	0	0	0.01143	0	0	0	0	0	0	0	0	0
k__Bacteria|p__Firmicutes|c__Negativicutes|o__Veillonellales|f__Veillonellaceae|g__Veillonella|s__Veillonella_rogosae	0	0	0	0	0	0	0	0	0	0	0	0	0	0	0	0	0	0	0	0	0	0	0	0	0	0	0	0	0	0	0	0	0	0	0	0	0.0028	0.00363	0	0	0	0	0	0	0	0	0	0.02121	0.00642
k__Bacteria|p__Firmicutes|c__Negativicutes|o__Veillonellales|f__Veillonellaceae|g__Veillonella|s__Veillonella_sp_T11011_6	0	0	0	0	0	0	0	0	0	0	0	0	0	0	0	0.00206	0	0	0.00393	0	0	0	0	0	0	0	0.00936	0	0	0	0	0	0	0	0	0	0	0	0	0	0.02691	0	0	0	0	0.00066	0	0.09273	0.03025
k__Bacteria|p__Firmicutes|c__Negativicutes|o__Veillonellales|f__Veillonellaceae|g__Veillonella|s__Veillonella_tobetsuensis	0	0	0	0	0	0	0	0	0	0	0	0	0	0	0	0	0	0.01868	0.00822	0	0	0	0	0	0	0	0	0	0	0	0	0	0	0	0	0	0	0	0	0	0	0	0	0	0	0	0	0.00504	0
k__Bacteria|p__Firmicutes|c__Tissierellia	0	0	0.18895	0	0.04257	0.02996	0.89531	0	0.00253	0.1513	0.44968	0.03245	0.24382	0.05818	0.01569	0.0484	0.08936	0.08764	0.22186	0.01527	0.09481	0	0.02005	0.01276	0.00681	0	0.04954	1.39207	2.78837	0.90401	0	0.19291	0.72543	0.16759	0.10658	0.10479	0.09394	0.26823	0.1042	0.08644	0.19	0.01663	0.84766	0.00968	0.00781	0.01005	0.2902	0.13444	0.26872
k__Bacteria|p__Firmicutes|c__Tissierellia|o__Tissierellales	0	0	0.18895	0	0.04257	0.02996	0.89531	0	0.00253	0.1513	0.44968	0.03245	0.24382	0.05818	0.01569	0.0484	0.08936	0.08764	0.22186	0.01527	0.09481	0	0.02005	0.01276	0.00681	0	0.04954	1.39207	2.78837	0.90401	0	0.19291	0.72543	0.16759	0.10658	0.10479	0.09394	0.26823	0.1042	0.08644	0.19	0.01663	0.84766	0.00968	0.00781	0.01005	0.2902	0.13444	0.26872
k__Bacteria|p__Firmicutes|c__Tissierellia|o__Tissierellales|f__Peptoniphilaceae	0	0	0.18895	0	0.04257	0.02996	0.89531	0	0.00253	0.1513	0.44968	0.03245	0.24382	0.05818	0.01569	0.0484	0.08936	0.08764	0.22186	0.01527	0.09481	0	0.02005	0.01276	0.00681	0	0.04954	1.39207	2.78837	0.90401	0	0.19291	0.72543	0.16759	0.10658	0.10479	0.09394	0.26823	0.1042	0.08644	0.19	0.01663	0.84766	0.00968	0.00781	0.01005	0.2902	0.13444	0.26872
k__Bacteria|p__Firmicutes|c__Tissierellia|o__Tissierellales|f__Peptoniphilaceae|g__Parvimonas	0	0	0.18895	0	0.04257	0.02996	0.89531	0	0.00253	0.1513	0.44968	0.03245	0.24382	0.05818	0.01569	0.0484	0.08936	0.08764	0.22186	0.01527	0.09481	0	0.02005	0.01276	0.00681	0	0.04954	1.39207	2.78837	0.90401	0	0.19291	0.72543	0.16759	0.10658	0.10479	0.09394	0.26823	0.1042	0.08644	0.19	0.01663	0.84766	0.00968	0.00781	0.01005	0.2902	0.13444	0.26872
k__Bacteria|p__Firmicutes|c__Tissierellia|o__Tissierellales|f__Peptoniphilaceae|g__Parvimonas|s__Parvimonas_micra	0	0	0.18895	0	0.04257	0.02996	0.89531	0	0.00253	0.1513	0.44968	0.03245	0.23814	0.05818	0.01569	0.02123	0.05672	0.07453	0.2167	0.01415	0.02958	0	0.02005	0.01276	0.00681	0	0.04286	1.29436	2.78686	0.90401	0	0.19291	0.72543	0.16759	0.10658	0.10479	0.09394	0.26823	0.02848	0.08644	0.19	0.00978	0.66406	0.00968	0.00781	0.01005	0.2902	0.12584	0.19717
k__Bacteria|p__Firmicutes|c__Tissierellia|o__Tissierellales|f__Peptoniphilaceae|g__Parvimonas|s__Parvimonas_sp_oral_taxon_110	0	0	0	0	0	0	0	0	0	0	0	0	0	0	0	0	0	0	0	0	0.06523	0	0	0	0	0	0	0	0	0	0	0	0	0	0	0	0	0	0.07572	0	0	0	0.02208	0	0	0	0	0	0
k__Bacteria|p__Firmicutes|c__Tissierellia|o__Tissierellales|f__Peptoniphilaceae|g__Parvimonas|s__Parvimonas_sp_oral_taxon_393	0	0	0	0	0	0	0	0	0	0	0	0	0.00568	0	0	0.02717	0.03264	0.01312	0.00516	0.00112	0	0	0	0	0	0	0.00669	0.09771	0.00151	0	0	0	0	0	0	0	0	0	0	0	0	0.00685	0.16153	0	0	0	0	0.00859	0.07154
k__Bacteria|p__Fusobacteria	0.30084	9.60946	2.09632	0	1.40461	1.18608	3.94813	1.9858	3.46594	2.10406	5.44628	3.38836	5.50749	4.52097	3.42284	0.74906	1.42187	2.80243	4.01717	0.67141	3.18212	0.32166	0.56672	0.56783	3.56272	4.12989	0.17693	1.79854	1.50309	0.23886	2.53186	1.17173	1.02167	0.55851	2.85458	2.3015	2.48247	3.92444	4.49398	3.47473	3.80719	2.77384	2.2552	11.0078	8.32311	0.29073	0.5514	6.57138	5.51425
k__Bacteria|p__Fusobacteria|c__Fusobacteriia	0.30084	9.60946	2.09632	0	1.40461	1.18608	3.94813	1.9858	3.46594	2.10406	5.44628	3.38836	5.50749	4.52097	3.42284	0.74906	1.42187	2.80243	4.01717	0.67141	3.18212	0.32166	0.56672	0.56783	3.56272	4.12989	0.17693	1.79854	1.50309	0.23886	2.53186	1.17173	1.02167	0.55851	2.85458	2.3015	2.48247	3.92444	4.49398	3.47473	3.80719	2.77384	2.2552	11.0078	8.32311	0.29073	0.5514	6.57138	5.51425
k__Bacteria|p__Fusobacteria|c__Fusobacteriia|o__Fusobacteriales	0.30084	9.60946	2.09632	0	1.40461	1.18608	3.94813	1.9858	3.46594	2.10406	5.44628	3.38836	5.50749	4.52097	3.42284	0.74906	1.42187	2.80243	4.01717	0.67141	3.18212	0.32166	0.56672	0.56783	3.56272	4.12989	0.17693	1.79854	1.50309	0.23886	2.53186	1.17173	1.02167	0.55851	2.85458	2.3015	2.48247	3.92444	4.49398	3.47473	3.80719	2.77384	2.2552	11.0078	8.32311	0.29073	0.5514	6.57138	5.51425
k__Bacteria|p__Fusobacteria|c__Fusobacteriia|o__Fusobacteriales|f__Fusobacteriaceae	0.16646	1.60005	1.1453	0	0.71293	0.81536	3.94813	1.9858	1.03951	0.67164	1.54907	0.74628	2.03156	1.1482	0.64116	0.25783	0.56481	0.83199	1.30703	0.39559	1.50059	0	0.16144	0.06793	0.91056	0.48123	0.17245	1.59632	1.24104	0.23886	1.92968	0.77454	0.88296	0.45472	0.95114	0.79906	0.95663	1.74047	0.6298	1.78273	1.07834	0.48872	1.79216	1.28392	1.23798	0.0519	0.42376	0.93842	0.89641
k__Bacteria|p__Fusobacteria|c__Fusobacteriia|o__Fusobacteriales|f__Fusobacteriaceae|g__Fusobacterium	0.16646	1.60005	1.1453	0	0.71293	0.81536	3.94813	1.9858	1.03951	0.67164	1.54907	0.74628	2.03156	1.1482	0.64116	0.25783	0.56481	0.83199	1.30703	0.39559	1.50059	0	0.16144	0.06793	0.91056	0.48123	0.17245	1.59632	1.24104	0.23886	1.92968	0.77454	0.88296	0.45472	0.95114	0.79906	0.95663	1.74047	0.6298	1.78273	1.07834	0.48872	1.79216	1.28392	1.23798	0.0519	0.42376	0.93842	0.89641
k__Bacteria|p__Fusobacteria|c__Fusobacteriia|o__Fusobacteriales|f__Fusobacteriaceae|g__Fusobacterium|s__Fusobacterium_hwasookii	0	0.0748	0.12717	0	0	0	0	0	0	0	0	0	0.01688	0.02861	0.04996	0.01134	0.11702	0.02149	0.08942	0.02333	0.05087	0	0	0	0.24119	0	0	0	0	0	0	0	0	0	0.42178	0.0561	0.19389	0.3982	0	0	0	0	0.07743	0.20267	0.15433	0.02067	0	0	0
k__Bacteria|p__Fusobacteria|c__Fusobacteriia|o__Fusobacteriales|f__Fusobacteriaceae|g__Fusobacterium|s__Fusobacterium_nucleatum	0.16646	1.03065	0.96441	0	0.71293	0.81536	3.94813	1.9858	0.84406	0.62281	1.49206	0.67862	1.99914	1.07957	0.39779	0.24649	0.44153	0.74868	0.86414	0.32687	1.24222	0	0.16144	0.06793	0.61379	0.48123	0.17245	1.59024	1.22406	0.23886	1.92968	0.77454	0.8339	0.45472	0.36389	0.57476	0.62932	1.09248	0.55339	1.5916	1.07834	0.37092	1.57778	0.87849	0.96501	0.03123	0.34573	0.53419	0.53003
k__Bacteria|p__Fusobacteria|c__Fusobacteriia|o__Fusobacteriales|f__Fusobacteriaceae|g__Fusobacterium|s__Fusobacterium_periodonticum	0	0.49459	0.02183	0	0	0	0	0	0.19545	0.04883	0.05702	0.06766	0.01555	0.04002	0.19341	0	0.00626	0.06182	0.35148	0.04539	0.2075	0	0	0	0.05558	0	0	0.00608	0.01698	0	0	0	0	0	0.13032	0.16327	0.13342	0.24979	0.07641	0.19113	0	0.10438	0.11167	0.1765	0.09213	0	0.07803	0.40423	0.36637
k__Bacteria|p__Fusobacteria|c__Fusobacteriia|o__Fusobacteriales|f__Fusobacteriaceae|g__Fusobacterium|s__Fusobacterium_sp_oral_taxon_370	0	0	0.03189	0	0	0	0	0	0	0	0	0	0	0	0	0	0	0	0.00198	0	0	0	0	0	0	0	0	0	0	0	0	0	0.04906	0	0.03516	0.00493	0	0	0	0	0	0.01342	0.02527	0.02625	0.0265	0	0	0	0
k__Bacteria|p__Fusobacteria|c__Fusobacteriia|o__Fusobacteriales|f__Leptotrichiaceae	0.13438	8.00942	0.95102	0	0.69168	0.37072	0	0	2.42643	1.43242	3.8972	2.64208	3.47593	3.37276	2.78168	0.49124	0.85707	1.97044	2.71014	0.27583	1.68153	0.32166	0.40529	0.49989	2.65216	3.64866	0.00448	0.20222	0.26205	0	0.60218	0.39719	0.13871	0.10379	1.90344	1.50244	1.52585	2.18396	3.86418	1.692	2.72884	2.28512	0.46305	9.72389	7.08513	0.23883	0.12764	5.63295	4.61784
k__Bacteria|p__Fusobacteria|c__Fusobacteriia|o__Fusobacteriales|f__Leptotrichiaceae|g__Leptotrichia	0.13438	8.00942	0.95102	0	0.69168	0.37072	0	0	2.42643	1.43242	3.8972	2.64208	3.47593	3.37276	2.78168	0.49124	0.85707	1.97044	2.71014	0.27583	1.68153	0.32166	0.40529	0.49989	2.65216	3.64866	0.00448	0.20222	0.26205	0	0.60218	0.39719	0.13871	0.10379	1.90344	1.50244	1.52585	2.18396	3.86418	1.692	2.72884	2.28512	0.46305	9.72389	7.08513	0.23883	0.12764	5.63295	4.61784
k__Bacteria|p__Fusobacteria|c__Fusobacteriia|o__Fusobacteriales|f__Leptotrichiaceae|g__Leptotrichia|s__Leptotrichia_buccalis	0	1.99982	0.08284	0	0.12887	0	0	0	0.12553	0.12955	0.30701	0.28452	0.59334	0.52666	0.62322	0.01502	0.15059	0.12423	0.42456	0.01274	0.49929	0.32166	0.03118	0.02592	0.70059	2.60769	0	0.02546	0.03293	0	0.29897	0	0	0	0.63191	0.73692	0.37383	0.44922	0	0	0.33279	0.49417	0.06028	2.88965	2.03249	0.00588	0	1.17053	1.27583
k__Bacteria|p__Fusobacteria|c__Fusobacteriia|o__Fusobacteriales|f__Leptotrichiaceae|g__Leptotrichia|s__Leptotrichia_goodfellowii	0	0	0.0109	0	0	0	0	0	0	0	0.02165	0.01099	0.02821	0.00259	0.02758	0	0	0	0	0	0	0	0	0	0.00342	0	0	0	0	0	0	0	0	0	0	0	0	0	0	0.23042	0.03457	0	0.1033	0	0.0215	0	0	0.00107	0.09112
k__Bacteria|p__Fusobacteria|c__Fusobacteriia|o__Fusobacteriales|f__Leptotrichiaceae|g__Leptotrichia|s__Leptotrichia_hofstadii	0.13438	1.33932	0.4553	0	0.04805	0.37072	0	0	1.47055	0.80697	1.82675	1.37931	0.41965	0.44541	0.8933	0.01548	0.18373	0.29152	0.40339	0.05349	0.30013	0	0.11483	0.04759	0.8642	1.04098	0	0.05174	0.04012	0	0.30321	0	0.05629	0	0.34887	0.34966	0.57764	0.51851	0.74574	0.72567	1.05243	0.43808	0.08374	1.89011	2.06426	0.0254	0.02477	1.5182	1.32611
k__Bacteria|p__Fusobacteria|c__Fusobacteriia|o__Fusobacteriales|f__Leptotrichiaceae|g__Leptotrichia|s__Leptotrichia_sp_oral_taxon_212	0	0.77252	0.10715	0	0	0	0	0	0.24779	0.20171	0.09714	0.03826	0.10489	0.10052	0.09368	0.03284	0.10859	0.07344	0.21926	0.03758	0.13635	0	0.01982	0.0023	0.39976	0	0	0.00433	0.02358	0	0	0	0	0	0.82172	0.26608	0.28355	0.23409	0.04638	0.07816	0.12207	0.16444	0.0396	0.21519	0.16472	0.17092	0.0918	0.03625	0.01057
k__Bacteria|p__Fusobacteria|c__Fusobacteriia|o__Fusobacteriales|f__Leptotrichiaceae|g__Leptotrichia|s__Leptotrichia_sp_oral_taxon_215	0	0.18708	0.00793	0	0	0	0	0	0.12944	0.03809	0.08804	0.02858	0.01188	0.00938	0.03983	0.42422	0.29529	0.06414	0.05872	0.02486	0.02831	0	0.00112	0	0.00712	0	0.00448	0.00046	0	0	0	0	0	0	0.01188	0.02893	0.02803	0.03197	1.31785	0.06987	0	0.42426	0.05688	0.10305	0.06354	0.01126	0.01107	0.23833	0.20586
k__Bacteria|p__Fusobacteria|c__Fusobacteriia|o__Fusobacteriales|f__Leptotrichiaceae|g__Leptotrichia|s__Leptotrichia_sp_oral_taxon_225	0	0.58461	0.09489	0	0.01108	0	0	0	0.21117	0.10949	0.07492	0.05478	0.06997	0.04743	0.12282	0.00367	0.07331	0.05822	0.07498	0.02238	0.04026	0	0.02457	0.00897	0.18814	0	0	0.00251	0.00597	0	0	0	0	0	0.06309	0.05399	0.11951	0.22169	0.29709	0.24155	0.0485	0.14589	0.01441	0.44207	0.354	0.00363	0	0.37462	0.42876
k__Bacteria|p__Fusobacteria|c__Fusobacteriia|o__Fusobacteriales|f__Leptotrichiaceae|g__Leptotrichia|s__Leptotrichia_sp_oral_taxon_498	0	0.37243	0	0	0.07681	0	0	0	0.00039	0	0.08469	0.06619	1.65349	1.38354	0.45085	0	0.00082	0.45126	0.61273	0.07503	0.29388	0	0.06603	0.184	0.12072	0	0	0.03668	0.05346	0	0	0	0.01752	0.0241	0	0.01876	0.03198	0.0752	0	0.07741	0.278	0.07272	0.01527	2.41783	1.29918	0.00177	0	0.01108	0.00806
k__Bacteria|p__Fusobacteria|c__Fusobacteriia|o__Fusobacteriales|f__Leptotrichiaceae|g__Leptotrichia|s__Leptotrichia_sp_oral_taxon_847	0	0.02735	0	0	0	0	0	0	0	0	0	0	0.00301	0.00089	0.00237	0	0	0.05082	0.02094	0	0.03602	0	0	0.00057	0	0	0	0	0	0	0	0	0	0	0	0	0	0	0	0	0	0.00248	0	0.21218	0.09526	0	0	0.00284	0
k__Bacteria|p__Fusobacteria|c__Fusobacteriia|o__Fusobacteriales|f__Leptotrichiaceae|g__Leptotrichia|s__Leptotrichia_sp_oral_taxon_879	0	0.29593	0.03863	0	0.00958	0	0	0	0.1655	0.08161	0.19671	0.09718	0.04996	0.0586	0.08017	0	0.0241	0.06347	0.07224	0.0086	0.06011	0	0.03221	0.01456	0.0624	0	0	0.00495	0.00618	0	0	0	0	0	0.01882	0.03083	0.03428	0.04143	0.42798	0.05174	0.11423	0.05135	0.00935	0.3718	0.30103	0.0045	0	0.21413	0.18249
k__Bacteria|p__Fusobacteria|c__Fusobacteriia|o__Fusobacteriales|f__Leptotrichiaceae|g__Leptotrichia|s__Leptotrichia_wadei	0	2.43035	0.15338	0	0.4173	0	0	0	0.07608	0.065	1.2003	0.68228	0.54153	0.79774	0.44786	0	0.02065	0.79335	0.82334	0.04114	0.28719	0	0.11552	0.21598	0.3058	0	0	0.07607	0.0998	0	0	0.39719	0.0649	0.07969	0.00715	0.01727	0.07702	0.61184	1.02914	0.21719	0.74626	0.49173	0.08021	1.18201	0.68914	0.01547	0	2.0659	1.08905
k__Bacteria|p__Planctomycetes	0	0	0	0	0	0	0	0	0	0	0	0	0	0	0	0	0	0	0	0	0	0	0	0	0	0	0	0	0	0	0	0	0	0	0	0	0	0	0	0	0	0.00252	0	0.00378	0.00355	0.01004	0.00317	0.00158	0.00051
k__Bacteria|p__Planctomycetes|c__Planctomycetia	0	0	0	0	0	0	0	0	0	0	0	0	0	0	0	0	0	0	0	0	0	0	0	0	0	0	0	0	0	0	0	0	0	0	0	0	0	0	0	0	0	0.00252	0	0.00378	0.00355	0.01004	0.00317	0.00158	0.00051
k__Bacteria|p__Planctomycetes|c__Planctomycetia|o__Planctomycetales	0	0	0	0	0	0	0	0	0	0	0	0	0	0	0	0	0	0	0	0	0	0	0	0	0	0	0	0	0	0	0	0	0	0	0	0	0	0	0	0	0	0.00252	0	0.00378	0.00355	0.01004	0.00317	0.00158	0.00051
k__Bacteria|p__Planctomycetes|c__Planctomycetia|o__Planctomycetales|f__Gemmataceae	0	0	0	0	0	0	0	0	0	0	0	0	0	0	0	0	0	0	0	0	0	0	0	0	0	0	0	0	0	0	0	0	0	0	0	0	0	0	0	0	0	0	0	0	0.00125	0	0	0	0
k__Bacteria|p__Planctomycetes|c__Planctomycetia|o__Planctomycetales|f__Gemmataceae|g__Gemmata	0	0	0	0	0	0	0	0	0	0	0	0	0	0	0	0	0	0	0	0	0	0	0	0	0	0	0	0	0	0	0	0	0	0	0	0	0	0	0	0	0	0	0	0	0.00125	0	0	0	0
k__Bacteria|p__Planctomycetes|c__Planctomycetia|o__Planctomycetales|f__Gemmataceae|g__Gemmata|s__Gemmata_obscuriglobus	0	0	0	0	0	0	0	0	0	0	0	0	0	0	0	0	0	0	0	0	0	0	0	0	0	0	0	0	0	0	0	0	0	0	0	0	0	0	0	0	0	0	0	0	0.00125	0	0	0	0
k__Bacteria|p__Planctomycetes|c__Planctomycetia|o__Planctomycetales|f__Isosphaeraceae	0	0	0	0	0	0	0	0	0	0	0	0	0	0	0	0	0	0	0	0	0	0	0	0	0	0	0	0	0	0	0	0	0	0	0	0	0	0	0	0	0	0.00252	0	0.00378	0.0023	0.01004	0.00317	0.00158	0.00051
k__Bacteria|p__Planctomycetes|c__Planctomycetia|o__Planctomycetales|f__Isosphaeraceae|g__Paludisphaera	0	0	0	0	0	0	0	0	0	0	0	0	0	0	0	0	0	0	0	0	0	0	0	0	0	0	0	0	0	0	0	0	0	0	0	0	0	0	0	0	0	0.00252	0	0.00378	0.0023	0.01004	0.00317	0.00158	0.00051
k__Bacteria|p__Planctomycetes|c__Planctomycetia|o__Planctomycetales|f__Isosphaeraceae|g__Paludisphaera|s__Paludisphaera_borealis	0	0	0	0	0	0	0	0	0	0	0	0	0	0	0	0	0	0	0	0	0	0	0	0	0	0	0	0	0	0	0	0	0	0	0	0	0	0	0	0	0	0.00252	0	0.00378	0.0023	0.01004	0.00317	0.00158	0.00051
k__Bacteria|p__Proteobacteria	43.2511	31.5023	16.1685	27.0683	2.49176	16.0957	9.51984	39.0003	12.3509	13.8006	6.65933	7.83302	16.9527	27.6026	18.8655	36.9392	30.6986	21.6127	36.0272	39.3627	28.5913	26.0634	31.1305	11.1383	26.9807	16.5896	3.97454	14.4235	7.2002	25.1492	28.7731	8.06531	17.3714	11.1789	45.8109	21.5701	21.2285	12.5277	5.74018	16.0632	9.86005	22.7311	6.33995	24.6652	25.3849	27.7469	14.6328	26.0446	20.2343
k__Bacteria|p__Proteobacteria|c__Betaproteobacteria	30.4969	25.6297	12.587	24.1273	1.42646	10.751	0.04783	34.7409	2.96884	4.76747	2.72378	2.09523	9.5692	20.2346	14.034	26.5917	21.3183	15.985	20.666	32.0557	22.0591	21.8629	25.7333	9.57286	20.0827	12.2104	1.73587	6.32255	3.71943	16.9922	22.9709	1.27973	10.6733	7.78894	32.0905	14.9573	14.206	5.87967	0.50732	7.74302	8.48029	16.401	1.57974	19.2635	18.8743	26.0525	8.21911	20.5773	15.8241
k__Bacteria|p__Proteobacteria|c__Betaproteobacteria|o__Burkholderiales	6.45305	0.81629	6.34648	6.4873	0.38029	0.89333	0	12.4704	0.2705	1.01774	0.68871	0.32368	1.29331	2.85074	1.33424	8.00177	9.3011	1.59985	4.44867	12.5272	5.92338	12.0017	8.63481	4.29905	3.49305	9.41331	0.77498	0.52744	0.46801	5.49177	5.54816	0.47025	2.99725	1.53765	6.96067	2.35848	1.92886	1.47131	0.0211	0.21014	0.02721	3.06824	0.35143	5.37428	3.96464	4.22561	1.94966	2.97061	1.89553
k__Bacteria|p__Proteobacteria|c__Betaproteobacteria|o__Burkholderiales|f__Burkholderiaceae	4.81914	0.46159	3.47086	5.15673	0.15984	0.3199	0	12.4704	0.2705	1.01774	0.68871	0.32368	0.37231	1.9494	1.32756	6.75581	6.28247	1.24439	3.60709	8.93609	5.21706	12.0017	6.89731	3.17899	2.02393	9.14243	0.72042	0.29004	0.24008	4.92668	4.37288	0.47025	2.16308	1.28984	4.84413	0.84342	1.91107	1.47131	0.0211	0.21014	0.02721	0.1769	0.02175	5.2278	2.93821	3.39538	1.92215	0.39198	0.38956
k__Bacteria|p__Proteobacteria|c__Betaproteobacteria|o__Burkholderiales|f__Burkholderiaceae|g__Lautropia	4.81914	0.46159	3.47086	5.15673	0.15984	0.3199	0	12.4704	0.2705	1.01774	0.68871	0.32368	0.37231	1.9494	1.32756	6.75581	6.28247	1.24439	3.60709	8.93609	5.21706	12.0017	6.89731	3.17899	2.02393	9.14243	0.72042	0.29004	0.24008	4.92668	4.37288	0.47025	2.16308	1.28984	4.84413	0.84342	1.91107	1.47131	0.0211	0.21014	0.02721	0.1769	0.02175	5.2278	2.93821	3.39538	1.92215	0.39198	0.38956
k__Bacteria|p__Proteobacteria|c__Betaproteobacteria|o__Burkholderiales|f__Burkholderiaceae|g__Lautropia|s__Lautropia_mirabilis	4.81914	0.46159	3.47086	5.15673	0.15984	0.3199	0	12.4704	0.2705	1.01774	0.68871	0.32368	0.37231	1.9494	1.32756	6.75581	6.28247	1.24439	3.60709	8.93609	5.21706	12.0017	6.89731	3.17899	2.02393	9.14243	0.72042	0.29004	0.24008	4.92668	4.37288	0.47025	2.16308	1.28984	4.84413	0.84342	1.91107	1.47131	0.0211	0.21014	0.02721	0.1769	0.02175	5.2278	2.93821	3.39538	1.92215	0.39198	0.38956
k__Bacteria|p__Proteobacteria|c__Betaproteobacteria|o__Burkholderiales|f__Burkholderiales_unclassified	0	0	0	0	0	0	0	0	0	0	0	0	0	0	0	0	0	0	0	0	0	0	0	0	0	0	0	0	0	0	0	0	0	0	0	0	0	0	0	0	0	0.01523	0	0.00365	0.01227	0.00905	0	0.01098	0.005
k__Bacteria|p__Proteobacteria|c__Betaproteobacteria|o__Burkholderiales|f__Burkholderiales_unclassified|g__Leptothrix	0	0	0	0	0	0	0	0	0	0	0	0	0	0	0	0	0	0	0	0	0	0	0	0	0	0	0	0	0	0	0	0	0	0	0	0	0	0	0	0	0	0.01523	0	0.00365	0.01227	0.00905	0	0.01098	0.005
k__Bacteria|p__Proteobacteria|c__Betaproteobacteria|o__Burkholderiales|f__Burkholderiales_unclassified|g__Leptothrix|s__Leptothrix_ochracea	0	0	0	0	0	0	0	0	0	0	0	0	0	0	0	0	0	0	0	0	0	0	0	0	0	0	0	0	0	0	0	0	0	0	0	0	0	0	0	0	0	0.01523	0	0.00365	0.01227	0.00905	0	0.01098	0.005
k__Bacteria|p__Proteobacteria|c__Betaproteobacteria|o__Burkholderiales|f__Comamonadaceae	1.63391	0.35469	2.87562	1.33057	0.22045	0.57343	0	0	0	0	0	0	0.921	0.90134	0.00668	1.24596	3.01862	0.35546	0.84158	3.59108	0.70632	0	1.7375	1.12006	1.46912	0.27088	0.05456	0.2374	0.22793	0.56509	1.17528	0	0.83418	0.24781	2.11654	1.51506	0.01779	0	0	0	0	2.86823	0.32969	0.12322	0.99316	0.79484	0.02161	2.56008	1.49618
k__Bacteria|p__Proteobacteria|c__Betaproteobacteria|o__Burkholderiales|f__Comamonadaceae|g__Ottowia	1.63391	0.35469	2.87562	1.33057	0.22045	0.57343	0	0	0	0	0	0	0.921	0.90134	0.00668	1.24596	3.01862	0.35546	0.84158	3.59108	0.70632	0	1.7375	1.12006	1.46912	0.27088	0.05456	0.2374	0.22793	0.56509	1.17528	0	0.83418	0.24781	2.11654	1.51506	0.01779	0	0	0	0	2.86823	0.32969	0.12322	0.99316	0.79484	0.02161	2.56008	1.49618
k__Bacteria|p__Proteobacteria|c__Betaproteobacteria|o__Burkholderiales|f__Comamonadaceae|g__Ottowia|s__Ottowia_sp_oral_taxon_894	1.63391	0.35469	2.87562	1.33057	0.22045	0.57343	0	0	0	0	0	0	0.921	0.90134	0.00668	1.24596	3.01862	0.35546	0.84158	3.59108	0.70632	0	1.7375	1.12006	1.46912	0.27088	0.05456	0.2374	0.22793	0.56509	1.17528	0	0.83418	0.24781	2.11654	1.51506	0.01779	0	0	0	0	2.86823	0.32969	0.12322	0.99316	0.79484	0.02161	2.56008	1.49618
k__Bacteria|p__Proteobacteria|c__Betaproteobacteria|o__Burkholderiales|f__Sutterellaceae	0	0	0	0	0	0	0	0	0	0	0	0	0	0	0	0	0	0	0	0	0	0	0	0	0	0	0	0	0	0	0	0	0	0	0	0	0	0	0	0	0	0.00789	0	0.01961	0.02099	0.02634	0.00589	0.00757	0.00479
k__Bacteria|p__Proteobacteria|c__Betaproteobacteria|o__Burkholderiales|f__Sutterellaceae|g__Sutterella	0	0	0	0	0	0	0	0	0	0	0	0	0	0	0	0	0	0	0	0	0	0	0	0	0	0	0	0	0	0	0	0	0	0	0	0	0	0	0	0	0	0.00789	0	0.01961	0.02099	0.02634	0.00589	0.00757	0.00479
k__Bacteria|p__Proteobacteria|c__Betaproteobacteria|o__Burkholderiales|f__Sutterellaceae|g__Sutterella|s__Sutterella_parvirubra	0	0	0	0	0	0	0	0	0	0	0	0	0	0	0	0	0	0	0	0	0	0	0	0	0	0	0	0	0	0	0	0	0	0	0	0	0	0	0	0	0	0.00789	0	0.01961	0.02099	0.02634	0.00589	0.00757	0.00479
k__Bacteria|p__Proteobacteria|c__Betaproteobacteria|o__Neisseriales	24.0439	24.8134	6.24049	17.64	1.04617	9.85772	0.04783	22.2706	2.69834	3.74973	2.03508	1.77156	8.27589	17.3839	12.6997	18.59	12.0173	14.3852	16.2174	19.5285	16.1357	9.86119	17.0985	5.27381	16.5896	2.79706	0.96089	5.79511	3.25142	11.5005	17.4228	0.80947	7.67606	6.25129	25.1298	12.5988	12.2772	4.40836	0.48622	7.53288	8.45308	13.3328	1.22831	13.8892	14.9097	21.8268	6.26945	17.6066	13.9286
k__Bacteria|p__Proteobacteria|c__Betaproteobacteria|o__Neisseriales|f__Neisseriaceae	24.0439	24.8134	6.24049	17.64	1.04617	9.85772	0.04783	22.2706	2.69834	3.74973	2.03508	1.77156	8.27589	17.3839	12.6997	18.59	12.0173	14.3852	16.2174	19.5285	16.1357	9.86119	17.0985	5.27381	16.5896	2.79706	0.96089	5.79511	3.25142	11.5005	17.4228	0.80947	7.67606	6.25129	25.1298	12.5988	12.2772	4.40836	0.48622	7.53288	8.45308	13.3328	1.22831	13.8892	14.9097	21.8268	6.26945	17.6066	13.9286
k__Bacteria|p__Proteobacteria|c__Betaproteobacteria|o__Neisseriales|f__Neisseriaceae|g__Eikenella	0.61446	0.30909	1.18324	0	0.12453	0	0	1.03067	0.38442	0.2841	0.16193	0.05862	0.2553	0.19398	0.06044	2.58416	1.05869	0.3606	0.72721	0.94304	0.20123	0	0.1903	0.14289	0.50732	0	0.11423	0.11335	0.08355	0	0	0	0.0813	0.17655	0.13784	0.14784	0.42688	0.19343	0.04942	0.04585	0	0.88304	0.32255	0.10046	0.34596	0.04867	0	1.50083	1.05647
k__Bacteria|p__Proteobacteria|c__Betaproteobacteria|o__Neisseriales|f__Neisseriaceae|g__Eikenella|s__Eikenella_corrodens	0.50905	0.30909	0.8302	0	0.113	0	0	1.03067	0.3722	0.28028	0.16193	0.05862	0.24144	0.1847	0.06044	2.14943	0.85119	0.26119	0.6043	0.72729	0.19577	0	0.14247	0.10131	0.50732	0	0.10695	0.09167	0.06176	0	0	0	0.0813	0.17655	0.13784	0.14784	0.39711	0.18334	0.04942	0.04585	0	0.86503	0.32255	0.08952	0.26106	0.04354	0	1.15595	0.75632
k__Bacteria|p__Proteobacteria|c__Betaproteobacteria|o__Neisseriales|f__Neisseriaceae|g__Eikenella|s__Eikenella_sp_NML02_A_017	0	0	0	0	0	0	0	0	0	0	0	0	0	0	0	0	0	0	0	0	0	0	0	0	0	0	0	0	0	0	0	0	0	0	0	0	0	0	0	0	0	0	0	0	0.00066	0	0	0.00181	0.00113
k__Bacteria|p__Proteobacteria|c__Betaproteobacteria|o__Neisseriales|f__Neisseriaceae|g__Eikenella|s__Eikenella_sp_NML130454	0.10542	0	0.35304	0	0.01153	0	0	0	0.01222	0.00383	0	0	0.01386	0.00928	0	0.43473	0.2075	0.09941	0.12291	0.21575	0.00546	0	0.04783	0.04158	0	0	0.00728	0.02168	0.02179	0	0	0	0	0	0	0	0.02977	0.01009	0	0	0	0.01801	0	0.01094	0.08424	0.00513	0	0.34307	0.29902
k__Bacteria|p__Proteobacteria|c__Betaproteobacteria|o__Neisseriales|f__Neisseriaceae|g__Kingella	0.01161	0.04102	0.26858	0	0.00362	0.16732	0	0.18206	0.11128	0.33122	0.55287	0.54567	0.06225	0.09519	0.72877	1.16987	1.12092	0.06625	0.25064	0.09137	0.47875	0	0.96754	0.27185	0.27019	0	0.07995	0.00109	0	0	0	0	0.99475	0.1997	0	0.1126	2.07711	1.06096	0.4368	2.34578	0.33214	0.2487	0.01224	0.14468	0.20124	0.18503	0.10364	0.80641	0.45128
k__Bacteria|p__Proteobacteria|c__Betaproteobacteria|o__Neisseriales|f__Neisseriaceae|g__Kingella|s__Kingella_denitrificans	0	0.02779	0.26729	0	0	0.16732	0	0	0	0	0.27314	0.04065	0.0471	0.02713	0.56204	1.10416	1.10761	0.0565	0.25064	0.09137	0.47875	0	0.90128	0.1083	0.27019	0	0.07359	0.00109	0	0	0	0	0.91288	0.18946	0	0.1126	0.95721	0.47402	0	0	0	0.22671	0.01224	0.14468	0.20124	0.00024	0	0.7624	0.45128
k__Bacteria|p__Proteobacteria|c__Betaproteobacteria|o__Neisseriales|f__Neisseriaceae|g__Kingella|s__Kingella_oralis	0.01161	0.01323	0.00129	0	0.00362	0	0	0.18206	0.11128	0.33122	0.27973	0.50502	0.01515	0.06806	0.16673	0.06571	0.0133	0.00975	0	0	0	0	0.06626	0.16355	0	0	0.00636	0	0	0	0	0	0.08186	0.01024	0	0	1.1199	0.58694	0.4368	2.34578	0.33214	0.01118	0	0	0	0.18479	0.10364	0.04401	0
k__Bacteria|p__Proteobacteria|c__Betaproteobacteria|o__Neisseriales|f__Neisseriaceae|g__Kingella|s__Kingella_potus	0	0	0	0	0	0	0	0	0	0	0	0	0	0	0	0	0	0	0	0	0	0	0	0	0	0	0	0	0	0	0	0	0	0	0	0	0	0	0	0	0	0.01081	0	0	0	0	0	0	0
k__Bacteria|p__Proteobacteria|c__Betaproteobacteria|o__Neisseriales|f__Neisseriaceae|g__Morococcus	0	0	0	0	0	0	0	0	0	0	0	0	0.00861	0	0	0	0	0	0	0	0	0	0	0	0	0	0	0.51106	0.34509	0	0.71027	0.09684	0	0	0	0	0	0	0	0	0.27211	0	0	0	0	0	0.32335	0	0
k__Bacteria|p__Proteobacteria|c__Betaproteobacteria|o__Neisseriales|f__Neisseriaceae|g__Morococcus|s__Morococcus_cerebrosus	0	0	0	0	0	0	0	0	0	0	0	0	0.00861	0	0	0	0	0	0	0	0	0	0	0	0	0	0	0.51106	0.34509	0	0.71027	0.09684	0	0	0	0	0	0	0	0	0.27211	0	0	0	0	0	0.32335	0	0
k__Bacteria|p__Proteobacteria|c__Betaproteobacteria|o__Neisseriales|f__Neisseriaceae|g__Neisseria	23.4178	24.4633	4.78867	17.64	0.91802	9.6904	0.04783	21.0578	2.20265	3.13441	1.32028	1.16727	7.94973	17.0947	11.9105	14.8359	9.83764	13.9583	15.2395	18.4941	15.4558	9.86119	15.9406	4.85906	15.8121	2.79706	0.76671	5.16961	2.82279	11.5005	16.7125	0.71263	6.60001	5.87504	24.9919	12.3384	9.77319	3.15397	0	5.14125	7.84882	12.201	0.89352	13.6441	14.3625	21.5931	5.84246	15.2994	12.4208
k__Bacteria|p__Proteobacteria|c__Betaproteobacteria|o__Neisseriales|f__Neisseriaceae|g__Neisseria|s__Neisseria_bacilliformis	0	0	0	0	0	0	0	2.89653	0	0	0.1193	0.07278	0	0	0	0	0	0	0	0	0	0	0.00356	0.00272	0	0	0	0	0	0	0	0.02605	0	0	0	0	0	0	0	0	0	0.87899	0.11248	0.00021	0.00141	0	0	0	0
k__Bacteria|p__Proteobacteria|c__Betaproteobacteria|o__Neisseriales|f__Neisseriaceae|g__Neisseria|s__Neisseria_cinerea	0.46177	0	0	0	0	0	0	0	0	0	0	0	0	0	0	0	0	0	0.01413	0.05003	0	0	0	0	0	0	0	0	0	0	0	0	0	0	0	0	0	0	0	0	0	0	0	0	0	0	0	0.00644	0.0125
k__Bacteria|p__Proteobacteria|c__Betaproteobacteria|o__Neisseriales|f__Neisseriaceae|g__Neisseria|s__Neisseria_elongata	7.29117	4.63686	0.99512	6.79577	0.33789	0.5538	0.04783	0	1.61772	1.85876	1.18983	1.03457	3.27157	4.24744	1.91745	0.24671	0.87595	0.57543	1.65917	5.3129	2.47409	0	5.84377	2.53611	4.35532	0	0	0.07992	0.08273	6.84832	0.89867	0	3.27925	1.79454	2.04428	2.24858	2.80933	0.70234	0	3.28229	0	5.71147	0.45526	2.08093	1.86572	0.05197	0.00351	2.93727	1.36919
k__Bacteria|p__Proteobacteria|c__Betaproteobacteria|o__Neisseriales|f__Neisseriaceae|g__Neisseria|s__Neisseria_flavescens	0.9494	0.24108	0.02075	0	0.08043	0	0	0	0.01655	0.00295	0	0	3.41041	3.57185	2.92625	7.89112	0.33266	0.50826	3.513	2.74947	2.01922	0	4.74313	1.53916	2.96694	0	0.31044	0.08165	0.14409	1.68035	0	0.1244	0.90058	1.4523	0.37224	1.94696	0.62875	1.15454	0	0.65338	0	3.20915	0.18078	2.67764	2.97612	0.01182	0	8.49918	6.00357
k__Bacteria|p__Proteobacteria|c__Betaproteobacteria|o__Neisseriales|f__Neisseriaceae|g__Neisseria|s__Neisseria_gonorrhoeae	0	0	0	0	0	0	0	0	0	0	0	0	0	0	0	0.0022	0	0	0	0	0	0	0	0	0	0	0	0	0	0	0	0	0	0	0	0	0	0	0	0	0	0	0	0	0	0	0	0	0
k__Bacteria|p__Proteobacteria|c__Betaproteobacteria|o__Neisseriales|f__Neisseriaceae|g__Neisseria|s__Neisseria_lactamica	0	0	0	0	0	0	0	0	0	0	0	0	0	0	0	0	0	0	0	0	0	0	0	0	0	0	0	0	0	0	0	0	0	0	0	0	0	0	0	0	0	0	0	0	0	0	0	0.00444	0.00213
k__Bacteria|p__Proteobacteria|c__Betaproteobacteria|o__Neisseriales|f__Neisseriaceae|g__Neisseria|s__Neisseria_macacae	0.17551	0	0	0	0	0	0	3.44141	0	0.01426	0	0	0.02216	0.08533	0.03615	0.22037	0.17018	0	0	0.01434	0.15532	0	0.00447	0	0.03238	0	0.01582	0	0.01111	0	0	0	0	0	0.54107	0.51788	0	0.0084	0	0	0	0.04093	0.00848	0.16038	0.12118	0.37998	0.55002	0.00321	0
k__Bacteria|p__Proteobacteria|c__Betaproteobacteria|o__Neisseriales|f__Neisseriaceae|g__Neisseria|s__Neisseria_meningitidis	0	0	0	0	0	0	0	0	0	0	0	0	0	0	0	0	0	0	0	0	0	0	0	0	0	0	0	0	0	0	0	0	0	0	0	0	0	0	0	0	0	0.00634	0	0	0.00966	0.00079	0	0	0
k__Bacteria|p__Proteobacteria|c__Betaproteobacteria|o__Neisseriales|f__Neisseriaceae|g__Neisseria|s__Neisseria_mucosa	2.39839	12.3464	1.13296	0	0.20026	0	0	0	0	0	0	0	0	0	5.40146	0.9981	0.73128	0.09634	0.08569	2.48415	0.01246	1.57329	2.48791	0.15677	6.26099	1.38895	0.04761	0	0.01576	0	0	0.01022	1.08081	0.3016	9.54187	2.46533	0.10588	0.01764	0	0	0	1.0203	0.05687	1.60986	1.05046	0	0	1.72864	2.92183
k__Bacteria|p__Proteobacteria|c__Betaproteobacteria|o__Neisseriales|f__Neisseriaceae|g__Neisseria|s__Neisseria_perflava	0	0	0	0	0	0	0	0	0	0	0	0	0	0.00465	0.0225	0.03458	0.01585	0.0209	0.02578	0.05416	0.02872	0	0.00827	0.00649	0	0	0	0	0	0	0	0	0	0	0	0	0.00191	0	0	0	0	0.00622	0	0.0219	0.00474	0	0	0.01536	0.00878
k__Bacteria|p__Proteobacteria|c__Betaproteobacteria|o__Neisseriales|f__Neisseriaceae|g__Neisseria|s__Neisseria_polysaccharea	0	0	0	0	0	0	0	0	0	0	0	0	0	0	0	0	0	0	0	0	0	0	0	0	0	0	0	0	0	0	0	0	0	0	0	0	0	0	0	0	0	0	0	0	0	0.00352	0	0	0
k__Bacteria|p__Proteobacteria|c__Betaproteobacteria|o__Neisseriales|f__Neisseriaceae|g__Neisseria|s__Neisseria_sicca	12.1416	7.23498	1.34085	10.8442	0.29944	3.35318	0	14.7199	0.01316	0.02432	0.01114	0.05932	0.37695	3.99673	1.60671	4.47409	4.58601	0.17147	0.35983	2.74945	5.84352	1.39913	2.60263	0.55401	2.19282	1.4081	0.28698	0.02304	0.04018	2.45961	11.2326	0.03976	1.25714	0.62763	10.5429	3.54498	0.91294	0.06468	0	1.10599	7.06718	0.9102	0.06341	4.50674	2.71298	4.35837	2.61855	2.04715	2.01145
k__Bacteria|p__Proteobacteria|c__Betaproteobacteria|o__Neisseriales|f__Neisseriaceae|g__Neisseria|s__Neisseria_sp_HMSC064E01	0	0.00396	0	0	0	0	0	0	0	0	0	0	0.02342	0.01475	0	0.01345	0.00129	0	0.00845	0.01052	0.014	0	0.064	0.00551	0	0	0	0	0	0	0	0	0	0	0.07575	0.01758	0	0	0	0	0	0.03292	0	0.05452	0.03846	0	0	0	0
k__Bacteria|p__Proteobacteria|c__Betaproteobacteria|o__Neisseriales|f__Neisseriaceae|g__Neisseria|s__Neisseria_sp_oral_taxon_014	0	0	1.29899	0	0	5.78343	0	0	0.55521	1.23413	0	0.00059	0.84522	5.17398	0	0.93179	3.1075	12.5749	9.37836	4.88828	4.83336	6.88877	0.18288	0.05311	0.00366	0	0.08126	4.97616	2.52027	0.5122	4.58119	0.51219	0.08223	1.69897	1.87382	1.59705	5.31438	1.18815	0	0.09959	0.78165	0.0442	0.00737	1.64411	4.87006	16.5798	2.58088	0.0015	0.00456
k__Bacteria|p__Proteobacteria|c__Betaproteobacteria|o__Neisseriales|f__Neisseriaceae|g__Neisseria|s__Neisseria_subflava	0	0	0	0	0	0	0	0	0	0	0	0	0	0	0	0.02352	0.01691	0.01097	0.1951	0.18084	0.07507	0	0	0.00518	0	0	0.0246	0.00885	0.00865	0	0	0	0	0	0	0	0	0.01822	0	0	0	0.34029	0.00886	0.88775	0.71167	0.20687	0.08949	0.05622	0.08683
k__Bacteria|p__Proteobacteria|c__Deltaproteobacteria	0	0.14851	0	0	0.42301	0	2.62925	0	0	0	0	0	0.78901	0.19923	0	0.15921	1.58664	0.24579	0.07614	0.33819	0.02987	0	0	0	0.04312	0	0.12965	5.80584	1.79635	5.58622	0	0.00277	0.48724	0.13041	0.34408	0.48832	0	0	0	0	0	0.16716	1.64129	0.14291	0.2781	0.02219	0.08187	0.01773	0.03014
k__Bacteria|p__Proteobacteria|c__Deltaproteobacteria|o__Desulfobacterales	0	0.12643	0	0	0.23424	0	2.62925	0	0	0	0	0	0.78901	0.19923	0	0.01734	0.28755	0.22603	0.06581	0.33819	0.02987	0	0	0	0.04312	0	0.03636	2.85121	1.46365	5.58622	0	0.00277	0.48724	0.13041	0.34408	0.48832	0	0	0	0	0	0.16716	1.64129	0.00056	0.00626	0.02219	0.08187	0.01773	0.03014
k__Bacteria|p__Proteobacteria|c__Deltaproteobacteria|o__Desulfobacterales|f__Desulfobulbaceae	0	0.12643	0	0	0.23424	0	2.62925	0	0	0	0	0	0.78901	0.19923	0	0.01734	0.28755	0.22603	0.06581	0.33819	0.02987	0	0	0	0.04312	0	0.03636	2.85121	1.46365	5.58622	0	0.00277	0.48724	0.13041	0.34408	0.48832	0	0	0	0	0	0.16716	1.64129	0.00056	0.00626	0.02219	0.08187	0.01773	0.03014
k__Bacteria|p__Proteobacteria|c__Deltaproteobacteria|o__Desulfobacterales|f__Desulfobulbaceae|g__Desulfobulbus	0	0.12643	0	0	0.23424	0	2.62925	0	0	0	0	0	0.78901	0.19923	0	0.01734	0.28755	0.22603	0.06581	0.33819	0.02987	0	0	0	0.04312	0	0.03636	2.85121	1.46365	5.58622	0	0.00277	0.48724	0.13041	0.34408	0.48832	0	0	0	0	0	0.16716	1.64129	0.00056	0.00626	0.02219	0.08187	0.01773	0.03014
k__Bacteria|p__Proteobacteria|c__Deltaproteobacteria|o__Desulfobacterales|f__Desulfobulbaceae|g__Desulfobulbus|s__Desulfobulbus_oralis	0	0.12643	0	0	0.23424	0	2.62925	0	0	0	0	0	0.78901	0.19923	0	0.01734	0.28755	0.22603	0.06581	0.33819	0.02987	0	0	0	0.04312	0	0.03636	2.85121	1.46365	5.58622	0	0.00277	0.48724	0.13041	0.34408	0.48832	0	0	0	0	0	0.16716	1.64129	0.00056	0.00626	0.02219	0.08187	0.01773	0.03014
k__Bacteria|p__Proteobacteria|c__Deltaproteobacteria|o__Desulfovibrionales	0	0.02208	0	0	0.18876	0	0	0	0	0	0	0	0	0	0	0.14187	1.29909	0.01976	0.01033	0	0	0	0	0	0	0	0.09328	2.95463	0.3327	0	0	0	0	0	0	0	0	0	0	0	0	0	0	0.14235	0.27184	0	0	0	0
k__Bacteria|p__Proteobacteria|c__Deltaproteobacteria|o__Desulfovibrionales|f__Desulfomicrobiaceae	0	0	0	0	0	0	0	0	0	0	0	0	0	0	0	0.14187	1.29909	0.01976	0.01033	0	0	0	0	0	0	0	0.09328	2.95463	0.3327	0	0	0	0	0	0	0	0	0	0	0	0	0	0	0.14235	0.27184	0	0	0	0
k__Bacteria|p__Proteobacteria|c__Deltaproteobacteria|o__Desulfovibrionales|f__Desulfomicrobiaceae|g__Desulfomicrobium	0	0	0	0	0	0	0	0	0	0	0	0	0	0	0	0.14187	1.29909	0.01976	0.01033	0	0	0	0	0	0	0	0.09328	2.95463	0.3327	0	0	0	0	0	0	0	0	0	0	0	0	0	0	0.14235	0.27184	0	0	0	0
k__Bacteria|p__Proteobacteria|c__Deltaproteobacteria|o__Desulfovibrionales|f__Desulfomicrobiaceae|g__Desulfomicrobium|s__Desulfomicrobium_orale	0	0	0	0	0	0	0	0	0	0	0	0	0	0	0	0.14187	1.29909	0.01976	0.01033	0	0	0	0	0	0	0	0.09328	2.95463	0.3327	0	0	0	0	0	0	0	0	0	0	0	0	0	0	0.14235	0.27184	0	0	0	0
k__Bacteria|p__Proteobacteria|c__Deltaproteobacteria|o__Desulfovibrionales|f__Desulfovibrionaceae	0	0.02208	0	0	0.18876	0	0	0	0	0	0	0	0	0	0	0	0	0	0	0	0	0	0	0	0	0	0	0	0	0	0	0	0	0	0	0	0	0	0	0	0	0	0	0	0	0	0	0	0
k__Bacteria|p__Proteobacteria|c__Deltaproteobacteria|o__Desulfovibrionales|f__Desulfovibrionaceae|g__Bilophila	0	0.02208	0	0	0.18876	0	0	0	0	0	0	0	0	0	0	0	0	0	0	0	0	0	0	0	0	0	0	0	0	0	0	0	0	0	0	0	0	0	0	0	0	0	0	0	0	0	0	0	0
k__Bacteria|p__Proteobacteria|c__Deltaproteobacteria|o__Desulfovibrionales|f__Desulfovibrionaceae|g__Bilophila|s__Bilophila_wadsworthia	0	0.02208	0	0	0.18876	0	0	0	0	0	0	0	0	0	0	0	0	0	0	0	0	0	0	0	0	0	0	0	0	0	0	0	0	0	0	0	0	0	0	0	0	0	0	0	0	0	0	0	0
k__Bacteria|p__Proteobacteria|c__Epsilonproteobacteria	0.41491	3.22639	1.5104	0	0.43914	1.56505	1.23121	0.71227	1.20679	1.15863	1.25498	2.01392	3.67865	2.22932	1.80416	0.65579	2.95049	1.85849	3.62254	2.50625	3.52656	0	1.76625	0.76743	2.44367	0	0.84845	1.58716	0.94659	1.25445	0.96374	4.84664	4.19357	2.50737	1.25838	2.05306	1.66875	3.07808	1.3507	0.6221	0.5023	3.59781	2.04899	2.43353	2.84147	0.91686	6.2	1.85593	1.16089
k__Bacteria|p__Proteobacteria|c__Epsilonproteobacteria|o__Campylobacterales	0.41491	3.22639	1.5104	0	0.43914	1.56505	1.23121	0.71227	1.20679	1.15863	1.25498	2.01392	3.67865	2.22932	1.80416	0.65579	2.95049	1.85849	3.62254	2.50625	3.52656	0	1.76625	0.76743	2.44367	0	0.84845	1.58716	0.94659	1.25445	0.96374	4.84664	4.19357	2.50737	1.25838	2.05306	1.66875	3.07808	1.3507	0.6221	0.5023	3.59781	2.04899	2.43353	2.84147	0.91686	6.2	1.85593	1.16089
k__Bacteria|p__Proteobacteria|c__Epsilonproteobacteria|o__Campylobacterales|f__Campylobacteraceae	0.41491	3.22639	1.5104	0	0.43914	1.56505	1.23121	0.71227	1.20679	1.15863	1.25498	2.01392	3.67865	2.22932	1.80416	0.65579	2.95049	1.85849	3.62254	2.50625	3.52656	0	1.76625	0.76743	2.44367	0	0.84845	1.58716	0.94659	1.25445	0.96374	4.84664	4.19357	2.50737	1.25838	2.05306	1.66875	3.07808	1.3507	0.6221	0.5023	3.59781	2.04899	2.43353	2.84147	0.91686	6.2	1.85593	1.16089
k__Bacteria|p__Proteobacteria|c__Epsilonproteobacteria|o__Campylobacterales|f__Campylobacteraceae|g__Campylobacter	0.41491	3.22639	1.5104	0	0.43914	1.56505	1.23121	0.71227	1.20679	1.15863	1.25498	2.01392	3.67865	2.22932	1.80416	0.65579	2.95049	1.85849	3.62254	2.50625	3.52656	0	1.76625	0.76743	2.44367	0	0.84845	1.58716	0.94659	1.25445	0.96374	4.84664	4.19357	2.50737	1.25838	2.05306	1.66875	3.07808	1.3507	0.6221	0.5023	3.59781	2.04899	2.43353	2.84147	0.91686	6.2	1.85593	1.16089
k__Bacteria|p__Proteobacteria|c__Epsilonproteobacteria|o__Campylobacterales|f__Campylobacteraceae|g__Campylobacter|s__Campylobacter_concisus	0.16148	0.06661	0	0	0	0	0	0	0.05147	0.06815	0.05255	0.17937	0.27792	0.21382	0.51274	0.02358	0.00178	0.80843	0.72375	0.5462	0.42412	0	0.45201	0.11301	0.7272	0	0	0.06572	0.09991	0	0	1.02106	0.47915	0.53805	0.00979	0.0768	0.31992	0.45374	0	0.06576	0.0177	0.00805	0	0.30464	0.21234	0.01433	0	0.217	0.20319
k__Bacteria|p__Proteobacteria|c__Epsilonproteobacteria|o__Campylobacterales|f__Campylobacteraceae|g__Campylobacter|s__Campylobacter_curvus	0	0	0.02811	0	0	0	0	0	0	0	0	0	0.05568	0.18016	0	0	0.00338	0.01161	0.07796	0	0.2354	0	0.03868	0	0	0	0	0	0	0	0	0	0.06293	0	0	0	0	0.02585	0	0	0	0	0	0.01917	0.00557	0	0	0	0
k__Bacteria|p__Proteobacteria|c__Epsilonproteobacteria|o__Campylobacterales|f__Campylobacteraceae|g__Campylobacter|s__Campylobacter_gracilis	0	0.2148	0.49558	0	0.04926	0.09906	0.36712	0	0.26034	0.42047	0.57308	0.85351	0.97671	0.93432	0.7373	0.12011	0.3826	0.63125	1.02231	0.3745	0.40881	0	0.82819	0.54035	0.65317	0	0.33404	0.37848	0.20973	0	0.0897	3.6465	1.78727	1.17507	0.39682	0.66456	0.93732	1.16769	1.32691	0.48254	0.29319	0.8743	0.20113	0.67252	0.8909	0.11335	1.06344	0.01769	0.00858
k__Bacteria|p__Proteobacteria|c__Epsilonproteobacteria|o__Campylobacterales|f__Campylobacteraceae|g__Campylobacter|s__Campylobacter_mucosalis	0	0.00126	0	0	0	0	0	0	0	0	0	0	0	0	0	0	0	0.0022	0.01008	0.00906	0	0	0	0	0	0	0	0	0	0	0	0	0	0	0	0	0	0	0	0	0	0.03049	0.00941	0.03363	0.02634	0.00625	0.02924	0.02517	0.01207
k__Bacteria|p__Proteobacteria|c__Epsilonproteobacteria|o__Campylobacterales|f__Campylobacteraceae|g__Campylobacter|s__Campylobacter_rectus	0	0.01301	0.34398	0	0.13589	0.70294	0.70704	0.71227	0	0.08427	0.10646	0.10344	1.13915	0.15488	0	0.08421	1.35068	0.05867	0.04	0.17022	0.99909	0	0.00982	0.00387	0	0	0.31289	0.71937	0.29803	0.7786	0.23862	0.09017	1.02404	0.45266	0.0394	0.07685	0.00298	0.6082	0	0	0.14492	0.05237	0.77268	0.13716	0.44436	0.02988	2.89243	0.05922	0.27208
k__Bacteria|p__Proteobacteria|c__Epsilonproteobacteria|o__Campylobacterales|f__Campylobacteraceae|g__Campylobacter|s__Campylobacter_showae	0.25343	2.93072	0.64273	0	0.25399	0.76305	0.15705	0	0.89498	0.58574	0.5229	0.87759	1.22918	0.74615	0.55412	0.42788	1.21205	0.34632	1.74843	1.40627	1.45914	0	0.43755	0.1102	1.0633	0	0.20152	0.42359	0.33892	0.47584	0.63542	0.08891	0.84017	0.3416	0.81237	1.23485	0.40853	0.82261	0.02379	0.0738	0.04649	2.6326	1.06577	1.2664	1.26196	0.75306	2.21489	1.53684	0.66497
k__Bacteria|p__Proteobacteria|c__Gammaproteobacteria	12.3393	2.49765	2.07113	2.94106	0.20315	3.77958	5.61155	3.54711	8.17531	7.87452	2.68056	3.72387	2.91587	4.93936	3.02741	9.53244	4.84315	3.52338	11.6625	4.46252	2.97573	4.20043	3.63098	0.79797	4.41121	4.37926	1.26057	0.70795	0.73784	1.31627	4.83837	1.93618	2.01733	0.75222	12.1179	4.07146	5.35374	3.5699	3.88216	7.69803	0.87746	2.56508	1.06993	2.82528	3.39102	0.75543	0.13183	3.59365	3.21912
k__Bacteria|p__Proteobacteria|c__Gammaproteobacteria|o__Aeromonadales	0	0	0	0	0	0	0	0	0	0	0	0	0	0	0	0	0	0	0	0	0	0	0	0	0	0	0	0	0	0	0	0	0	0	0	0	0	0	0	0	0	0.00525	0	0.00312	0	0	0	0	0.00252
k__Bacteria|p__Proteobacteria|c__Gammaproteobacteria|o__Aeromonadales|f__Succinivibrionaceae	0	0	0	0	0	0	0	0	0	0	0	0	0	0	0	0	0	0	0	0	0	0	0	0	0	0	0	0	0	0	0	0	0	0	0	0	0	0	0	0	0	0.00525	0	0.00312	0	0	0	0	0.00252
k__Bacteria|p__Proteobacteria|c__Gammaproteobacteria|o__Aeromonadales|f__Succinivibrionaceae|g__Anaerobiospirillum	0	0	0	0	0	0	0	0	0	0	0	0	0	0	0	0	0	0	0	0	0	0	0	0	0	0	0	0	0	0	0	0	0	0	0	0	0	0	0	0	0	0.00525	0	0.00312	0	0	0	0	0.00252
k__Bacteria|p__Proteobacteria|c__Gammaproteobacteria|o__Aeromonadales|f__Succinivibrionaceae|g__Anaerobiospirillum|s__Anaerobiospirillum_thomasii	0	0	0	0	0	0	0	0	0	0	0	0	0	0	0	0	0	0	0	0	0	0	0	0	0	0	0	0	0	0	0	0	0	0	0	0	0	0	0	0	0	0.00525	0	0.00312	0	0	0	0	0.00252
k__Bacteria|p__Proteobacteria|c__Gammaproteobacteria|o__Cardiobacteriales	0.6277	2.09039	1.41114	0	0.08762	2.15141	0	0	4.5345	6.08704	1.97822	1.50431	1.44693	1.77835	1.11501	3.22384	2.67713	2.53006	1.5158	2.6352	1.77809	0	0.68158	0.33312	2.00555	0.31588	0.37991	0.57786	0.61047	1.02857	3.97912	0.00768	0.19745	0.18958	1.52847	2.05596	3.05585	1.27359	0.90343	1.32554	0.08303	1.84012	0.25975	0.89655	1.79209	0.19279	0.04114	1.54891	1.04171
k__Bacteria|p__Proteobacteria|c__Gammaproteobacteria|o__Cardiobacteriales|f__Cardiobacteriaceae	0.6277	2.09039	1.41114	0	0.08762	2.15141	0	0	4.5345	6.08704	1.97822	1.50431	1.44693	1.77835	1.11501	3.22384	2.67713	2.53006	1.5158	2.6352	1.77809	0	0.68158	0.33312	2.00555	0.31588	0.37991	0.57786	0.61047	1.02857	3.97912	0.00768	0.19745	0.18958	1.52847	2.05596	3.05585	1.27359	0.90343	1.32554	0.08303	1.84012	0.25975	0.89655	1.79209	0.19279	0.04114	1.54891	1.04171
k__Bacteria|p__Proteobacteria|c__Gammaproteobacteria|o__Cardiobacteriales|f__Cardiobacteriaceae|g__Cardiobacterium	0.6277	2.09039	1.41114	0	0.08762	2.15141	0	0	4.5345	6.08704	1.97822	1.50431	1.44693	1.77835	1.11501	3.22384	2.67713	2.53006	1.5158	2.6352	1.77809	0	0.68158	0.33312	2.00555	0.31588	0.37991	0.57786	0.61047	1.02857	3.97912	0.00768	0.19745	0.18958	1.52847	2.05596	3.05585	1.27359	0.90343	1.32554	0.08303	1.84012	0.25975	0.89655	1.79209	0.19279	0.04114	1.54891	1.04171
k__Bacteria|p__Proteobacteria|c__Gammaproteobacteria|o__Cardiobacteriales|f__Cardiobacteriaceae|g__Cardiobacterium|s__Cardiobacterium_hominis	0.30629	0.17634	0.61178	0	0.01314	0.81948	0	0	1.58682	2.83984	0.75488	0.91251	0.44015	1.10584	0.9757	0.51829	0.70789	1.87377	1.0459	1.39838	1.11806	0	0.40122	0.15164	0.87828	0	0.07119	0.34997	0.17837	0.31971	1.63875	0	0.09549	0.12856	0.85217	0.44021	1.43197	0.38919	0.79866	1.15673	0.05401	0.80302	0.1009	0.23727	0.4591	0.03359	0.00665	0.23009	0.15462
k__Bacteria|p__Proteobacteria|c__Gammaproteobacteria|o__Cardiobacteriales|f__Cardiobacteriaceae|g__Cardiobacterium|s__Cardiobacterium_valvarum	0.3214	1.91405	0.79936	0	0.07448	1.33193	0	0	2.94767	3.2472	1.22334	0.59181	1.00678	0.67251	0.13931	2.70555	1.96925	0.65629	0.4699	1.23682	0.66002	0	0.28035	0.18148	1.12727	0.31588	0.30872	0.22789	0.43211	0.70886	2.34037	0.00768	0.10196	0.06102	0.67629	1.61575	1.62388	0.8844	0.10476	0.16881	0.02902	1.03709	0.15885	0.65928	1.33299	0.1592	0.03449	1.31882	0.88709
k__Bacteria|p__Proteobacteria|c__Gammaproteobacteria|o__Gammaproteobacteria_unclassified	0	0	0	0	0	0	0	0	0	0	0	0	0	0	0	0	0	0	0	0	0	0	0	0	0	0	0	0	0	0	0	0	0	0	0	0	0	0	0	0	0	0.00113	0	0.00464	0.00218	0.00485	0	0.00157	0.00154
k__Bacteria|p__Proteobacteria|c__Gammaproteobacteria|o__Gammaproteobacteria_unclassified|f__Gammaproteobacteria_unclassified	0	0	0	0	0	0	0	0	0	0	0	0	0	0	0	0	0	0	0	0	0	0	0	0	0	0	0	0	0	0	0	0	0	0	0	0	0	0	0	0	0	0.00113	0	0.00464	0.00218	0.00485	0	0.00157	0.00154
k__Bacteria|p__Proteobacteria|c__Gammaproteobacteria|o__Gammaproteobacteria_unclassified|f__Gammaproteobacteria_unclassified|g__Thiohalorhabdus	0	0	0	0	0	0	0	0	0	0	0	0	0	0	0	0	0	0	0	0	0	0	0	0	0	0	0	0	0	0	0	0	0	0	0	0	0	0	0	0	0	0.00113	0	0.00464	0.00218	0.00485	0	0.00157	0.00154
k__Bacteria|p__Proteobacteria|c__Gammaproteobacteria|o__Gammaproteobacteria_unclassified|f__Gammaproteobacteria_unclassified|g__Thiohalorhabdus|s__Thiohalorhabdus_denitrificans	0	0	0	0	0	0	0	0	0	0	0	0	0	0	0	0	0	0	0	0	0	0	0	0	0	0	0	0	0	0	0	0	0	0	0	0	0	0	0	0	0	0.00113	0	0.00464	0.00218	0.00485	0	0.00157	0.00154
k__Bacteria|p__Proteobacteria|c__Gammaproteobacteria|o__Pasteurellales	11.7116	0.40725	0.65999	2.94106	0.11553	1.62817	5.61155	3.54711	3.64082	1.78748	0.70234	2.21956	1.46894	3.16101	1.9124	6.3086	2.16601	0.99333	10.1467	1.82733	1.19764	4.20043	2.9494	0.46486	2.40566	4.06337	0.88066	0.13009	0.12736	0.28771	0.85925	1.9285	1.81988	0.56264	10.5895	2.01549	2.29789	2.29631	2.97873	6.37249	0.79443	0.71859	0.81018	1.92098	1.59674	0.55779	0.0907	2.04317	2.17335
k__Bacteria|p__Proteobacteria|c__Gammaproteobacteria|o__Pasteurellales|f__Pasteurellaceae	11.7116	0.40725	0.65999	2.94106	0.11553	1.62817	5.61155	3.54711	3.64082	1.78748	0.70234	2.21956	1.46894	3.16101	1.9124	6.3086	2.16601	0.99333	10.1467	1.82733	1.19764	4.20043	2.9494	0.46486	2.40566	4.06337	0.88066	0.13009	0.12736	0.28771	0.85925	1.9285	1.81988	0.56264	10.5895	2.01549	2.29789	2.29631	2.97873	6.37249	0.79443	0.71859	0.81018	1.92098	1.59674	0.55779	0.0907	2.04317	2.17335
k__Bacteria|p__Proteobacteria|c__Gammaproteobacteria|o__Pasteurellales|f__Pasteurellaceae|g__Aggregatibacter	0.36694	0.16071	0.61853	0	0.0347	0.48061	4.4013	0	3.51549	1.38355	0.55432	2.16001	1.19245	1.57014	1.14137	4.69117	1.67075	0.73097	9.91496	1.13389	0.75957	0	1.44819	0.19062	1.16763	0	0.32928	0.08776	0.11278	0.22733	0	0	1.05096	0.28656	9.46664	1.4246	1.00099	1.54005	1.21073	2.20488	0.04543	0.71607	0.81018	1.28248	1.30116	0.00774	0	1.8822	2.05547
k__Bacteria|p__Proteobacteria|c__Gammaproteobacteria|o__Pasteurellales|f__Pasteurellaceae|g__Aggregatibacter|s__Aggregatibacter_actinomycetemcomitans	0	0	0	0	0	0	0	0	0	0	0	0	0	0	0	0	0	0	0	0	0	0	0	0	0	0	0	0	0	0	0	0	0	0	0	0	0	0	0	0	0	0	0	0	0	0	0	0	0
k__Bacteria|p__Proteobacteria|c__Gammaproteobacteria|o__Pasteurellales|f__Pasteurellaceae|g__Aggregatibacter|s__Aggregatibacter_aphrophilus	0	0	0.44978	0	0	0	4.4013	0	0	0	0	0	0	0	0.0034	0.04382	0.66522	0	0	0.00209	0	0	0.01936	0.02701	0	0	0	0	0	0	0	0	0.13419	0.16991	8.35678	0.21423	0	0	0	0	0	0.0522	0.41119	0.01132	0.03093	0	0	0	0
k__Bacteria|p__Proteobacteria|c__Gammaproteobacteria|o__Pasteurellales|f__Pasteurellaceae|g__Aggregatibacter|s__Aggregatibacter_segnis	0.11604	0.12433	0.09082	0	0.02754	0.48061	0	0	0.12312	0.08776	0.06585	0.14074	0.93347	0.70063	0.42225	4.48823	0.98672	0.69305	9.33257	0.96755	0.42504	0	0.4926	0.10401	0.55879	0	0.32928	0.08565	0.09613	0.22733	0	0	0.55071	0.06597	0.94785	0.85607	0.1621	0.93451	0.02314	0.04847	0.04274	0.54108	0.38852	0.99345	1.04921	0.00774	0	0.95433	1.75869
k__Bacteria|p__Proteobacteria|c__Gammaproteobacteria|o__Pasteurellales|f__Pasteurellaceae|g__Aggregatibacter|s__Aggregatibacter_sp_oral_taxon_458	0.2509	0.03638	0.07794	0	0.00716	0	0	0	3.39237	1.29579	0.48847	2.01927	0.25898	0.86951	0.71572	0.15912	0.01881	0.03791	0.58238	0.16426	0.33452	0	0.93623	0.0596	0.60884	0	0	0.00211	0.01665	0	0	0	0.36606	0.05067	0.162	0.35429	0.83889	0.60554	1.18759	2.15642	0.00269	0.12279	0.01047	0.27771	0.22102	0	0	0.92787	0.29678
k__Bacteria|p__Proteobacteria|c__Gammaproteobacteria|o__Pasteurellales|f__Pasteurellaceae|g__Haemophilus	11.3446	0.24654	0.04146	2.94106	0.08083	1.14756	1.21025	3.54711	0.12533	0.40393	0.14802	0.05955	0.27648	1.59087	0.77103	1.61743	0.49526	0.26236	0.23171	0.69343	0.43808	4.20043	1.50121	0.27424	1.23803	4.06337	0.55138	0.04233	0.01458	0.06038	0.85925	1.9285	0.76892	0.27609	1.12282	0.5909	1.2969	0.75626	1.768	4.1676	0.749	0.00252	0	0.6385	0.29558	0.55004	0.0907	0.16097	0.11788
k__Bacteria|p__Proteobacteria|c__Gammaproteobacteria|o__Pasteurellales|f__Pasteurellaceae|g__Haemophilus|s__Haemophilus_haemolyticus	0.71493	0	0	0	0	0	0	0	0	0	0	0	0	0.03156	0	0	0	0.03605	0.0298	0.01176	0.07212	0	0	0.00055	0	0	0	0.01273	0	0	0	0	0.02783	0	0	0	0	0	0	0	0	0	0	0.00192	0	0	0	0.00896	0.01121
k__Bacteria|p__Proteobacteria|c__Gammaproteobacteria|o__Pasteurellales|f__Pasteurellaceae|g__Haemophilus|s__Haemophilus_parahaemolyticus	0	0	0	0	0	0	0	0	0	0	0	0	0	0	0	0	0	0	0	0.00763	0	0	0	0	0.00952	0	0	0	0	0	0	0	0	0	0.02178	0.00409	0	0	0	0	0	0	0	0	0	0	0	0	0
k__Bacteria|p__Proteobacteria|c__Gammaproteobacteria|o__Pasteurellales|f__Pasteurellaceae|g__Haemophilus|s__Haemophilus_parainfluenzae	10.5484	0.24654	0.04146	2.94106	0.08083	1.14756	1.21025	3.54711	0.11791	0.40393	0.14802	0.05955	0.24948	1.46309	0.75894	1.56698	0.47047	0.19003	0.18165	0.66545	0.32611	4.20043	1.50121	0.27369	1.19929	4.06337	0.52347	0.01842	0.01458	0.06038	0.85925	1.9285	0.7096	0.27609	1.08933	0.57677	1.15604	0.66974	1.768	4.1676	0.749	0.00252	0	0.63425	0.29558	0.55004	0.0907	0.14588	0.10419
k__Bacteria|p__Proteobacteria|c__Gammaproteobacteria|o__Pasteurellales|f__Pasteurellaceae|g__Haemophilus|s__Haemophilus_paraphrohaemolyticus	0	0	0	0	0	0	0	0	0	0	0	0	0	0	0	0	0.00589	0	0	0.00355	0	0	0	0	0	0	0	0	0	0	0	0	0	0	0	0	0	0	0	0	0	0	0	0	0	0	0	0	0
k__Bacteria|p__Proteobacteria|c__Gammaproteobacteria|o__Pasteurellales|f__Pasteurellaceae|g__Haemophilus|s__Haemophilus_quentini	0.08131	0	0	0	0	0	0	0	0	0	0	0	0	0	0	0	0	0	0.00834	0.00505	0	0	0	0	0	0	0	0	0	0	0	0	0.0315	0	0	0	0	0	0	0	0	0	0	0	0	0	0	0.00384	0.00247
k__Bacteria|p__Proteobacteria|c__Gammaproteobacteria|o__Pasteurellales|f__Pasteurellaceae|g__Haemophilus|s__Haemophilus_sp_HMSC71H05	0	0	0	0	0	0	0	0	0.00537	0	0	0	0.02701	0.09621	0.01209	0.05045	0.01891	0	0	0	0.02546	0	0	0	0.02527	0	0.02791	0	0	0	0	0	0	0	0.01172	0	0.14086	0.08651	0	0	0	0	0	0.00233	0	0	0	0	0
k__Bacteria|p__Proteobacteria|c__Gammaproteobacteria|o__Pasteurellales|f__Pasteurellaceae|g__Haemophilus|s__Haemophilus_sputorum	0	0	0	0	0	0	0	0	0.00205	0	0	0	0	0	0	0	0	0.03628	0.01192	0	0.01438	0	0	0	0.00396	0	0	0.01118	0	0	0	0	0	0	0	0.01003	0	0	0	0	0	0	0	0	0	0	0	0.00229	0
k__Bacteria|p__Proteobacteria|c__Gammaproteobacteria|o__Pseudomonadales	0	0	0	0	0	0	0	0	0	0	0	0	0	0	0	0	0	0	0	0	0	0	0	0	0	0	0	0	0	0	0	0	0	0	0	0	0	0	0	0	0	0	0	0	0	0	0	0	0
k__Bacteria|p__Proteobacteria|c__Gammaproteobacteria|o__Pseudomonadales|f__Moraxellaceae	0	0	0	0	0	0	0	0	0	0	0	0	0	0	0	0	0	0	0	0	0	0	0	0	0	0	0	0	0	0	0	0	0	0	0	0	0	0	0	0	0	0	0	0	0	0	0	0	0
k__Bacteria|p__Proteobacteria|c__Gammaproteobacteria|o__Pseudomonadales|f__Moraxellaceae|g__Acinetobacter	0	0	0	0	0	0	0	0	0	0	0	0	0	0	0	0	0	0	0	0	0	0	0	0	0	0	0	0	0	0	0	0	0	0	0	0	0	0	0	0	0	0	0	0	0	0	0	0	0
k__Bacteria|p__Proteobacteria|c__Gammaproteobacteria|o__Pseudomonadales|f__Moraxellaceae|g__Acinetobacter|s__Acinetobacter_johnsonii	0	0	0	0	0	0	0	0	0	0	0	0	0	0	0	0	0	0	0	0	0	0	0	0	0	0	0	0	0	0	0	0	0	0	0	0	0	0	0	0	0	0	0	0	0	0	0	0	0
k__Bacteria|p__Spirochaetes	0	2.90388	5.52521	2.87356	10.8727	4.57808	11.7078	0	0.35106	1.56766	1.59061	1.16429	5.3251	2.35381	0.6226	0.8809	6.09184	1.37018	1.39393	2.80901	6.22074	0	0.32374	0.0591	0.67111	0	6.26097	12.4526	6.27368	5.59628	0.78135	2.36823	7.21332	3.69343	1.88179	3.12263	0.68741	3.4835	0.01473	0.2068	0.28201	3.56819	10.586	2.43767	3.93199	0.27885	6.35418	0.38827	1.92899
k__Bacteria|p__Spirochaetes|c__Spirochaetia	0	2.90388	5.52521	2.87356	10.8727	4.57808	11.7078	0	0.35106	1.56766	1.59061	1.16429	5.3251	2.35381	0.6226	0.8809	6.09184	1.37018	1.39393	2.80901	6.22074	0	0.32374	0.0591	0.67111	0	6.26097	12.4526	6.27368	5.59628	0.78135	2.36823	7.21332	3.69343	1.88179	3.12263	0.68741	3.4835	0.01473	0.2068	0.28201	3.56819	10.586	2.43767	3.93199	0.27885	6.35418	0.38827	1.92899
k__Bacteria|p__Spirochaetes|c__Spirochaetia|o__Spirochaetales	0	2.90388	5.52521	2.87356	10.8727	4.57808	11.7078	0	0.35106	1.56766	1.59061	1.16429	5.3251	2.35381	0.6226	0.8809	6.09184	1.37018	1.39393	2.80901	6.22074	0	0.32374	0.0591	0.67111	0	6.26097	12.4526	6.27368	5.59628	0.78135	2.36823	7.21332	3.69343	1.88179	3.12263	0.68741	3.4835	0.01473	0.2068	0.28201	3.56819	10.586	2.43767	3.93199	0.27885	6.35418	0.38827	1.92899
k__Bacteria|p__Spirochaetes|c__Spirochaetia|o__Spirochaetales|f__Spirochaetaceae	0	2.90388	5.52521	2.87356	10.8727	4.57808	11.7078	0	0.35106	1.56766	1.59061	1.16429	5.3251	2.35381	0.6226	0.8809	6.09184	1.37018	1.39393	2.80901	6.22074	0	0.32374	0.0591	0.67111	0	6.26097	12.4526	6.27368	5.59628	0.78135	2.36823	7.21332	3.69343	1.88179	3.12263	0.68741	3.4835	0.01473	0.2068	0.28201	3.56819	10.586	2.43767	3.93199	0.27885	6.35418	0.38827	1.92899
k__Bacteria|p__Spirochaetes|c__Spirochaetia|o__Spirochaetales|f__Spirochaetaceae|g__Treponema	0	2.90388	5.52521	2.87356	10.8727	4.57808	11.7078	0	0.35106	1.56766	1.59061	1.16429	5.3251	2.35381	0.6226	0.8809	6.09184	1.37018	1.39393	2.80901	6.22074	0	0.32374	0.0591	0.67111	0	6.26097	12.4526	6.27368	5.59628	0.78135	2.36823	7.21332	3.69343	1.88179	3.12263	0.68741	3.4835	0.01473	0.2068	0.28201	3.56819	10.586	2.43767	3.93199	0.27885	6.35418	0.38827	1.92899
k__Bacteria|p__Spirochaetes|c__Spirochaetia|o__Spirochaetales|f__Spirochaetaceae|g__Treponema|s__Treponema_denticola	0	0.16799	2.35627	2.87356	5.52068	0.7837	5.68171	0	0.04724	0.23842	0.14363	0.03711	2.43488	0.5971	0.01577	0.0634	2.51318	0.33754	0.28074	0.54068	1.93322	0	0.00555	0.00064	0.07485	0	0.52776	7.48425	2.42408	2.24398	0.40828	1.43973	2.30382	1.17046	0.39272	0.68206	0.01767	1.72513	0	0.0213	0.09331	1.02904	5.44382	0.85105	1.56486	0.127	3.72349	0.21744	1.51982
k__Bacteria|p__Spirochaetes|c__Spirochaetia|o__Spirochaetales|f__Spirochaetaceae|g__Treponema|s__Treponema_lecithinolyticum	0	0.00714	0.23489	0	0.51761	0.9807	1.95744	0	0	0.48473	0.16721	0.06721	0.27882	0.01462	0.01735	0	0.66284	0.00638	0.01131	0.01354	0	0	0	0	0.0393	0	0.00783	0.8986	0.29907	0	0	0.01961	0.12441	0.07915	0.0082	0.01283	0	0	0	0.05239	0	0	0	0.12048	0.30473	0.01653	0.14547	0.00319	0.03987
k__Bacteria|p__Spirochaetes|c__Spirochaetia|o__Spirochaetales|f__Spirochaetaceae|g__Treponema|s__Treponema_maltophilum	0	0.96419	0.81423	0	0.90686	0.59302	0.28959	0	0.13877	0.24973	0.32435	0.21289	0.65748	0.47613	0.05149	0.30299	1.24996	0.14537	0.17793	0.36507	1.34421	0	0.01852	0	0.06665	0	0.94714	1.21758	0.66849	0.58287	0.14573	0.25375	0.75568	0.37225	0.43968	0.75238	0.28064	0.55894	0	0.0108	0.06052	0.47491	1.67146	0.31564	0.3876	0.07528	1.00287	0.0376	0.11427
k__Bacteria|p__Spirochaetes|c__Spirochaetia|o__Spirochaetales|f__Spirochaetaceae|g__Treponema|s__Treponema_medium	0	0.03749	0.06724	0	0.73712	0.41565	2.16741	0	0.00796	0.05594	0.02093	0.01179	0.31748	0.10378	0.01979	0.00141	0.06424	0.07074	0.0426	0.60356	0.42354	0	0.01348	0.00117	0.0245	0	0.02993	0.59951	0.4352	1.19161	0	0.10347	0.92441	0.27339	0.02714	0.06906	0.00804	0.01317	0	0	0	0.10186	0.466	0.13825	0.2587	0.00844	0.47722	0.0285	0.07113
k__Bacteria|p__Spirochaetes|c__Spirochaetia|o__Spirochaetales|f__Spirochaetaceae|g__Treponema|s__Treponema_putidum	0	0	0	0	0.14503	0	0	0	0	0	0	0	0	0	0	0	0.0045	0.03158	0.00326	0.0147	0.01196	0	0	0	0	0	0	0.13845	0.22271	0	0	0	0.0418	0	0	0	0	0	0	0	0	0.00447	0.00519	0.00757	0.00869	0	0.02081	0.00088	0.00763
k__Bacteria|p__Spirochaetes|c__Spirochaetia|o__Spirochaetales|f__Spirochaetaceae|g__Treponema|s__Treponema_socranskii	0	1.1286	1.68389	0	1.20679	1.66884	0.52328	0	0.12935	0.44028	0.67122	0.57221	0.82601	0.5804	0.37257	0.2557	0.98273	0.46023	0.36149	0.62974	0.95278	0	0.20103	0.04507	0.37159	0	1.12954	1.50952	1.15769	0.78504	0.06256	0.46439	1.90761	1.24175	0.74118	1.26455	0.36285	0.67006	0.01473	0.09679	0.11086	0.9735	1.48538	0.64794	0.76156	0.04307	0.56099	0.02994	0.05698
k__Bacteria|p__Spirochaetes|c__Spirochaetia|o__Spirochaetales|f__Spirochaetaceae|g__Treponema|s__Treponema_sp_OMZ_838	0	0.00597	0.05811	0	0.23598	0.13617	0.58743	0	0.02774	0.09856	0.0499	0.02187	0.32475	0.19412	0.14563	0.00191	0.11857	0.03362	0.03916	0.22109	0.60874	0	0.00124	0	0.09423	0	0.09484	0.26308	0.33555	0.31341	0	0.08729	0.31314	0.09563	0.00555	0.03106	0.0182	0.01672	0	0	0.01731	0.05638	0.37755	0.27418	0.49574	0.00613	0.28403	0.02792	0.03762
k__Bacteria|p__Spirochaetes|c__Spirochaetia|o__Spirochaetales|f__Spirochaetaceae|g__Treponema|s__Treponema_vincentii	0	0.5925	0.31059	0	1.60264	0	0.50092	0	0	0	0.21338	0.24121	0.48567	0.38767	0	0.25548	0.49582	0.28471	0.47743	0.42063	0.94629	0	0.08392	0.01222	0	0	3.52392	0.34158	0.7309	0.47936	0.16479	0	0.84245	0.46081	0.26733	0.31069	0	0.49948	0	0.02552	0	0.92803	1.13657	0.08255	0.15009	0.00241	0.1393	0.0428	0.08168
k__Bacteria|p__Synergistetes	0	0.21168	2.45066	0.71575	1.3818	5.35736	2.89878	0.23426	0	0.14805	0.18813	0.15083	0.19922	0.05209	0	0.06741	0.75724	0.2488	0.14156	0.17985	0.13316	0	0.00274	0.00703	0.05693	0	0.32702	3.72986	1.83891	4.10597	0.20237	0.02693	1.74599	1.80845	0.19104	0.26547	0	0.07556	0	0.00556	0	0.58339	1.80298	0.123	0.14909	0.03267	0.09005	0.02056	0.01309
k__Bacteria|p__Synergistetes|c__Synergistia	0	0.21168	2.45066	0.71575	1.3818	5.35736	2.89878	0.23426	0	0.14805	0.18813	0.15083	0.19922	0.05209	0	0.06741	0.75724	0.2488	0.14156	0.17985	0.13316	0	0.00274	0.00703	0.05693	0	0.32702	3.72986	1.83891	4.10597	0.20237	0.02693	1.74599	1.80845	0.19104	0.26547	0	0.07556	0	0.00556	0	0.58339	1.80298	0.123	0.14909	0.03267	0.09005	0.02056	0.01309
k__Bacteria|p__Synergistetes|c__Synergistia|o__Synergistales	0	0.21168	2.45066	0.71575	1.3818	5.35736	2.89878	0.23426	0	0.14805	0.18813	0.15083	0.19922	0.05209	0	0.06741	0.75724	0.2488	0.14156	0.17985	0.13316	0	0.00274	0.00703	0.05693	0	0.32702	3.72986	1.83891	4.10597	0.20237	0.02693	1.74599	1.80845	0.19104	0.26547	0	0.07556	0	0.00556	0	0.58339	1.80298	0.123	0.14909	0.03267	0.09005	0.02056	0.01309
k__Bacteria|p__Synergistetes|c__Synergistia|o__Synergistales|f__Synergistaceae	0	0.21168	2.45066	0.71575	1.3818	5.35736	2.89878	0.23426	0	0.14805	0.18813	0.15083	0.19922	0.05209	0	0.06741	0.75724	0.2488	0.14156	0.17985	0.13316	0	0.00274	0.00703	0.05693	0	0.32702	3.72986	1.83891	4.10597	0.20237	0.02693	1.74599	1.80845	0.19104	0.26547	0	0.07556	0	0.00556	0	0.58339	1.80298	0.123	0.14909	0.03267	0.09005	0.02056	0.01309
k__Bacteria|p__Synergistetes|c__Synergistia|o__Synergistales|f__Synergistaceae|g__Fretibacterium	0	0.21168	2.45066	0.71575	1.2484	5.35736	2.89878	0.23426	0	0.14805	0.18813	0.15083	0.19922	0.05209	0	0.06664	0.68235	0.18859	0.09571	0.17985	0.13316	0	0.00274	0.00703	0.05693	0	0.14359	3.45275	0.96833	4.10597	0.20237	0.02693	1.648	1.80845	0.19104	0.26547	0	0.07556	0	0.00556	0	0.48627	1.56792	0.123	0.14909	0.03267	0.09005	0.02056	0.01309
k__Bacteria|p__Synergistetes|c__Synergistia|o__Synergistales|f__Synergistaceae|g__Fretibacterium|s__Fretibacterium_fastidiosum	0	0.21168	2.45066	0.71575	1.2484	5.35736	2.89878	0.23426	0	0.14805	0.18813	0.15083	0.19922	0.05209	0	0.06664	0.68235	0.18859	0.09571	0.17985	0.13316	0	0.00274	0.00703	0.05693	0	0.14359	3.45275	0.96833	4.10597	0.20237	0.02693	1.648	1.80845	0.19104	0.26547	0	0.07556	0	0.00556	0	0.48627	1.56792	0.123	0.14909	0.03267	0.09005	0.02056	0.01309
k__Bacteria|p__Synergistetes|c__Synergistia|o__Synergistales|f__Synergistaceae|g__Pyramidobacter	0	0	0	0	0.13339	0	0	0	0	0	0	0	0	0	0	0.00077	0.07489	0.05379	0.03947	0	0	0	0	0	0	0	0.18343	0.14686	0.73627	0	0	0	0.09799	0	0	0	0	0	0	0	0	0.00276	0	0	0	0	0	0	0
k__Bacteria|p__Synergistetes|c__Synergistia|o__Synergistales|f__Synergistaceae|g__Pyramidobacter|s__Pyramidobacter_piscolens	0	0	0	0	0.13249	0	0	0	0	0	0	0	0	0	0	0.00077	0.06415	0.05158	0.0372	0	0	0	0	0	0	0	0.1661	0.13465	0.68762	0	0	0	0.09799	0	0	0	0	0	0	0	0	0.00276	0	0	0	0	0	0	0
k__Bacteria|p__Synergistetes|c__Synergistia|o__Synergistales|f__Synergistaceae|g__Pyramidobacter|s__Pyramidobacter_sp_C12_8	0	0	0	0	0.0009	0	0	0	0	0	0	0	0	0	0	0	0.01073	0.00221	0.00228	0	0	0	0	0	0	0	0.01734	0.01222	0.04864	0	0	0	0	0	0	0	0	0	0	0	0	0	0	0	0	0	0	0	0
k__Bacteria|p__Synergistetes|c__Synergistia|o__Synergistales|f__Synergistaceae|g__Synergistes	0	0	0	0	0	0	0	0	0	0	0	0	0	0	0	0	0	0.00642	0.00637	0	0	0	0	0	0	0	0	0.13025	0.13431	0	0	0	0	0	0	0	0	0	0	0	0	0.09435	0.23507	0	0	0	0	0	0
k__Bacteria|p__Synergistetes|c__Synergistia|o__Synergistales|f__Synergistaceae|g__Synergistes|s__Synergistes_jonesii	0	0	0	0	0	0	0	0	0	0	0	0	0	0	0	0	0	0.00642	0.00637	0	0	0	0	0	0	0	0	0.13025	0.13431	0	0	0	0	0	0	0	0	0	0	0	0	0.09435	0.23507	0	0	0	0	0	0
k__Bacteria|p__Tenericutes	0	0	0	0	0	0	0	0	0	0	0	0	0	0	0	0	0	0	0	0	0	0	0	0	0	0	0	0	0	0	0	0	0	0	0	0	0	0	0	0	0	0	0	0	0	0	0	0	0.0017
k__Bacteria|p__Tenericutes|c__Mollicutes	0	0	0	0	0	0	0	0	0	0	0	0	0	0	0	0	0	0	0	0	0	0	0	0	0	0	0	0	0	0	0	0	0	0	0	0	0	0	0	0	0	0	0	0	0	0	0	0	0.0017
k__Bacteria|p__Tenericutes|c__Mollicutes|o__Acholeplasmatales	0	0	0	0	0	0	0	0	0	0	0	0	0	0	0	0	0	0	0	0	0	0	0	0	0	0	0	0	0	0	0	0	0	0	0	0	0	0	0	0	0	0	0	0	0	0	0	0	0.0017
k__Bacteria|p__Tenericutes|c__Mollicutes|o__Acholeplasmatales|f__Acholeplasmataceae	0	0	0	0	0	0	0	0	0	0	0	0	0	0	0	0	0	0	0	0	0	0	0	0	0	0	0	0	0	0	0	0	0	0	0	0	0	0	0	0	0	0	0	0	0	0	0	0	0.0017
k__Bacteria|p__Tenericutes|c__Mollicutes|o__Acholeplasmatales|f__Acholeplasmataceae|g__Acholeplasma	0	0	0	0	0	0	0	0	0	0	0	0	0	0	0	0	0	0	0	0	0	0	0	0	0	0	0	0	0	0	0	0	0	0	0	0	0	0	0	0	0	0	0	0	0	0	0	0	0.0017
k__Bacteria|p__Tenericutes|c__Mollicutes|o__Acholeplasmatales|f__Acholeplasmataceae|g__Acholeplasma|s__Acholeplasma_oculi	0	0	0	0	0	0	0	0	0	0	0	0	0	0	0	0	0	0	0	0	0	0	0	0	0	0	0	0	0	0	0	0	0	0	0	0	0	0	0	0	0	0	0	0	0	0	0	0	0.0017
[truncated: 15 more columns]
